# Supplementary material for: Identification of genomic regions associated with multi-silique trait in Brassica napus
Source: BMC Genomics. 2019 Apr 23;20:304. doi: 10.1186/s12864-019-5675-4 (PMC6480887; doi:10.1186/s12864-019-5675-4)
Supplement: Supplementary file 4 — Table S3. Annotations of the 2041 genes in the two intersection associated regions. (XLSX 340 kb) [file 12864_2019_5675_MOESM4_ESM.xlsx]

## Sheet: Brapa_napus.annotation (1)
Additional file 4: Table S3. Annotations of the 2041 genes in the two intersection associated regions
#Gene_ID	COG_class	COG_class_annotation	GO_annotation	KEGG_annotation	KOG_class	KOG_class_annotation	Pfam_annotation	Swissprot_annotation	TrEMBL_annotation	nr_annotation	nt_annotation
BnaC08g39370D	--	--	Cellular Component: nucleus (GO:0005634);; Cellular Component: cytosol (GO:0005829);;	--	[S]	Function unknown	2OG-Fe(II) oxygenase superfamily	--	BnaC08g39370D protein {ECO:0000313|EMBL:CDX81664.1} OS=Brassica napus (Rape) PE=4 SV=1	BnaC08g39370D [Brassica napus]	PREDICTED: Brassica rapa uncharacterized LOC103842949 (LOC103842949), transcript variant X2, mRNA
BnaA09g46860D	[Q]	Secondary metabolites biosynthesis, transport and catabolism	Molecular Function: monooxygenase activity (GO:0004497);; Molecular Function: iron ion binding (GO:0005506);; Cellular Component: mitochondrion (GO:0005739);; Biological Process: iron ion transport (GO:0006826);; Molecular Function: electron carrier activity (GO:0009055);; Biological Process: cellular response to iron ion starvation (GO:0010106);; Biological Process: response to nitrate (GO:00101…	--	[QI]	--	Cytochrome P450	Cytochrome P450 87A3 GN=OSJNBa0088I22.16 OS=Oryza sativa subsp. japonica (Rice) PE=2 SV=3	BnaA09g46860D protein {ECO:0000313|EMBL:CDY26591.1} OS=Brassica napus (Rape) PE=3 SV=1	BnaA09g46860D [Brassica napus]	PREDICTED: Brassica rapa cytochrome P450 87A3-like (LOC103843106), mRNA
BnaA09g44400D	--	--	Biological Process: nuclear-transcribed mRNA catabolic process (GO:0000956);; Molecular Function: aminoacyl-tRNA ligase activity (GO:0004812);; Cellular Component: nucleus (GO:0005634);; Biological Process: regulation of mitotic cell cycle (GO:0007346);;	--	--	--	DDT domain	Nucleolin 2 GN=OSJNBa0058K23.21 OS=Oryza sativa subsp. japonica (Rice) PE=2 SV=2	BnaA09g44400D protein {ECO:0000313|EMBL:CDY21689.1} OS=Brassica napus (Rape) PE=4 SV=1	BnaA09g44400D [Brassica napus]	PREDICTED: Brassica rapa uncharacterized LOC103842672 (LOC103842672), transcript variant X2, mRNA
BnaA09g42860D	--	--	--	--	--	--	--	--	BnaA09g42860D protein {ECO:0000313|EMBL:CDY13784.1} OS=Brassica napus (Rape) PE=4 SV=1	BnaA09g42860D [Brassica napus]	PREDICTED: Brassica rapa pentatricopeptide repeat-containing protein At2g22070 (LOC103842482), mRNA
BnaA09g46520D	--	--	--	--	--	--	--	--	BnaA09g46520D protein {ECO:0000313|EMBL:CDY26625.1} OS=Brassica napus (Rape) PE=4 SV=1	BnaA09g46520D [Brassica napus]	Eutrema salsugineum hypothetical protein (EUTSA_v10007253mg) mRNA, complete cds
BnaA09g45210D	--	--	Cellular Component: cytoplasm (GO:0005737);; Biological Process: gibberellin biosynthetic process (GO:0009686);; Biological Process: response to abscisic acid (GO:0009737);; Biological Process: gibberellic acid mediated signaling pathway (GO:0009740);; Biological Process: embryo development ending in seed dormancy (GO:0009793);; Biological Process: flavonoid biosynthetic process (GO:0009813);; Bi…	--	[QR]	--	2OG-Fe(II) oxygenase superfamily;; non-haem dioxygenase in morphine synthesis N-terminal	Protein SRG1 GN=SRG1 OS=Arabidopsis thaliana (Mouse-ear cress) PE=2 SV=1	BnaA09g45210D protein {ECO:0000313|EMBL:CDY21770.1} OS=Brassica napus (Rape) PE=3 SV=1	BnaA09g45210D [Brassica napus]	PREDICTED: Brassica rapa protein SRG1-like (LOC103842818), mRNA
BnaC08g36470D	--	--	Biological Process: transition metal ion transport (GO:0000041);; Molecular Function: ubiquitin-protein ligase activity (GO:0004842);; Molecular Function: zinc ion binding (GO:0008270);; Biological Process: response to zinc ion (GO:0010043);; Biological Process: protein ubiquitination (GO:0016567);; Biological Process: lateral root development (GO:0048527);; Biological Process: root hair elongati…	--	[O]	Posttranslational modification, protein turnover, chaperones	Ring finger domain;; RING-H2 zinc finger;; Zinc finger, C3HC4 type (RING finger);; Zinc finger, C3HC4 type (RING finger);; Zinc finger, C3HC4 type (RING finger);; Anaphase-promoting complex subunit 11 RING-H2 finger	Putative RING-H2 finger protein ATL12 (Precursor) GN=ATL12 OS=Arabidopsis thaliana (Mouse-ear cress) PE=3 SV=1	BnaC08g36470D protein {ECO:0000313|EMBL:CDX81954.1} OS=Brassica napus (Rape) PE=4 SV=1	BnaC08g36470D [Brassica napus]	PREDICTED: Brassica rapa putative RING-H2 finger protein ATL12 (LOC103842617), mRNA
BnaA09g46490D	--	--	Molecular Function: ATP binding (GO:0005524);; Biological Process: defense response (GO:0006952);; Molecular Function: nucleoside-triphosphatase activity (GO:0017111);; Molecular Function: ADP binding (GO:0043531);;	--	[T]	Signal transduction mechanisms	NB-ARC domain;; AAA domain	Disease resistance protein RFL1 GN=RFL1 OS=Arabidopsis thaliana (Mouse-ear cress) PE=3 SV=2	BnaA09g46490D protein {ECO:0000313|EMBL:CDY26628.1} OS=Brassica napus (Rape) PE=4 SV=1	BnaA09g46490D [Brassica napus]	Brassica rapa subsp. pekinensis isolate BrCNL9 disease resistance protein gene, complete cds
BnaC08g44260D	--	--	--	--	--	--	--	--	BnaC08g44260D protein {ECO:0000313|EMBL:CDY10025.1} OS=Brassica napus (Rape) PE=4 SV=1	BnaC08g44260D [Brassica napus]	Brassica rapa subsp. pekinensis clone KBrH014P02, complete sequence
BnaA09g47020D	--	--	Biological Process: mRNA splicing, via spliceosome (GO:0000398);; Cellular Component: nucleus (GO:0005634);; Biological Process: rRNA processing (GO:0006364);; Biological Process: protein maturation (GO:0051604);;	--	[S]	Function unknown	Domain of unknown function (DUF947)	--	BnaA09g47020D protein {ECO:0000313|EMBL:CDY26575.1} OS=Brassica napus (Rape) PE=4 SV=1	BnaA09g47020D [Brassica napus]	PREDICTED: Brassica rapa ribosomal RNA processing protein 36 homolog (LOC103843114), mRNA
BnaA09g46700D	--	--	--	--	[R]	General function prediction only	PPR repeat family;; PPR repeat;; PPR repeat;; Pentatricopeptide repeat domain	Pentatricopeptide repeat-containing protein At3g22470, mitochondrial (Precursor) GN=At3g22470 OS=Arabidopsis thaliana (Mouse-ear cress) PE=2 SV=1	BnaA09g46700D protein {ECO:0000313|EMBL:CDY26607.1} OS=Brassica napus (Rape) PE=4 SV=1	BnaA09g46700D [Brassica napus]	PREDICTED: Brassica rapa pentatricopeptide repeat-containing protein At1g12620-like (LOC103843088), transcript variant X2, mRNA
BnaA09g43160D	[H]	Coenzyme transport and metabolism	Molecular Function: protein binding (GO:0005515);; Molecular Function: ATP binding (GO:0005524);; Cellular Component: nucleus (GO:0005634);; Cellular Component: cytosol (GO:0005829);; Cellular Component: plasmodesma (GO:0009506);; Biological Process: embryo development ending in seed dormancy (GO:0009793);; Biological Process: protein sumoylation (GO:0016925);; Molecular Function: SUMO activating…	K10685|0.0|ath:AT2G21470|SAE2	[O]	Posttranslational modification, protein turnover, chaperones	ThiF family;; Repeat in ubiquitin-activating (UBA) protein;; Ubiquitin/SUMO-activating enzyme ubiquitin-like domain;; Ubiquitin-activating enzyme active site;; Shikimate / quinate 5-dehydrogenase	SUMO-activating enzyme subunit 2 GN=F3K23.23 OS=Arabidopsis thaliana (Mouse-ear cress) PE=1 SV=1	BnaA09g43160D protein {ECO:0000313|EMBL:CDY13814.1} OS=Brassica napus (Rape) PE=4 SV=1	BnaA09g43160D [Brassica napus]	PREDICTED: Brassica rapa SUMO-activating enzyme subunit 2-like (LOC103842524), mRNA
BnaC08g39240D	[U]	Intracellular trafficking, secretion, and vesicular transport	Biological Process: RNA methylation (GO:0001510);; Molecular Function: nucleocytoplasmic transporter activity (GO:0005487);; Molecular Function: protein binding (GO:0005515);; Cellular Component: nuclear pore (GO:0005643);; Cellular Component: nucleolus (GO:0005730);; Cellular Component: plasma membrane (GO:0005886);; Biological Process: nucleocytoplasmic transport (GO:0006913);; Cellular Compone…	K14312|0.0|ath:AT1G14850|NUP155	[YU]	--	Non-repetitive/WGA-negative nucleoporin C-terminal;; Nup133 N terminal like	Nuclear pore complex protein NUP155 {ECO:0000303|PubMed:12034489} OS=Arabidopsis thaliana (Mouse-ear cress) PE=1 SV=1	BnaC08g39240D protein {ECO:0000313|EMBL:CDX81677.1} OS=Brassica napus (Rape) PE=4 SV=1	BnaC08g39240D [Brassica napus]	PREDICTED: Brassica rapa nuclear pore complex protein Nup155-like (LOC103842937), mRNA
BnaA09g42900D	--	--	Cellular Component: nucleus (GO:0005634);;	--	--	--	--	Elicitor peptide 6 (Precursor) GN=F7D8.32 OS=Arabidopsis thaliana (Mouse-ear cress) PE=3 SV=1	BnaA09g42900D protein {ECO:0000313|EMBL:CDY13788.1} OS=Brassica napus (Rape) PE=4 SV=1	BnaA09g42900D [Brassica napus]	PREDICTED: Brassica rapa elicitor peptide 6 (LOC103842485), mRNA
BnaC08g43270D	--	--	Cellular Component: mitochondrial inner membrane (GO:0005743);; Biological Process: mitochondrial proton-transporting ATP synthase complex assembly (GO:0033615);;	--	[O]	Posttranslational modification, protein turnover, chaperones	ATP10 protein	--	BnaC08g43270D protein {ECO:0000313|EMBL:CDY22693.1} OS=Brassica napus (Rape) PE=4 SV=1	BnaC08g43270D [Brassica napus]	PREDICTED: Brassica rapa mitochondrial ATPase complex subunit ATP10-like (LOC103843408), transcript variant X1, mRNA
BnaA09g49940D	--	--	--	--	--	--	--	--	BnaA09g49940D protein {ECO:0000313|EMBL:CDY06209.1} OS=Brassica napus (Rape) PE=4 SV=1	BnaA09g49940D [Brassica napus]	Brassica rapa subsp. pekinensis clone KBrB002P01, complete sequence
BnaA09g46060D	--	--	--	--	--	--	FBD	F-box/FBD/LRR-repeat protein At1g13780 GN=At1g13780 OS=Arabidopsis thaliana (Mouse-ear cress) PE=2 SV=1	BnaA09g46060D protein {ECO:0000313|EMBL:CDY33800.1} OS=Brassica napus (Rape) PE=4 SV=1	BnaA09g46060D [Brassica napus]	PREDICTED: Brassica rapa F-box/FBD/LRR-repeat protein At1g13780-like (LOC103843198), mRNA
BnaC08g37520D	--	--	Cellular Component: mitochondrion (GO:0005739);; Cellular Component: endoplasmic reticulum (GO:0005783);; Cellular Component: Golgi apparatus (GO:0005794);; Cellular Component: cis-Golgi network (GO:0005801);; Biological Process: retrograde vesicle-mediated transport, Golgi to ER (GO:0006890);; Biological Process: intra-Golgi vesicle-mediated transport (GO:0006891);; Biological Process: membrane …	--	[U]	Intracellular trafficking, secretion, and vesicular transport	Rer1 family	Protein RER1B GN=RER1B OS=Arabidopsis thaliana (Mouse-ear cress) PE=1 SV=2	BnaC08g37520D protein {ECO:0000313|EMBL:CDX81849.1} OS=Brassica napus (Rape) PE=4 SV=1	BnaC08g37520D [Brassica napus]	PREDICTED: Brassica rapa protein RER1B-like (LOC103864285), mRNA
BnaA09g44570D	[R]	General function prediction only	Cellular Component: extracellular region (GO:0005576);; Biological Process: lipid metabolic process (GO:0006629);; Molecular Function: lipase activity (GO:0016298);;	--	[I]	Lipid transport and metabolism	Partial alpha/beta-hydrolase lipase region;; Alpha/beta hydrolase family;; Alpha/beta hydrolase family	Triacylglycerol lipase 2 (Precursor) GN=LIP2 OS=Arabidopsis thaliana (Mouse-ear cress) PE=2 SV=1	BnaA09g44570D protein {ECO:0000313|EMBL:CDY21706.1} OS=Brassica napus (Rape) PE=4 SV=1	PREDICTED: uncharacterized protein LOC103842701 [Brassica rapa]	PREDICTED: Brassica rapa uncharacterized LOC103842701 (LOC103842701), mRNA
BnaC08g36360D	[MG]	--	Molecular Function: nucleotide binding (GO:0000166);; Molecular Function: catalytic activity (GO:0003824);; Cellular Component: mitochondrial respiratory chain complex I (GO:0005747);; Biological Process: ubiquitin-dependent protein catabolic process (GO:0006511);; Biological Process: response to salt stress (GO:0009651);; Biological Process: photorespiration (GO:0009853);; Molecular Function: co…	K03953|0.0|ath:AT2G20360|binding / catalytic/ coenzyme binding	[C]	Energy production and conversion	NADH(P)-binding;; NAD dependent epimerase/dehydratase family;; 3-beta hydroxysteroid dehydrogenase/isomerase family;; NmrA-like family;; RmlD substrate binding domain;; short chain dehydrogenase	NADH dehydrogenase [ubiquinone] 1 alpha subcomplex subunit 9, mitochondrial (Precursor) GN=At2g20360 OS=Arabidopsis thaliana (Mouse-ear cress) PE=1 SV=2	BnaC08g36360D protein {ECO:0000313|EMBL:CDX81965.1} OS=Brassica napus (Rape) PE=4 SV=1	BnaC08g36360D [Brassica napus]	PREDICTED: Brassica rapa NADH dehydrogenase [ubiquinone] 1 alpha subcomplex subunit 9, mitochondrial (LOC103842605), mRNA
BnaA09g48390D	[J]	Translation, ribosomal structure and biogenesis	Molecular Function: aminoacyl-tRNA editing activity (GO:0002161);; Molecular Function: leucine-tRNA ligase activity (GO:0004823);; Molecular Function: ATP binding (GO:0005524);; Cellular Component: cytosol (GO:0005829);; Biological Process: leucyl-tRNA aminoacylation (GO:0006429);; Biological Process: regulation of translational fidelity (GO:0006450);; Biological Process: spermidine biosynthetic …	K01869|0.0|ath:AT1G09620|ATP binding / aminoacyl-tRNA ligase/ leucine-tRNA ligase/ nucleotide binding (EC:6.1.1.4)	[J]	Translation, ribosomal structure and biogenesis	tRNA synthetases class I (I, L, M and V);; tRNA synthetases class I (M);; Anticodon-binding domain of tRNA;; tRNA synthetases class I (C) catalytic domain	Glucuronoxylan 4-O-methyltransferase 1 GN=GXM1 OS=Arabidopsis thaliana (Mouse-ear cress) PE=1 SV=1	BnaA09g48390D protein {ECO:0000313|EMBL:CDY06364.1} OS=Brassica napus (Rape) PE=3 SV=1	BnaA09g48390D [Brassica napus]	PREDICTED: Brassica rapa leucine--tRNA ligase, cytoplasmic-like (LOC103843342), mRNA
BnaA09g45690D	[J]	Translation, ribosomal structure and biogenesis	Molecular Function: RNA binding (GO:0003723);; Cellular Component: cytoplasm (GO:0005737);; Biological Process: response to salt stress (GO:0009651);; Molecular Function: ribonuclease T2 activity (GO:0033897);;	K01166|1e-168|ath:AT1G14210|ribonuclease T2 family protein	[A]	RNA processing and modification	Ribonuclease T2 family	Ribonuclease 1 (Precursor) GN=RNS1 OS=Arabidopsis thaliana (Mouse-ear cress) PE=1 SV=1	BnaA09g45690D protein {ECO:0000313|EMBL:CDY33763.1} OS=Brassica napus (Rape) PE=3 SV=1	BnaA09g45690D [Brassica napus]	PREDICTED: Brassica rapa ribonuclease 1 (LOC103842993), mRNA
BnaA09g51310D	[R]	General function prediction only	Molecular Function: GTP binding (GO:0005525);; Cellular Component: Golgi apparatus (GO:0005794);; Biological Process: intracellular protein transport (GO:0006886);; Biological Process: small GTPase mediated signal transduction (GO:0007264);;	K07977|1e-102|ath:AT1G02440|ATARFD1A (ADP-ribosylation factor D1A)	[U]	Intracellular trafficking, secretion, and vesicular transport	ADP-ribosylation factor family;; Signal recognition particle receptor beta subunit;; Ras family;; Miro-like protein;; 50S ribosome-binding GTPase;; Gtr1/RagA G protein conserved region	ADP-ribosylation factor 1 GN=ARF1 OS=Arabidopsis thaliana (Mouse-ear cress) PE=1 SV=2	BnaA09g51310D protein {ECO:0000313|EMBL:CDY32465.1} OS=Brassica napus (Rape) PE=4 SV=1	PREDICTED: ADP-ribosylation factor 1-like isoform X2 [Brassica rapa]	PREDICTED: Brassica rapa ADP-ribosylation factor 1-like (LOC103843753), transcript variant X2, mRNA
BnaA09g45400D	[LR]	--	Cellular Component: mitochondrion (GO:0005739);; Molecular Function: hydrolase activity (GO:0016787);;	--	[T]	Signal transduction mechanisms	NUDIX domain	Nudix hydrolase 18, mitochondrial (Precursor) GN=F10B6.26 OS=Arabidopsis thaliana (Mouse-ear cress) PE=2 SV=1	BnaA09g45400D protein {ECO:0000313|EMBL:CDY33734.1} OS=Brassica napus (Rape) PE=3 SV=1	BnaA09g45400D [Brassica napus]	PREDICTED: Brassica rapa nudix hydrolase 18, mitochondrial-like (LOC103842936), transcript variant X1, mRNA
BnaC08g38110D	[R]	General function prediction only	Molecular Function: GTPase activity (GO:0003924);; Molecular Function: GTP binding (GO:0005525);; Cellular Component: vacuolar membrane (GO:0005774);; Cellular Component: trans-Golgi network (GO:0005802);; Cellular Component: plasma membrane (GO:0005886);; Biological Process: GTP catabolic process (GO:0006184);; Biological Process: intracellular protein transport (GO:0006886);; Biological Process…	K07976|1e-149|ath:AT1G16920|ATRABA1B (ARABIDOPSIS RAB GTPASE HOMOLOG A1B)	[U]	Intracellular trafficking, secretion, and vesicular transport	Ras family;; Miro-like protein;; ADP-ribosylation factor family;; 50S ribosome-binding GTPase	Ras-related protein RABA1b GN=F6I1.7 OS=Arabidopsis thaliana (Mouse-ear cress) PE=2 SV=1	BnaC08g38110D protein {ECO:0000313|EMBL:CDX81790.1} OS=Brassica napus (Rape) PE=4 SV=1	BnaC08g38110D [Brassica napus]	PREDICTED: Brassica rapa ras-related protein RABA1b-like (LOC103842822), mRNA
BnaA09g50760D	[RTKL]	--	Molecular Function: adenosine kinase activity (GO:0004001);; Molecular Function: adenylate kinase activity (GO:0004017);; Molecular Function: protein serine/threonine kinase activity (GO:0004674);; Molecular Function: protein serine/threonine/tyrosine kinase activity (GO:0004712);; Molecular Function: copper ion binding (GO:0005507);; Molecular Function: ATP binding (GO:0005524);; Cellular Compon…	--	[T]	Signal transduction mechanisms	Protein kinase domain;; Protein tyrosine kinase	Casein kinase I isoform delta-like GN=At4g26100 OS=Arabidopsis thaliana (Mouse-ear cress) PE=2 SV=2	BnaA09g50760D protein {ECO:0000313|EMBL:CDY32520.1} OS=Brassica napus (Rape) PE=4 SV=1	BnaA09g50760D [Brassica napus]	PREDICTED: Brassica rapa casein kinase I (LOC103843678), transcript variant X2, mRNA
BnaC08g34660D	[RTKL]	--	Molecular Function: protein serine/threonine kinase activity (GO:0004674);; Molecular Function: ATP binding (GO:0005524);; Cellular Component: nucleus (GO:0005634);; Cellular Component: cytosol (GO:0005829);; Biological Process: protein phosphorylation (GO:0006468);;	K03097|0.0|ath:AT2G23070|casein kinase II alpha chain, putative	[TDK]	--	Protein kinase domain;; Protein tyrosine kinase;; Phosphotransferase enzyme family	Casein kinase II subunit alpha, chloroplastic (Precursor) GN=At2g23070 OS=Arabidopsis thaliana (Mouse-ear cress) PE=2 SV=1	BnaC08g34660D protein {ECO:0000313|EMBL:CDX76880.1} OS=Brassica napus (Rape) PE=4 SV=1	BnaC08g34660D [Brassica napus]	PREDICTED: Brassica rapa casein kinase II subunit alpha, chloroplastic-like (LOC103842445), mRNA
BnaA09g43890D	[J]	Translation, ribosomal structure and biogenesis	Molecular Function: structural constituent of ribosome (GO:0003735);; Cellular Component: mitochondrion (GO:0005739);; Biological Process: DNA-templated transcription, elongation (GO:0006354);; Biological Process: translation (GO:0006412);; Cellular Component: large ribosomal subunit (GO:0015934);;	K02926|0.0|ath:AT2G20060|ribosomal protein L4 family protein	[J]	Translation, ribosomal structure and biogenesis	Ribosomal protein L4/L1 family	50S ribosomal protein L4, chloroplastic GN=rpl4 OS=Pyropia yezoensis (Red alga) PE=3 SV=1	BnaA09g43890D protein {ECO:0000313|EMBL:CDY13887.1} OS=Brassica napus (Rape) PE=3 SV=1	BnaA09g43890D [Brassica napus]	PREDICTED: Brassica rapa 39S ribosomal protein L4, mitochondrial (LOC103842616), mRNA
BnaC08g42580D	[T]	Signal transduction mechanisms	--	--	[T]	Signal transduction mechanisms	Phosphatidylinositol-4-phosphate 5-Kinase	Putative 1-phosphatidylinositol-3-phosphate 5-kinase FAB1D GN=FAB1D OS=Arabidopsis thaliana (Mouse-ear cress) PE=3 SV=1	BnaC08g42580D protein {ECO:0000313|EMBL:CDY22624.1} OS=Brassica napus (Rape) PE=4 SV=1	BnaC08g42580D [Brassica napus]	--
BnaC08g38740D	--	--	--	--	--	--	--	--	BnaC08g38740D protein {ECO:0000313|EMBL:CDX81727.1} OS=Brassica napus (Rape) PE=4 SV=1	BnaC08g38740D [Brassica napus]	Brassica rapa subsp. pekinensis clone KBrB042O03, complete sequence
BnaC08g40330D	[G]	Carbohydrate transport and metabolism	Molecular Function: glyceraldehyde-3-phosphate dehydrogenase (NAD+) (phosphorylating) activity (GO:0004365);; Molecular Function: copper ion binding (GO:0005507);; Cellular Component: cell wall (GO:0005618);; Cellular Component: nucleolus (GO:0005730);; Cellular Component: mitochondrial envelope (GO:0005740);; Cellular Component: vacuolar membrane (GO:0005774);; Cellular Component: Golgi apparatu…	K00134|0.0|ath:AT3G04120|GAPC1	[G]	Carbohydrate transport and metabolism	Glyceraldehyde 3-phosphate dehydrogenase, C-terminal domain;; Glyceraldehyde 3-phosphate dehydrogenase, NAD binding domain;; Dihydrodipicolinate reductase, N-terminus	Glyceraldehyde-3-phosphate dehydrogenase, cytosolic GN=GAPC OS=Sinapis alba (White mustard) PE=2 SV=2	Glyceraldehyde-3-phosphate dehydrogenase {ECO:0000256|RuleBase:RU361160} OS=Brassica napus (Rape) PE=3 SV=1	BnaC08g40330D [Brassica napus]	PREDICTED: Brassica rapa glyceraldehyde-3-phosphate dehydrogenase, cytosolic-like (LOC103843050), mRNA
BnaA09g42020D	--	--	Cellular Component: cytoplasm (GO:0005737);; Biological Process: chromatin silencing (GO:0006342);; Biological Process: histone H3-K9 methylation (GO:0051567);;	--	--	--	Plant protein of unknown function (DUF869)	Filament-like plant protein 7 GN=FPP7 OS=Arabidopsis thaliana (Mouse-ear cress) PE=3 SV=2	BnaA09g42020D protein {ECO:0000313|EMBL:CDY46078.1} OS=Brassica napus (Rape) PE=4 SV=1	BnaA09g42020D [Brassica napus]	PREDICTED: Brassica rapa filament-like plant protein 7 (LOC103842417), mRNA
BnaC08g37700D	--	--	--	--	--	--	--	--	BnaC08g37700D protein {ECO:0000313|EMBL:CDX81831.1} OS=Brassica napus (Rape) PE=4 SV=1	BnaC08g37700D [Brassica napus]	Brassica rapa subsp. oleifera clone KBrB023K01, complete sequence
BnaC08g39260D	--	--	Biological Process: mitochondrial fission (GO:0000266);; Molecular Function: GTPase activity (GO:0003924);; Molecular Function: GTP binding (GO:0005525);; Cellular Component: mitochondrion (GO:0005739);; Cellular Component: plasma membrane (GO:0005886);; Cellular Component: cell cortex (GO:0005938);; Biological Process: GTP catabolic process (GO:0006184);; Cellular Component: cell plate (GO:00095…	--	[UR]	--	Dynamin central region;; Dynamin family;; Dynamin GTPase effector domain	Dynamin-related protein 1C GN=F10B6.23 OS=Arabidopsis thaliana (Mouse-ear cress) PE=1 SV=2	Uncharacterized protein {ECO:0000313|EnsemblPlants:Bra026801.1-P} OS=Brassica rapa subsp. pekinensis (Chinese cabbage) PE=3 SV=1	PREDICTED: dynamin-related protein 1C [Brassica rapa]	PREDICTED: Brassica rapa dynamin-related protein 1C (LOC103842939), mRNA
BnaA09g46360D	[J]	Translation, ribosomal structure and biogenesis	Molecular Function: aminopeptidase activity (GO:0004177);; Cellular Component: mitochondrion (GO:0005739);; Biological Process: proteolysis (GO:0006508);; Molecular Function: metalloexopeptidase activity (GO:0008235);; Cellular Component: chloroplast (GO:0009507);; Biological Process: methylglyoxal catabolic process to D-lactate (GO:0019243);; Biological Process: N-terminal protein amino acid mod…	K01265|2e-17|ath:AT1G13270|MAP1C	[O]	Posttranslational modification, protein turnover, chaperones	--	Methionine aminopeptidase 1B, chloroplastic {ECO:0000255|HAMAP-Rule:MF_03174} (Precursor) GN=MAP1B OS=Arabidopsis thaliana (Mouse-ear cress) PE=2 SV=2	BnaA09g46360D protein {ECO:0000313|EMBL:CDY26641.1} OS=Brassica napus (Rape) PE=4 SV=1	BnaA09g46360D [Brassica napus]	PREDICTED: Brassica rapa methionine aminopeptidase 1B, chloroplastic-like (LOC103843063), transcript variant X2, mRNA
BnaC08g34460D	--	--	Cellular Component: cytoplasm (GO:0005737);; Molecular Function: spermidine:sinapoyl CoA N-acyltransferase activity (GO:0080072);; Molecular Function: sinapoyl spermidine:sinapoyl CoA N-acyltransferase activity (GO:0080089);;	--	--	--	Transferase family	10-deacetylbaccatin III 10-O-acetyltransferase OS=Taxus cuspidata (Japanese yew) PE=1 SV=1	BnaC08g34460D protein {ECO:0000313|EMBL:CDX76860.1} OS=Brassica napus (Rape) PE=4 SV=1	BnaC08g34460D [Brassica napus]	PREDICTED: Brassica rapa 3'-N-debenzoyl-2'-deoxytaxol N-benzoyltransferase-like (LOC103842408), mRNA
BnaA09g48750D	--	--	Biological Process: MAPK cascade (GO:0000165);; Biological Process: defense response to oomycetes (GO:0002229);; Molecular Function: MAP kinase kinase kinase activity (GO:0004709);; Molecular Function: protein serine/threonine/tyrosine kinase activity (GO:0004712);; Molecular Function: protein binding (GO:0005515);; Molecular Function: ATP binding (GO:0005524);; Cellular Component: nucleolus (GO:…	--	[T]	Signal transduction mechanisms	Ethylene-responsive protein kinase Le-CTR1;; Protein tyrosine kinase;; Protein kinase domain;; Peptidase C13 family	Serine/threonine-protein kinase EDR1 GN=F22O13.20 OS=Arabidopsis thaliana (Mouse-ear cress) PE=1 SV=1	BnaA09g48750D protein {ECO:0000313|EMBL:CDY06328.1} OS=Brassica napus (Rape) PE=4 SV=1	BnaA09g48750D [Brassica napus]	PREDICTED: Brassica rapa serine/threonine-protein kinase EDR1 (LOC103843381), transcript variant X2, mRNA
BnaC08g40740D	[G]	Carbohydrate transport and metabolism	Molecular Function: translation initiation factor activity (GO:0003743);; Cellular Component: cytoplasm (GO:0005737);;	--	--	--	Plant specific eukaryotic initiation factor 4B	Leucine-rich repeat extensin-like protein 3 (Precursor) GN=LRX3 OS=Arabidopsis thaliana (Mouse-ear cress) PE=1 SV=1	BnaC08g40740D protein {ECO:0000313|EMBL:CDY16049.1} OS=Brassica napus (Rape) PE=4 SV=1	BnaC08g40740D [Brassica napus]	PREDICTED: Brassica rapa keratin, type II cytoskeletal 2 epidermal (LOC103843089), transcript variant X2, mRNA
BnaC08g41490D	--	--	--	--	--	--	--	--	BnaC08g41490D protein {ECO:0000313|EMBL:CDY15974.1} OS=Brassica napus (Rape) PE=4 SV=1	BnaC08g41490D [Brassica napus]	--
BnaA09g43270D	[R]	General function prediction only	Cellular Component: cytosol (GO:0005829);; Molecular Function: oxidoreductase activity (GO:0016491);; Biological Process: response to cadmium ion (GO:0046686);; Biological Process: oxidation-reduction process (GO:0055114);;	--	[R]	General function prediction only	Aldo/keto reductase family	NADP-dependent D-sorbitol-6-phosphate dehydrogenase GN=S6PDH OS=Malus domestica (Apple) PE=2 SV=1	BnaA09g43270D protein {ECO:0000313|EMBL:CDY13825.1} OS=Brassica napus (Rape) PE=4 SV=1	PREDICTED: NADP-dependent D-sorbitol-6-phosphate dehydrogenase [Brassica rapa]	PREDICTED: Brassica rapa NADP-dependent D-sorbitol-6-phosphate dehydrogenase (LOC103842543), mRNA
BnaA09g49480D	[S]	Function unknown	Biological Process: response to stimulus (GO:0050896);;	--	[R]	General function prediction only	Leucine Rich repeats (2 copies);; Leucine rich repeat;; Leucine Rich Repeat;; Leucine Rich repeat;; Leucine rich repeat;; Leucine rich repeat N-terminal domain	Receptor-like protein kinase 5 (Precursor) GN=F21O9.180 OS=Arabidopsis thaliana (Mouse-ear cress) PE=1 SV=1	BnaA09g49480D protein {ECO:0000313|EMBL:CDY06255.1} OS=Brassica napus (Rape) PE=4 SV=1	BnaA09g49480D [Brassica napus]	PREDICTED: Brassica rapa LRR receptor-like serine/threonine-protein kinase GSO1 (LOC103843534), mRNA
BnaA09g49540D	--	--	Cellular Component: nucleus (GO:0005634);;	--	[R]	General function prediction only	--	Josephin-like protein GN=At2g29640 OS=Arabidopsis thaliana (Mouse-ear cress) PE=2 SV=1	BnaA09g49540D protein {ECO:0000313|EMBL:CDY06249.1} OS=Brassica napus (Rape) PE=4 SV=1	BnaA09g49540D [Brassica napus]	Brassica rapa subsp. pekinensis clone KBrH138P04, complete sequence
BnaC08g43940D	--	--	Molecular Function: DNA binding (GO:0003677);; Molecular Function: sequence-specific DNA binding transcription factor activity (GO:0003700);; Cellular Component: nucleus (GO:0005634);; Biological Process: regulation of transcription, DNA-templated (GO:0006355);; Biological Process: ethylene-activated signaling pathway (GO:0009873);;	--	--	--	AP2 domain	Ethylene-responsive transcription factor 14 GN=F19P19.19 OS=Arabidopsis thaliana (Mouse-ear cress) PE=2 SV=1	BnaC08g43940D protein {ECO:0000313|EMBL:CDY10057.1} OS=Brassica napus (Rape) PE=4 SV=1	BnaC08g43940D [Brassica napus]	PREDICTED: Brassica rapa ethylene-responsive transcription factor 14-like (LOC103843654), mRNA
BnaA09g50790D	[O]	Posttranslational modification, protein turnover, chaperones	Biological Process: karyogamy (GO:0000741);; Cellular Component: cell wall (GO:0005618);; Cellular Component: mitochondrial respiratory chain complex I (GO:0005747);; Cellular Component: vacuolar membrane (GO:0005774);; Biological Process: ubiquitin-dependent protein catabolic process (GO:0006511);; Biological Process: nucleotide biosynthetic process (GO:0009165);; Cellular Component: chloroplast…	--	[O]	Posttranslational modification, protein turnover, chaperones	SPFH domain / Band 7 family	Prohibitin-2, mitochondrial GN=PHB2 OS=Arabidopsis thaliana (Mouse-ear cress) PE=1 SV=1	BnaA09g50790D protein {ECO:0000313|EMBL:CDY32517.1} OS=Brassica napus (Rape) PE=4 SV=1	BnaA09g50790D [Brassica napus]	PREDICTED: Brassica rapa prohibitin-2, mitochondrial-like (LOC103843682), mRNA
BnaC08g41130D	[CHR]	--	Cellular Component: cytoplasm (GO:0005737);; Biological Process: photorespiration (GO:0009853);; Molecular Function: hydroxypyruvate reductase activity (GO:0016618);; Molecular Function: glyoxylate reductase (NADP) activity (GO:0030267);; Molecular Function: NAD binding (GO:0051287);; Biological Process: oxidation-reduction process (GO:0055114);;	--	[C]	Energy production and conversion	D-isomer specific 2-hydroxyacid dehydrogenase, NAD binding domain;; D-isomer specific 2-hydroxyacid dehydrogenase, catalytic domain;; Helix-loop-helix DNA-binding domain	Glyoxylate/hydroxypyruvate reductase HPR3 GN=HPR3 OS=Arabidopsis thaliana (Mouse-ear cress) PE=2 SV=1	BnaC08g41130D protein {ECO:0000313|EMBL:CDY16010.1} OS=Brassica napus (Rape) PE=3 SV=1	BnaC08g41130D [Brassica napus]	PREDICTED: Brassica rapa transcription factor bHLH55-like (LOC103843122), mRNA
BnaA09g45300D	--	--	Molecular Function: serine-type carboxypeptidase activity (GO:0004185);; Cellular Component: extracellular region (GO:0005576);; Cellular Component: vacuole (GO:0005773);; Biological Process: proteolysis (GO:0006508);;	K09645|0.0|ath:AT1G15000|scpl50	[OE]	--	Serine carboxypeptidase	Serine carboxypeptidase-like 50 (Precursor) GN=SCPL50 OS=Arabidopsis thaliana (Mouse-ear cress) PE=2 SV=1	Carboxypeptidase {ECO:0000256|RuleBase:RU361156} OS=Brassica napus (Rape) PE=3 SV=1	BnaA09g45300D [Brassica napus]	PREDICTED: Brassica rapa serine carboxypeptidase-like 50 (LOC103843176), mRNA
BnaC08g35530D	--	--	Cellular Component: extracellular region (GO:0005576);; Cellular Component: vesicle (GO:0031982);; Biological Process: regulation of double fertilization forming a zygote and endosperm (GO:0080155);; Biological Process: regulation of protein localization to cell surface (GO:2000008);;	--	--	--	Prolamin-like	Egg cell-secreted protein 1.2 (Precursor) GN=EC1.2 OS=Arabidopsis thaliana (Mouse-ear cress) PE=2 SV=1	BnaC08g35530D protein {ECO:0000313|EMBL:CDX76967.1} OS=Brassica napus (Rape) PE=4 SV=1	BnaC08g35530D [Brassica napus]	PREDICTED: Brassica rapa egg cell-secreted protein 1.2-like (LOC103842495), mRNA
BnaC08g35380D	--	--	Cellular Component: mitochondrion (GO:0005739);;	--	[R]	General function prediction only	PPR repeat family;; PPR repeat;; PPR repeat;; Pentatricopeptide repeat domain;; DYW family of nucleic acid deaminases;; Tetratricopeptide repeat;; Tetratricopeptide repeat	Pentatricopeptide repeat-containing protein At2g22070 GN=PCMP-H41 OS=Arabidopsis thaliana (Mouse-ear cress) PE=3 SV=1	BnaC08g35380D protein {ECO:0000313|EMBL:CDX76952.1} OS=Brassica napus (Rape) PE=4 SV=1	BnaC08g35380D [Brassica napus]	Brassica rapa subsp. pekinensis clone KBrB025M01, complete sequence
BnaA09g50330D	--	--	Cellular Component: mitochondrion (GO:0005739);; Cellular Component: plasma membrane (GO:0005886);; Cellular Component: anchored component of membrane (GO:0031225);;	--	--	--	Probable lipid transfer;; Protease inhibitor/seed storage/LTP family	Protein YLS3 (Precursor) GN=YLS3 OS=Arabidopsis thaliana (Mouse-ear cress) PE=2 SV=1	BnaA09g50330D protein {ECO:0000313|EMBL:CDY06170.1} OS=Brassica napus (Rape) PE=4 SV=1	BnaA09g50330D [Brassica napus]	PREDICTED: Brassica rapa non-specific lipid-transfer protein-like protein At2g13820 (LOC103843600), transcript variant X1, mRNA
BnaA09g46570D	[Q]	Secondary metabolites biosynthesis, transport and catabolism	Molecular Function: binding (GO:0005488);; Biological Process: tryptophan catabolic process (GO:0006569);; Biological Process: protein targeting to membrane (GO:0006612);; Cellular Component: plasmodesma (GO:0009506);; Biological Process: indoleacetic acid biosynthetic process (GO:0009684);; Biological Process: positive regulation of flavonoid biosynthetic process (GO:0009963);; Biological Proces…	--	[Q]	Secondary metabolites biosynthesis, transport and catabolism	Cytochrome P450	Cytochrome P450 71B7 GN=CYP71B7 OS=Arabidopsis thaliana (Mouse-ear cress) PE=1 SV=1	BnaA09g46570D protein {ECO:0000313|EMBL:CDY26620.1} OS=Brassica napus (Rape) PE=4 SV=1	BnaA09g46570D [Brassica napus]	Arabidopsis lyrata subsp. lyrata CYP71B7, mRNA
BnaC08g36210D	[M]	Cell wall/membrane/envelope biogenesis	Molecular Function: structural molecule activity (GO:0005198);; Cellular Component: nucleus (GO:0005634);; Cellular Component: cytosol (GO:0005829);; Biological Process: N-terminal protein myristoylation (GO:0006499);; Biological Process: intracellular protein transport (GO:0006886);; Biological Process: ER to Golgi vesicle-mediated transport (GO:0006888);; Biological Process: Golgi organization …	--	--	--	Clathrin light chain	Clathrin light chain 1 GN=At2g20760 OS=Arabidopsis thaliana (Mouse-ear cress) PE=2 SV=1	BnaC08g36210D protein {ECO:0000313|EMBL:CDX81980.1} OS=Brassica napus (Rape) PE=4 SV=1	BnaC08g36210D [Brassica napus]	PREDICTED: Brassica rapa clathrin light chain 1-like (LOC103842584), mRNA
BnaC08g40960D	--	--	Biological Process: mitochondrial mRNA modification (GO:0080156);;	--	[R]	General function prediction only	PPR repeat family;; PPR repeat;; PPR repeat;; Pentatricopeptide repeat domain;; Evolutionarily conserved signalling intermediate in Toll pathway	Putative pentatricopeptide repeat-containing protein At1g12700, mitochondrial (Precursor) GN=At1g12700 OS=Arabidopsis thaliana (Mouse-ear cress) PE=3 SV=1	BnaC08g40960D protein {ECO:0000313|EMBL:CDY16027.1} OS=Brassica napus (Rape) PE=4 SV=1	BnaC08g40960D [Brassica napus]	PREDICTED: Brassica rapa putative pentatricopeptide repeat-containing protein At1g12700, mitochondrial (LOC103843107), transcript variant X1, mRNA
BnaC08g34350D	--	--	Molecular Function: sequence-specific DNA binding transcription factor activity (GO:0003700);; Cellular Component: nucleus (GO:0005634);; Biological Process: regulation of transcription, DNA-templated (GO:0006355);; Biological Process: leaf morphogenesis (GO:0009965);; Molecular Function: sequence-specific DNA binding (GO:0043565);;	--	[K]	Transcription	Associated with HOX;; Homeobox KN domain;; Homeobox domain	BEL1-like homeodomain protein 4 GN=F27L4.6 OS=Arabidopsis thaliana (Mouse-ear cress) PE=1 SV=2	BnaC08g34350D protein {ECO:0000313|EMBL:CDX76849.1} OS=Brassica napus (Rape) PE=4 SV=1	BnaC08g34350D [Brassica napus]	PREDICTED: Brassica rapa BEL1-like homeodomain protein 4 (LOC103842402), transcript variant X5, misc_RNA
BnaA09g44490D	--	--	--	--	--	--	--	--	BnaA09g44490D protein {ECO:0000313|EMBL:CDY21698.1} OS=Brassica napus (Rape) PE=4 SV=1	BnaA09g44490D [Brassica napus]	Brassica rapa subsp. pekinensis clone KBrH013B13, complete sequence
BnaC08g43710D	--	--	Cellular Component: nucleus (GO:0005634);; Biological Process: embryo development ending in seed dormancy (GO:0009793);;	--	[S]	Function unknown	--	TATA box-binding protein-associated factor RNA polymerase I subunit B GN=T17M13 OS=Arabidopsis thaliana (Mouse-ear cress) PE=1 SV=1	BnaC08g43710D protein {ECO:0000313|EMBL:CDY10080.1} OS=Brassica napus (Rape) PE=4 SV=1	BnaC08g43710D [Brassica napus]	PREDICTED: Brassica rapa TATA box-binding protein-associated factor RNA polymerase I subunit B (LOC103843672), mRNA
BnaA09g51250D	--	--	Molecular Function: binding (GO:0005488);;	K00517|3e-36|ath:AT1G01190|CYP78A8	[Q]	Secondary metabolites biosynthesis, transport and catabolism	--	Cytochrome P450 78A9 GN=CYP78A9 OS=Arabidopsis thaliana (Mouse-ear cress) PE=2 SV=1	BnaA09g51250D protein {ECO:0000313|EMBL:CDY32471.1} OS=Brassica napus (Rape) PE=4 SV=1	BnaA09g51250D [Brassica napus]	PREDICTED: Brassica rapa cytochrome P450 78A6-like (LOC103843776), mRNA
BnaC08g38670D	[J]	Translation, ribosomal structure and biogenesis	Biological Process: mitotic cell cycle (GO:0000278);; Biological Process: RNA splicing, via endonucleolytic cleavage and ligation (GO:0000394);; Molecular Function: structural constituent of ribosome (GO:0003735);; Cellular Component: mitochondrion (GO:0005739);; Biological Process: translation (GO:0006412);; Biological Process: methionine biosynthetic process (GO:0009086);; Biological Process: e…	--	[J]	Translation, ribosomal structure and biogenesis	Ribosomal protein S15	30S ribosomal protein S15, chloroplastic GN=rps15 OS=Psilotum nudum (Whisk fern) PE=3 SV=1	BnaC08g38670D protein {ECO:0000313|EMBL:CDX81734.1} OS=Brassica napus (Rape) PE=3 SV=1	BnaC08g38670D [Brassica napus]	PREDICTED: Brassica rapa uncharacterized LOC103842880 (LOC103842880), mRNA
BnaA09g50360D	[K]	Transcription	Molecular Function: DNA binding (GO:0003677);; Molecular Function: sequence-specific DNA binding transcription factor activity (GO:0003700);; Cellular Component: nucleus (GO:0005634);; Biological Process: regulation of transcription, DNA-templated (GO:0006355);; Biological Process: trichome morphogenesis (GO:0010090);; Biological Process: stomatal complex morphogenesis (GO:0010103);; Biological P…	--	--	--	START domain;; Homeobox domain	Homeobox-leucine zipper protein HDG2 GN=YUP8H12.16 OS=Arabidopsis thaliana (Mouse-ear cress) PE=2 SV=1	BnaA09g50360D protein {ECO:0000313|EMBL:CDY06167.1} OS=Brassica napus (Rape) PE=4 SV=1	BnaA09g50360D [Brassica napus]	PREDICTED: Brassica rapa homeobox-leucine zipper protein HDG2 (LOC103843620), transcript variant X5, mRNA
BnaC08g42410D	--	--	Biological Process: amino acid transmembrane transport (GO:0003333);; Molecular Function: amino acid transmembrane transporter activity (GO:0015171);; Cellular Component: integral component of membrane (GO:0016021);;	--	[E]	Amino acid transport and metabolism	Transmembrane amino acid transporter protein	Amino acid permease 8 GN=AAP8 OS=Arabidopsis thaliana (Mouse-ear cress) PE=1 SV=1	BnaC08g42410D protein {ECO:0000313|EMBL:CDY22607.1} OS=Brassica napus (Rape) PE=4 SV=1	BnaC08g42410D [Brassica napus]	PREDICTED: Brassica rapa amino acid permease 8-like (LOC103843319), transcript variant X3, mRNA
BnaA09g42940D	--	--	--	--	--	--	Plant protein of unknown function (DUF639)	--	BnaA09g42940D protein {ECO:0000313|EMBL:CDY13792.1} OS=Brassica napus (Rape) PE=4 SV=1	BnaA09g42940D [Brassica napus]	PREDICTED: Brassica rapa uncharacterized LOC103842498 (LOC103842498), partial mRNA
BnaC08g36920D	--	--	Molecular Function: DNA binding (GO:0003677);; Molecular Function: chromatin binding (GO:0003682);; Molecular Function: sequence-specific DNA binding transcription factor activity (GO:0003700);; Cellular Component: nucleus (GO:0005634);; Biological Process: regulation of transcription, DNA-templated (GO:0006355);; Biological Process: protein targeting to membrane (GO:0006612);; Biological Process…	--	--	--	Myb-like DNA-binding domain	Transcription factor MYB1R1 OS=Solanum tuberosum (Potato) PE=2 SV=1	BnaC08g36920D protein {ECO:0000313|EMBL:CDX81909.1} OS=Brassica napus (Rape) PE=4 SV=1	BnaC08g36920D [Brassica napus]	PREDICTED: Brassica rapa transcription factor MYB1R1 (LOC103842669), mRNA
BnaC08g38790D	[D]	Cell cycle control, cell division, chromosome partitioning	Biological Process: nuclear division (GO:0000280);; Biological Process: cytokinesis by cell plate formation (GO:0000911);; Cellular Component: nucleus (GO:0005634);; Biological Process: regulation of DNA replication (GO:0006275);; Biological Process: cell proliferation (GO:0008283);; Biological Process: lateral root formation (GO:0010311);; Biological Process: regulation of G2/M transition of mit…	--	[D]	Cell cycle control, cell division, chromosome partitioning	Cyclin, N-terminal domain;; Cyclin, C-terminal domain	Cyclin-A2-3 GN=T16N11.8 OS=Arabidopsis thaliana (Mouse-ear cress) PE=1 SV=2	BnaC08g38790D protein {ECO:0000313|EMBL:CDX81722.1} OS=Brassica napus (Rape) PE=3 SV=1	BnaC08g38790D [Brassica napus]	PREDICTED: Brassica rapa cyclin-A2-3-like (LOC103842893), transcript variant X3, mRNA
BnaC08g40650D	[D]	Cell cycle control, cell division, chromosome partitioning	Biological Process: petal formation (GO:0048451);; Biological Process: sepal formation (GO:0048453);; Biological Process: RNA-directed DNA methylation (GO:0080188);;	--	--	--	XH domain;; XS domain;; XS zinc finger domain	Factor of DNA methylation 4 {ECO:0000303|PubMed:22302148} OS=Arabidopsis thaliana (Mouse-ear cress) PE=4 SV=1	BnaC08g40650D protein {ECO:0000313|EMBL:CDY16058.1} OS=Brassica napus (Rape) PE=4 SV=1	BnaC08g40650D [Brassica napus]	PREDICTED: Brassica rapa uncharacterized LOC103843080 (LOC103843080), transcript variant X2, mRNA
BnaA09g45650D	[T]	Signal transduction mechanisms	Molecular Function: protein tyrosine phosphatase activity (GO:0004725);; Molecular Function: protein tyrosine/serine/threonine phosphatase activity (GO:0008138);; Biological Process: peptidyl-tyrosine dephosphorylation (GO:0035335);;	K14165|1e-112|rcu:RCOM_0692450|Dual specificity protein phosphatase, putative (EC:3.1.3.16)	[V]	Defense mechanisms	Dual specificity phosphatase, catalytic domain	Probable inactive dual specificity protein phosphatase-like At4g18593 GN=At4g18593 OS=Arabidopsis thaliana (Mouse-ear cress) PE=2 SV=1	BnaA09g45650D protein {ECO:0000313|EMBL:CDY33759.1} OS=Brassica napus (Rape) PE=4 SV=1	BnaA09g45650D [Brassica napus]	PREDICTED: Brassica rapa dual specificity protein phosphatase 12-like (LOC103842980), mRNA
BnaC08g39980D	--	--	Cellular Component: endoplasmic reticulum (GO:0005783);; Biological Process: intracellular protein transport (GO:0006886);; Molecular Function: protein transmembrane transporter activity (GO:0008320);; Cellular Component: integral component of membrane (GO:0016021);;	--	[U]	Intracellular trafficking, secretion, and vesicular transport	emp24/gp25L/p24 family/GOLD	Transmembrane emp24 domain-containing protein p24delta7 (Precursor) GN=At1g14010 OS=Arabidopsis thaliana (Mouse-ear cress) PE=2 SV=1	BnaC08g39980D protein {ECO:0000313|EMBL:CDY16125.1} OS=Brassica napus (Rape) PE=3 SV=1	BnaC08g39980D [Brassica napus]	PREDICTED: Brassica rapa transmembrane emp24 domain-containing protein p24delta7 (LOC103843009), mRNA
BnaC08g35870D	[R]	General function prediction only	Molecular Function: nucleotide binding (GO:0000166);; Molecular Function: catalytic activity (GO:0003824);; Biological Process: pentose-phosphate shunt (GO:0006098);; Cellular Component: chloroplast envelope (GO:0009941);; Biological Process: chloroplast fission (GO:0010020);; Biological Process: thylakoid membrane organization (GO:0010027);; Biological Process: carotenoid biosynthetic process (G…	K07071|1e-24|ath:AT2G21280|SULA	[F]	Nucleotide transport and metabolism	--	Epimerase family protein SDR39U1 homolog, chloroplastic {ECO:0000305} (Precursor) GN=F3K23 OS=Arabidopsis thaliana (Mouse-ear cress) PE=2 SV=2	BnaC08g35870D protein {ECO:0000313|EMBL:CDX82014.1} OS=Brassica napus (Rape) PE=4 SV=1	BnaC08g35870D [Brassica napus]	Eutrema salsugineum hypothetical protein (EUTSA_v10000221mg) mRNA, complete cds
BnaA09g45800D	--	--	Cellular Component: nucleus (GO:0005634);; Cellular Component: cytoplasm (GO:0005737);; Molecular Function: oxidoreductase activity, acting on paired donors, with incorporation or reduction of molecular oxygen, 2-oxoglutarate as one donor, and incorporation of one atom each of oxygen into both donors (GO:0016706);; Biological Process: oxidation-reduction process (GO:0055114);;	--	[QR]	--	2OG-Fe(II) oxygenase superfamily;; non-haem dioxygenase in morphine synthesis N-terminal	2-oxoglutarate-dependent dioxygenase DAO GN=OSJNBa0022H21.12 OS=Oryza sativa subsp. japonica (Rice) PE=2 SV=2	BnaA09g45800D protein {ECO:0000313|EMBL:CDY33774.1} OS=Brassica napus (Rape) PE=3 SV=1	BnaA09g45800D [Brassica napus]	PREDICTED: Brassica rapa 2-oxoglutarate-dependent dioxygenase DAO-like (LOC103842999), mRNA
BnaC08g37860D	[E]	Amino acid transport and metabolism	Biological Process: response to hypoxia (GO:0001666);; Molecular Function: L-alanine:2-oxoglutarate aminotransferase activity (GO:0004021);; Molecular Function: ATP binding (GO:0005524);; Cellular Component: mitochondrion (GO:0005739);; Cellular Component: cytosol (GO:0005829);; Cellular Component: chloroplast (GO:0009507);; Molecular Function: 1-aminocyclopropane-1-carboxylate synthase activity …	K00814|0.0|ath:AT1G17290|AlaAT1	[E]	Amino acid transport and metabolism	Aminotransferase class I and II	Alanine aminotransferase 1, mitochondrial (Precursor) GN=T13M22.3 OS=Arabidopsis thaliana (Mouse-ear cress) PE=1 SV=1	BnaC08g37860D protein {ECO:0000313|EMBL:CDX81815.1} OS=Brassica napus (Rape) PE=4 SV=1	BnaC08g37860D [Brassica napus]	PREDICTED: Brassica rapa alanine aminotransferase 1, mitochondrial (LOC103842798), mRNA
BnaA09g49570D	--	--	--	--	--	--	--	--	--	--	Brassica rapa subsp. pekinensis clone KBrH138P04, complete sequence
BnaA09g48840D	[OC]	--	Biological Process: glycerol ether metabolic process (GO:0006662);; Molecular Function: electron carrier activity (GO:0009055);; Cellular Component: chloroplast stroma (GO:0009570);; Molecular Function: protein disulfide oxidoreductase activity (GO:0015035);; Molecular Function: oxidoreductase activity, acting on a sulfur group of donors, disulfide as acceptor (GO:0016671);; Cellular Component: c…	--	[O]	Posttranslational modification, protein turnover, chaperones	Thioredoxin	Thioredoxin-like 1-1, chloroplastic (Precursor) GN=At1g08570 OS=Arabidopsis thaliana (Mouse-ear cress) PE=2 SV=1	BnaA09g48840D protein {ECO:0000313|EMBL:CDY06319.1} OS=Brassica napus (Rape) PE=4 SV=1	BnaA09g48840D [Brassica napus]	PREDICTED: Brassica rapa thioredoxin-like 1-1, chloroplastic (LOC103843391), mRNA
BnaC08g41110D	[CHR]	--	Cellular Component: cytoplasm (GO:0005737);; Biological Process: photorespiration (GO:0009853);; Molecular Function: hydroxypyruvate reductase activity (GO:0016618);; Molecular Function: glyoxylate reductase (NADP) activity (GO:0030267);; Molecular Function: NAD binding (GO:0051287);; Biological Process: oxidation-reduction process (GO:0055114);;	--	[C]	Energy production and conversion	D-isomer specific 2-hydroxyacid dehydrogenase, NAD binding domain;; D-isomer specific 2-hydroxyacid dehydrogenase, catalytic domain	Glyoxylate/hydroxypyruvate reductase HPR3 GN=HPR3 OS=Arabidopsis thaliana (Mouse-ear cress) PE=2 SV=1	BnaC08g41110D protein {ECO:0000313|EMBL:CDY16012.1} OS=Brassica napus (Rape) PE=3 SV=1	BnaC08g41110D [Brassica napus]	PREDICTED: Brassica rapa glyoxylate/hydroxypyruvate reductase HPR3-like (LOC103843120), mRNA
BnaC08g41570D	--	--	Molecular Function: Rho GDP-dissociation inhibitor activity (GO:0005094);; Cellular Component: cytoplasm (GO:0005737);; Biological Process: actin filament organization (GO:0007015);; Biological Process: plant-type cell wall modification (GO:0009827);; Biological Process: pollen tube growth (GO:0009860);;	--	[T]	Signal transduction mechanisms	RHO protein GDP dissociation inhibitor	Rho GDP-dissociation inhibitor 1 GN=GDI1 OS=Arabidopsis thaliana (Mouse-ear cress) PE=1 SV=1	BnaC08g41570D protein {ECO:0000313|EMBL:CDY15966.1} OS=Brassica napus (Rape) PE=4 SV=1	BnaC08g41570D [Brassica napus]	PREDICTED: Brassica rapa rho GDP-dissociation inhibitor 1-like (LOC103843157), mRNA
BnaC08g39750D	--	--	--	--	--	--	--	--	BnaC08g39750D protein {ECO:0000313|EMBL:CDX81626.1} OS=Brassica napus (Rape) PE=4 SV=1	BnaC08g39750D [Brassica napus]	Eutrema salsugineum hypothetical protein (EUTSA_v10008860mg) mRNA, complete cds
BnaA09g50670D	[R]	General function prediction only	Molecular Function: nucleotide binding (GO:0000166);; Biological Process: protein N-linked glycosylation (GO:0006487);;	--	[R]	General function prediction only	WD domain, G-beta repeat	Flagellar WD repeat-containing protein Pf20 GN=PF20 OS=Chlamydomonas reinhardtii (Chlamydomonas smithii) PE=2 SV=1	BnaA09g50670D protein {ECO:0000313|EMBL:CDY32529.1} OS=Brassica napus (Rape) PE=4 SV=1	BnaA09g50670D [Brassica napus]	PREDICTED: Brassica rapa uncharacterized LOC103843670 (LOC103843670), transcript variant X2, mRNA
BnaA09g46170D	--	--	Biological Process: microtubule cytoskeleton organization (GO:0000226);; Biological Process: cytokinesis by cell plate formation (GO:0000911);; Biological Process: nuclear-transcribed mRNA catabolic process (GO:0000956);; Cellular Component: nucleus (GO:0005634);; Cellular Component: cytoplasm (GO:0005737);; Biological Process: regulation of transcription, DNA-templated (GO:0006355);; Biological …	--	[R]	General function prediction only	--	Topless-related protein 2 GN=TPR2 OS=Arabidopsis thaliana (Mouse-ear cress) PE=1 SV=2	Uncharacterized protein {ECO:0000313|EnsemblPlants:Bra037598.1-P} OS=Brassica rapa subsp. pekinensis (Chinese cabbage) PE=4 SV=1	BnaA07g39190D [Brassica napus]	PREDICTED: Brassica rapa uncharacterized LOC103842712 (LOC103842712), ncRNA
BnaA09g43440D	--	--	--	--	[R]	General function prediction only	PPR repeat family;; PPR repeat;; PPR repeat;; Pentatricopeptide repeat domain;; Tetratricopeptide repeat	Pentatricopeptide repeat-containing protein At2g21090 GN=PCMP-E48 OS=Arabidopsis thaliana (Mouse-ear cress) PE=2 SV=1	BnaA09g43440D protein {ECO:0000313|EMBL:CDY13842.1} OS=Brassica napus (Rape) PE=4 SV=1	BnaA09g43440D [Brassica napus]	Brassica rapa subsp. pekinensis clone KBrB082F21, complete sequence
BnaA09g48120D	--	--	--	K14487|9e-14|ath:AT1G48670|auxin-responsive GH3 family protein	--	--	--	Probable indole-3-acetic acid-amido synthetase GH3.7 OS=Oryza sativa subsp. japonica (Rice) PE=2 SV=2	BnaA09g48120D protein {ECO:0000313|EMBL:CDY34886.1} OS=Brassica napus (Rape) PE=4 SV=1	BnaA09g48120D [Brassica napus]	PREDICTED: Brassica rapa 4-substituted benzoates-glutamate ligase GH3.12-like (LOC103843294), mRNA
BnaA09g50960D	--	--	Molecular Function: aspartic-type endopeptidase activity (GO:0004190);; Cellular Component: extracellular region (GO:0005576);; Cellular Component: Golgi apparatus (GO:0005794);; Cellular Component: cytosol (GO:0005829);; Cellular Component: plasma membrane (GO:0005886);; Biological Process: proteolysis (GO:0006508);; Cellular Component: plant-type cell wall (GO:0009505);; Cellular Component: pla…	--	[O]	Posttranslational modification, protein turnover, chaperones	Xylanase inhibitor C-terminal;; Xylanase inhibitor N-terminal	Basic 7S globulin low kDa subunit (Precursor) GN=BG OS=Glycine max (Soybean) PE=1 SV=2	BnaA09g50960D protein {ECO:0000313|EMBL:CDY32500.1} OS=Brassica napus (Rape) PE=4 SV=1	BnaA09g50960D [Brassica napus]	PREDICTED: Brassica rapa basic 7S globulin-like (LOC103843703), mRNA
BnaA09g44240D	[P]	Inorganic ion transport and metabolism	Molecular Function: N,N-dimethylaniline monooxygenase activity (GO:0004499);; Cellular Component: chloroplast (GO:0009507);; Biological Process: plant-type hypersensitive response (GO:0009626);; Biological Process: systemic acquired resistance (GO:0009627);; Biological Process: defense response signaling pathway, resistance gene-dependent (GO:0009870);; Biological Process: defense response signal…	--	[Q]	Secondary metabolites biosynthesis, transport and catabolism	Flavin-binding monooxygenase-like;; Pyridine nucleotide-disulphide oxidoreductase;; L-lysine 6-monooxygenase (NADPH-requiring);; Pyridine nucleotide-disulphide oxidoreductase;; NAD(P)-binding Rossmann-like domain;; FAD-NAD(P)-binding;; Thi4 family;; Flavin containing amine oxidoreductase	Probable flavin-containing monooxygenase 1 GN=FMO1 OS=Arabidopsis thaliana (Mouse-ear cress) PE=2 SV=1	BnaA09g44240D protein {ECO:0000313|EMBL:CDY21673.1} OS=Brassica napus (Rape) PE=4 SV=1	BnaA09g44240D [Brassica napus]	PREDICTED: Brassica rapa probable flavin-containing monooxygenase 1 (LOC103842653), mRNA
BnaC08g35620D	[O]	Posttranslational modification, protein turnover, chaperones	Cellular Component: cytoplasm (GO:0005737);; Biological Process: protein folding (GO:0006457);; Biological Process: response to stress (GO:0006950);; Molecular Function: heat shock protein binding (GO:0031072);; Molecular Function: unfolded protein binding (GO:0051082);;	--	[O]	Posttranslational modification, protein turnover, chaperones	X-domain of DnaJ-containing;; DnaJ domain	Chaperone protein dnaJ 10 GN=F28O16.7 OS=Arabidopsis thaliana (Mouse-ear cress) PE=2 SV=2	BnaC08g35620D protein {ECO:0000313|EMBL:CDX82039.1} OS=Brassica napus (Rape) PE=4 SV=1	BnaC08g35620D [Brassica napus]	PREDICTED: Brassica rapa chaperone protein dnaJ 10 (LOC103842518), transcript variant X3, mRNA
BnaC08g38360D	--	--	Cellular Component: nucleus (GO:0005634);;	--	--	--	--	--	BnaC08g38360D protein {ECO:0000313|EMBL:CDX81765.1} OS=Brassica napus (Rape) PE=4 SV=1	BnaC08g38360D [Brassica napus]	PREDICTED: Brassica rapa uncharacterized LOC103842848 (LOC103842848), mRNA
BnaC08g41620D	[R]	General function prediction only	Cellular Component: cytoplasm (GO:0005737);; Biological Process: ethylene biosynthetic process (GO:0009693);; Molecular Function: 1-aminocyclopropane-1-carboxylate oxidase activity (GO:0009815);; Molecular Function: oxidoreductase activity, acting on paired donors, with incorporation or reduction of molecular oxygen, 2-oxoglutarate as one donor, and incorporation of one atom each of oxygen into b…	K05933|0.0|ath:AT1G12010|1-aminocyclopropane-1-carboxylate oxidase, putative / ACC oxidase, putative (EC:1.14.11.9)	[QR]	--	2OG-Fe(II) oxygenase superfamily;; non-haem dioxygenase in morphine synthesis N-terminal	1-aminocyclopropane-1-carboxylate oxidase 3 GN=At1g12010 OS=Arabidopsis thaliana (Mouse-ear cress) PE=2 SV=1	BnaC08g41620D protein {ECO:0000313|EMBL:CDY34603.1} OS=Brassica napus (Rape) PE=3 SV=1	BnaC08g41620D [Brassica napus]	B.oleracea mRNA for ACC oxidase (ACC0x2)
BnaA09g47830D	[T]	Signal transduction mechanisms	Molecular Function: ATP binding (GO:0005524);; Cellular Component: nucleus (GO:0005634);; Cellular Component: plasma membrane (GO:0005886);; Molecular Function: 1-phosphatidylinositol-4-phosphate 5-kinase activity (GO:0016308);; Biological Process: phosphatidylinositol phosphorylation (GO:0046854);;	K00889|0.0|ath:AT1G10900|phosphatidylinositol-4-phosphate 5-kinase family protein	[T]	Signal transduction mechanisms	Phosphatidylinositol-4-phosphate 5-Kinase;; MORN repeat	Phosphatidylinositol 4-phosphate 5-kinase 7 GN=T19D16.18 OS=Arabidopsis thaliana (Mouse-ear cress) PE=1 SV=1	BnaA09g47830D protein {ECO:0000313|EMBL:CDY34857.1} OS=Brassica napus (Rape) PE=4 SV=1	BnaA09g47830D [Brassica napus]	PREDICTED: Brassica rapa phosphatidylinositol 4-phosphate 5-kinase 7 (LOC103843268), transcript variant X3, mRNA
BnaC08g34210D	--	--	Molecular Function: monooxygenase activity (GO:0004497);; Molecular Function: iron ion binding (GO:0005506);; Molecular Function: electron carrier activity (GO:0009055);; Molecular Function: oxidoreductase activity, acting on paired donors, with incorporation or reduction of molecular oxygen (GO:0016705);; Molecular Function: oxygen binding (GO:0019825);; Molecular Function: heme binding (GO:0020…	K00517|4e-35|ath:AT3G26220|CYP71B3	[Q]	Secondary metabolites biosynthesis, transport and catabolism	Cytochrome P450	Cytochrome P450 71B3 GN=CYP71B3 OS=Arabidopsis thaliana (Mouse-ear cress) PE=2 SV=2	BnaC08g34210D protein {ECO:0000313|EMBL:CDX76835.1} OS=Brassica napus (Rape) PE=4 SV=1	BnaC08g34210D [Brassica napus]	PREDICTED: Brassica rapa cytochrome P450 71B3-like (LOC103842434), mRNA
BnaA09g41970D	[RTKL]	--	Molecular Function: protein serine/threonine kinase activity (GO:0004674);; Molecular Function: ATP binding (GO:0005524);; Biological Process: protein phosphorylation (GO:0006468);; Molecular Function: oxidoreductase activity (GO:0016491);;	--	[T]	Signal transduction mechanisms	Protein kinase domain;; Protein tyrosine kinase	Wall-associated receptor kinase-like 14 (Precursor) GN=WAKL14 OS=Arabidopsis thaliana (Mouse-ear cress) PE=2 SV=2	BnaA09g41970D protein {ECO:0000313|EMBL:CDY46073.1} OS=Brassica napus (Rape) PE=4 SV=1	BnaA09g41970D [Brassica napus]	PREDICTED: Brassica rapa wall-associated receptor kinase-like 14 (LOC103842409), mRNA
BnaC08g41250D	--	--	Cellular Component: mitochondrion (GO:0005739);;	--	[R]	General function prediction only	PPR repeat family	Pentatricopeptide repeat-containing protein At1g12300, mitochondrial (Precursor) GN=At1g12300 OS=Arabidopsis thaliana (Mouse-ear cress) PE=2 SV=1	BnaC08g41250D protein {ECO:0000313|EMBL:CDY15998.1} OS=Brassica napus (Rape) PE=4 SV=1	BnaC08g41250D [Brassica napus]	PREDICTED: Brassica rapa pentatricopeptide repeat-containing protein At1g12620-like (LOC103843127), transcript variant X2, mRNA
BnaC08g41660D	--	--	--	--	--	--	FBD	Putative FBD-associated F-box protein At5g56700 GN=At5g56700 OS=Arabidopsis thaliana (Mouse-ear cress) PE=2 SV=2	BnaC08g41660D protein {ECO:0000313|EMBL:CDY34607.1} OS=Brassica napus (Rape) PE=4 SV=1	BnaC08g41660D [Brassica napus]	PREDICTED: Brassica rapa putative FBD-associated F-box protein At5g56700 (LOC103843504), mRNA
BnaC08g37830D	--	--	--	--	--	--	--	--	BnaC08g37830D protein {ECO:0000313|EMBL:CDX81818.1} OS=Brassica napus (Rape) PE=4 SV=1	BnaC08g37830D [Brassica napus]	--
BnaC08g43030D	--	--	Cellular Component: cytoplasm (GO:0005737);; Biological Process: iron ion transport (GO:0006826);; Biological Process: cellular response to iron ion starvation (GO:0010106);; Biological Process: response to nitrate (GO:0010167);; Biological Process: nitrate transport (GO:0015706);;	--	[F]	Nucleotide transport and metabolism	ENTH domain	--	BnaC08g43030D protein {ECO:0000313|EMBL:CDY22669.1} OS=Brassica napus (Rape) PE=4 SV=1	BnaC08g43030D [Brassica napus]	PREDICTED: Brassica rapa clathrin interactor 1 (LOC103843386), mRNA
BnaC08g39010D	--	--	Molecular Function: copper ion binding (GO:0005507);; Cellular Component: chloroplast stroma (GO:0009570);; Cellular Component: thylakoid (GO:0009579);; Cellular Component: chloroplast envelope (GO:0009941);; Molecular Function: oxidoreductase activity (GO:0016491);; Biological Process: oxidation-reduction process (GO:0055114);;	--	--	--	--	--	BnaC08g39010D protein {ECO:0000313|EMBL:CDX81700.1} OS=Brassica napus (Rape) PE=4 SV=1	BnaC08g39010D [Brassica napus]	PREDICTED: Brassica rapa fruit protein pKIWI502 (LOC103872626), partial mRNA
BnaC08g43140D	--	--	Molecular Function: copper ion binding (GO:0005507);; Cellular Component: plasma membrane (GO:0005886);; Molecular Function: electron carrier activity (GO:0009055);; Cellular Component: anchored component of membrane (GO:0031225);;	--	--	--	Plastocyanin-like domain	Blue copper protein (Precursor) OS=Pisum sativum (Garden pea) PE=2 SV=1	BnaC08g43140D protein {ECO:0000313|EMBL:CDY22680.1} OS=Brassica napus (Rape) PE=4 SV=1	BnaC08g43140D [Brassica napus]	PREDICTED: Brassica rapa early nodulin-like protein 1 (LOC103843394), mRNA
BnaA09g48280D	--	--	Cellular Component: mitochondrion (GO:0005739);; Molecular Function: carbohydrate binding (GO:0030246);;	--	--	--	--	Protein PHLOEM PROTEIN 2-LIKE A10 GN=PP2A10 OS=Arabidopsis thaliana (Mouse-ear cress) PE=2 SV=1	BnaA09g48280D protein {ECO:0000313|EMBL:CDY34902.1} OS=Brassica napus (Rape) PE=4 SV=1	BnaA09g48280D [Brassica napus]	Eutrema salsugineum hypothetical protein (EUTSA_v10007757mg) mRNA, complete cds
BnaC08g37610D	--	--	Biological Process: MAPK cascade (GO:0000165);; Molecular Function: ATP binding (GO:0005524);; Biological Process: response to cold (GO:0009409);; Biological Process: salicylic acid biosynthetic process (GO:0009697);; Biological Process: systemic acquired resistance, salicylic acid mediated signaling pathway (GO:0009862);; Biological Process: regulation of hydrogen peroxide metabolic process (GO:…	--	--	--	NB-ARC domain	Putative disease resistance protein At4g11170 GN=At4g11170 OS=Arabidopsis thaliana (Mouse-ear cress) PE=2 SV=1	BnaC08g37610D protein {ECO:0000313|EMBL:CDX81840.1} OS=Brassica napus (Rape) PE=4 SV=1	BnaC08g37610D [Brassica napus]	PREDICTED: Brassica rapa putative disease resistance protein At4g11170 (LOC103842740), mRNA
BnaC08g34610D	--	--	Cellular Component: cytoplasm (GO:0005737);; Cellular Component: plasma membrane (GO:0005886);; Biological Process: response to cold (GO:0009409);; Biological Process: response to water deprivation (GO:0009414);; Biological Process: response to abscisic acid (GO:0009737);;	--	--	--	Late embryogenesis abundant protein 18	--	BnaC08g34610D protein {ECO:0000313|EMBL:CDX76875.1} OS=Brassica napus (Rape) PE=4 SV=1	BnaC08g34610D [Brassica napus]	PREDICTED: Brassica rapa uncharacterized LOC103842441 (LOC103842441), mRNA
BnaC08g39360D	[G]	Carbohydrate transport and metabolism	Molecular Function: hydrolase activity, hydrolyzing O-glycosyl compounds (GO:0004553);; Cellular Component: cell wall (GO:0005618);; Biological Process: cellular glucan metabolic process (GO:0006073);; Biological Process: phloem or xylem histogenesis (GO:0010087);; Biological Process: fruit development (GO:0010154);; Molecular Function: xyloglucan:xyloglucosyl transferase activity (GO:0016762);; …	K08235|0.0|ath:AT1G14720|XTR2	--	--	Glycosyl hydrolases family 16;; Xyloglucan endo-transglycosylase (XET) C-terminus	Probable xyloglucan endotransglucosylase/hydrolase protein 28 (Precursor) OS=Arabidopsis thaliana (Mouse-ear cress) PE=2 SV=1	Xyloglucan endotransglucosylase/hydrolase {ECO:0000256|RuleBase:RU361120} OS=Brassica napus (Rape) PE=3 SV=1	BnaC08g39360D [Brassica napus]	PREDICTED: Brassica rapa probable xyloglucan endotransglucosylase/hydrolase protein 28 (LOC103842948), mRNA
BnaC08g38400D	[DKT]	--	Cellular Component: Golgi apparatus (GO:0005794);; Cellular Component: plasma membrane (GO:0005886);; Biological Process: amino acid transport (GO:0006865);; Cellular Component: chloroplast thylakoid lumen (GO:0009543);; Biological Process: plant-type cell wall modification (GO:0009827);; Biological Process: pollen tube growth (GO:0009860);;	--	[DKT]	--	LEM3 (ligand-effect modulator 3) family / CDC50 family	Putative ALA-interacting subunit 4 GN=ALIS4 OS=Arabidopsis thaliana (Mouse-ear cress) PE=2 SV=2	BnaC08g38400D protein {ECO:0000313|EMBL:CDX81761.1} OS=Brassica napus (Rape) PE=4 SV=1	BnaC08g38400D [Brassica napus]	PREDICTED: Brassica rapa putative ALA-interacting subunit 4 (LOC103842852), mRNA
BnaA09g50000D	[BK]	--	Biological Process: nuclear-transcribed mRNA catabolic process (GO:0000956);; Molecular Function: DNA binding (GO:0003677);; Biological Process: DNA mediated transformation (GO:0009294);; Biological Process: positive regulation of mitotic cell cycle (GO:0045931);; Biological Process: root development (GO:0048364);;	--	[K]	Transcription	Bromodomain	Transcription factor GTE4 GN=GTE4 OS=Arabidopsis thaliana (Mouse-ear cress) PE=2 SV=1	BnaA09g50000D protein {ECO:0000313|EMBL:CDY06203.1} OS=Brassica napus (Rape) PE=4 SV=1	BnaA09g50000D [Brassica napus]	PREDICTED: Brassica rapa transcription factor GTE4-like (LOC103843564), transcript variant X2, mRNA
BnaC08g43390D	[KL]	--	Cellular Component: nucleus (GO:0005634);; Biological Process: maintenance of chromatin silencing (GO:0006344);; Biological Process: methylation (GO:0032259);; Molecular Function: protein homodimerization activity (GO:0042803);;	--	[K]	Transcription	--	Helicase protein MOM1 GN=T6D22.14 OS=Arabidopsis thaliana (Mouse-ear cress) PE=1 SV=1	BnaC08g43390D protein {ECO:0000313|EMBL:CDY22705.1} OS=Brassica napus (Rape) PE=4 SV=1	BnaC08g43390D [Brassica napus]	PREDICTED: Brassica rapa helicase protein MOM1-like (LOC103843417), transcript variant X1, mRNA
BnaC08g35540D	[R]	General function prediction only	Molecular Function: nucleotide binding (GO:0000166);; Biological Process: defense response to insect (GO:0002213);; Molecular Function: glutamate-cysteine ligase activity (GO:0004357);; Biological Process: gluconeogenesis (GO:0006094);; Biological Process: glycolysis (GO:0006096);; Biological Process: glutathione biosynthetic process (GO:0006750);; Molecular Function: zinc ion binding (GO:0008270…	K00083|0.0|ath:AT2G21730|CAD2	[Q]	Secondary metabolites biosynthesis, transport and catabolism	Alcohol dehydrogenase GroES-like domain;; Zinc-binding dehydrogenase	Cinnamyl alcohol dehydrogenase 2 GN=F7D8.5 OS=Arabidopsis thaliana (Mouse-ear cress) PE=1 SV=1	BnaC08g35540D protein {ECO:0000313|EMBL:CDX76968.1} OS=Brassica napus (Rape) PE=4 SV=1	BnaC08g35540D [Brassica napus]	PREDICTED: Brassica rapa cinnamyl alcohol dehydrogenase 2 (LOC103842497), mRNA
BnaA09g43290D	--	--	--	--	--	--	Domain of unknown function (DUF1985)	--	BnaA09g43290D protein {ECO:0000313|EMBL:CDY13827.1} OS=Brassica napus (Rape) PE=4 SV=1	BnaA09g43290D [Brassica napus]	Brassica rapa subsp. pekinensis clone KBrB082F21, complete sequence
BnaC08g34470D	--	--	Cellular Component: cytoplasm (GO:0005737);; Molecular Function: spermidine:sinapoyl CoA N-acyltransferase activity (GO:0080072);; Molecular Function: sinapoyl spermidine:sinapoyl CoA N-acyltransferase activity (GO:0080089);;	--	--	--	Transferase family	3&apos;-N-debenzoyl-2&apos;-deoxytaxol N-benzoyltransferase GN=TAX10 OS=Taxus canadensis (Canadian yew) PE=1 SV=1	BnaC08g34470D protein {ECO:0000313|EMBL:CDX76861.1} OS=Brassica napus (Rape) PE=4 SV=1	BnaC08g34470D [Brassica napus]	PREDICTED: Brassica rapa 3'-N-debenzoyl-2'-deoxytaxol N-benzoyltransferase-like (LOC103842408), mRNA
BnaA09g45710D	--	--	Cellular Component: nucleus (GO:0005634);; Biological Process: protein folding (GO:0006457);; Molecular Function: zinc ion binding (GO:0008270);; Biological Process: response to heat (GO:0009408);; Biological Process: response to high light intensity (GO:0009644);; Biological Process: response to endoplasmic reticulum stress (GO:0034976);; Biological Process: response to hydrogen peroxide (GO:004…	--	[O]	Posttranslational modification, protein turnover, chaperones	Ring finger domain;; Zinc finger, C3HC4 type (RING finger);; Zinc finger, C3HC4 type (RING finger);; RING-H2 zinc finger;; Zinc finger, C3HC4 type (RING finger);; Anaphase-promoting complex subunit 11 RING-H2 finger	E3 ubiquitin-protein ligase RING1-like GN=At3g19950 OS=Arabidopsis thaliana (Mouse-ear cress) PE=1 SV=1	BnaA09g45710D protein {ECO:0000313|EMBL:CDY33765.1} OS=Brassica napus (Rape) PE=4 SV=1	BnaA09g45710D [Brassica napus]	PREDICTED: Brassica rapa E3 ubiquitin-protein ligase RING1 (LOC103842990), mRNA
BnaC08g43790D	--	--	--	K11430|1e-14|ath:AT1G02580|MEA	[K]	Transcription	SET domain	Histone-lysine N-methyltransferase MEDEA GN=At1g02580 OS=Arabidopsis thaliana (Mouse-ear cress) PE=1 SV=1	BnaC08g43790D protein {ECO:0000313|EMBL:CDY10072.1} OS=Brassica napus (Rape) PE=4 SV=1	BnaC08g43790D [Brassica napus]	PREDICTED: Brassica rapa histone-lysine N-methyltransferase MEDEA-like (LOC103843745), transcript variant X3, mRNA
BnaA09g45530D	--	--	--	--	[D]	Cell cycle control, cell division, chromosome partitioning	Replication factor-A C terminal domain	Replication protein A 70 kDa DNA-binding subunit D GN=MSL3.14 OS=Arabidopsis thaliana (Mouse-ear cress) PE=2 SV=1	BnaA09g45530D protein {ECO:0000313|EMBL:CDY33747.1} OS=Brassica napus (Rape) PE=4 SV=1	BnaA09g45530D [Brassica napus]	PREDICTED: Brassica rapa uncharacterized LOC103846113 (LOC103846113), mRNA
BnaA09g45510D	[G]	Carbohydrate transport and metabolism	Molecular Function: hydrolase activity, hydrolyzing O-glycosyl compounds (GO:0004553);; Cellular Component: cell wall (GO:0005618);; Biological Process: cellular glucan metabolic process (GO:0006073);; Biological Process: phloem or xylem histogenesis (GO:0010087);; Biological Process: fruit development (GO:0010154);; Molecular Function: xyloglucan:xyloglucosyl transferase activity (GO:0016762);; …	K08235|0.0|ath:AT1G14720|XTR2	--	--	Glycosyl hydrolases family 16;; Xyloglucan endo-transglycosylase (XET) C-terminus	Probable xyloglucan endotransglucosylase/hydrolase protein 28 (Precursor) OS=Arabidopsis thaliana (Mouse-ear cress) PE=2 SV=1	Xyloglucan endotransglucosylase/hydrolase {ECO:0000256|RuleBase:RU361120} OS=Brassica napus (Rape) PE=3 SV=1	BnaA09g45510D [Brassica napus]	PREDICTED: Brassica rapa probable xyloglucan endotransglucosylase/hydrolase protein 28 (LOC103842948), mRNA
BnaC08g40120D	--	--	--	--	[R]	General function prediction only	--	Pentatricopeptide repeat-containing protein At1g12775, mitochondrial (Precursor) GN=At1g12775 OS=Arabidopsis thaliana (Mouse-ear cress) PE=2 SV=1	BnaC08g40120D protein {ECO:0000313|EMBL:CDY16111.1} OS=Brassica napus (Rape) PE=4 SV=1	BnaC08g40120D [Brassica napus]	PREDICTED: Brassica rapa pentatricopeptide repeat-containing protein At1g12300, mitochondrial-like (LOC103843108), transcript variant X2, mRNA
BnaA09g44110D	--	--	Cellular Component: chloroplast (GO:0009507);;	--	--	--	--	--	BnaA09g44110D protein {ECO:0000313|EMBL:CDY21660.1} OS=Brassica napus (Rape) PE=4 SV=1	BnaA09g44110D [Brassica napus]	PREDICTED: Brassica rapa uncharacterized LOC103842636 (LOC103842636), mRNA
BnaC08g41850D	--	--	Cellular Component: nucleus (GO:0005634);; Molecular Function: oxidoreductase activity, acting on paired donors, with incorporation or reduction of molecular oxygen, 2-oxoglutarate as one donor, and incorporation of one atom each of oxygen into both donors (GO:0016706);; Biological Process: oxidation-reduction process (GO:0055114);;	K10765|0.0|ath:AT1G11780|oxidoreductase, 2OG-Fe(II) oxygenase family protein	[A]	RNA processing and modification	2OG-Fe(II) oxygenase superfamily	Alpha-ketoglutarate-dependent dioxygenase alkB GN=At1g11780 OS=Arabidopsis thaliana (Mouse-ear cress) PE=2 SV=2	BnaC08g41850D protein {ECO:0000313|EMBL:CDY34626.1} OS=Brassica napus (Rape) PE=4 SV=1	BnaC08g41850D [Brassica napus]	PREDICTED: Brassica rapa alpha-ketoglutarate-dependent dioxygenase alkB (LOC103843224), mRNA
BnaC08g39120D	--	--	--	--	--	--	--	--	BnaC08g39120D protein {ECO:0000313|EMBL:CDX81689.1} OS=Brassica napus (Rape) PE=4 SV=1	BnaC08g39120D [Brassica napus]	PREDICTED: Brassica rapa uncharacterized LOC103842927 (LOC103842927), mRNA
BnaA09g50430D	--	--	Cellular Component: nucleus (GO:0005634);;	--	--	--	PLAT/LH2 domain	--	BnaA09g50430D protein {ECO:0000313|EMBL:CDY06160.1} OS=Brassica napus (Rape) PE=4 SV=1	BnaA09g50430D [Brassica napus]	PREDICTED: Brassica rapa uncharacterized LOC103855281 (LOC103855281), mRNA
BnaC08g41720D	--	--	Molecular Function: aspartic-type endopeptidase activity (GO:0004190);; Cellular Component: extracellular region (GO:0005576);; Cellular Component: vacuole (GO:0005773);; Cellular Component: cytosol (GO:0005829);; Biological Process: glycolysis (GO:0006096);; Biological Process: proteolysis (GO:0006508);; Biological Process: protein targeting to vacuole (GO:0006623);; Biological Process: lipid me…	K08245|0.0|ath:AT1G11910|aspartyl protease family protein	[O]	Posttranslational modification, protein turnover, chaperones	Eukaryotic aspartyl protease;; Saposin-like type B, region 2;; Saposin-like type B, region 1;; Xylanase inhibitor N-terminal	Aspartic proteinase A1 (Precursor) GN=F12F1.24 OS=Arabidopsis thaliana (Mouse-ear cress) PE=1 SV=1	BnaC08g41720D protein {ECO:0000313|EMBL:CDY34613.1} OS=Brassica napus (Rape) PE=3 SV=1	aspartic protease [Brassica napus]	PREDICTED: Brassica rapa aspartic proteinase A1 (LOC103843214), mRNA
BnaA09g49070D	--	--	Cellular Component: nucleus (GO:0005634);; Biological Process: maintenance of chromatin silencing (GO:0006344);; Biological Process: methylation (GO:0032259);; Molecular Function: protein homodimerization activity (GO:0042803);;	--	[K]	Transcription	--	Helicase protein MOM1 GN=T6D22.14 OS=Arabidopsis thaliana (Mouse-ear cress) PE=1 SV=1	BnaA09g49070D protein {ECO:0000313|EMBL:CDY06296.1} OS=Brassica napus (Rape) PE=4 SV=1	BnaA09g49070D [Brassica napus]	PREDICTED: Brassica rapa helicase protein MOM1-like (LOC103843417), transcript variant X2, mRNA
BnaC08g34680D	--	--	Cellular Component: intracellular part (GO:0044424);;	--	--	--	--	--	BnaC08g34680D protein {ECO:0000313|EMBL:CDX76882.1} OS=Brassica napus (Rape) PE=4 SV=1	BnaC08g34680D [Brassica napus]	PREDICTED: Brassica rapa lipoxygenase homology domain-containing protein 1-like (LOC103842473), mRNA
BnaA09g47410D	--	--	Biological Process: cell morphogenesis involved in differentiation (GO:0000904);; Molecular Function: structural constituent of cell wall (GO:0005199);; Cellular Component: plant-type cell wall (GO:0009505);; Cellular Component: plasmodesma (GO:0009506);; Biological Process: unidimensional cell growth (GO:0009826);; Molecular Function: histidine phosphotransfer kinase activity (GO:0009927);; Biol…	--	--	--	Leucine Rich repeats (2 copies);; Leucine rich repeat;; Leucine Rich Repeat;; Leucine rich repeat N-terminal domain	Leucine-rich repeat extensin-like protein 1 (Precursor) GN=LRX1 OS=Arabidopsis thaliana (Mouse-ear cress) PE=1 SV=1	BnaA09g47410D protein {ECO:0000313|EMBL:CDY26536.1} OS=Brassica napus (Rape) PE=4 SV=1	BnaA09g47410D [Brassica napus]	PREDICTED: Brassica rapa leucine-rich repeat extensin-like protein 1 (LOC103843159), mRNA
BnaA09g51100D	[O]	Posttranslational modification, protein turnover, chaperones	Molecular Function: glutathione transferase activity (GO:0004364);; Cellular Component: cytoplasm (GO:0005737);; Biological Process: toxin catabolic process (GO:0009407);;	K00799|1e-139|ath:AT1G02950|ATGSTF4 (GLUTATHIONE S-TRANSFERASE F4)	[O]	Posttranslational modification, protein turnover, chaperones	Glutathione S-transferase, N-terminal domain;; Glutathione S-transferase, N-terminal domain;; Glutathione S-transferase, C-terminal domain;; Glutathione S-transferase, N-terminal domain;; Glutathione S-transferase, C-terminal domain	Glutathione S-transferase F4 GN=F22D16.5 OS=Arabidopsis thaliana (Mouse-ear cress) PE=2 SV=1	BnaA09g51100D protein {ECO:0000313|EMBL:CDY32486.1} OS=Brassica napus (Rape) PE=3 SV=1	BnaA09g51100D [Brassica napus]	PREDICTED: Brassica rapa glutathione S-transferase F4-like (LOC103843727), mRNA
BnaC08g44410D	--	--	--	--	--	--	--	--	BnaC08g44410D protein {ECO:0000313|EMBL:CDY10010.1} OS=Brassica napus (Rape) PE=4 SV=1	BnaC08g44410D [Brassica napus]	--
BnaC08g39700D	--	--	Cellular Component: nucleus (GO:0005634);; Cellular Component: chloroplast (GO:0009507);; Biological Process: response to symbiotic fungus (GO:0009610);; Biological Process: cellular response to phosphate starvation (GO:0016036);; Biological Process: galactolipid biosynthetic process (GO:0019375);; Biological Process: cellular response to water deprivation (GO:0042631);;	--	[R]	General function prediction only	Kelch motif;; Kelch motif;; Galactose oxidase, central domain;; Galactose oxidase, central domain;; Kelch motif	F-box/kelch-repeat protein SKIP11 GN=SKIP11 OS=Arabidopsis thaliana (Mouse-ear cress) PE=1 SV=2	BnaC08g39700D protein {ECO:0000313|EMBL:CDX81631.1} OS=Brassica napus (Rape) PE=4 SV=1	BnaC08g39700D [Brassica napus]	PREDICTED: Brassica rapa F-box/kelch-repeat protein SKIP11-like (LOC103842976), transcript variant X1, mRNA
BnaC08g42400D	[EH]	--	Cellular Component: extracellular region (GO:0005576);; Biological Process: carbohydrate metabolic process (GO:0005975);; Biological Process: endoplasmic reticulum unfolded protein response (GO:0030968);; Molecular Function: endo-1,4-beta-xylanase activity (GO:0031176);; Molecular Function: cation binding (GO:0043169);;	--	--	--	Carbohydrate binding domain;; Glycosyl hydrolase family 10;; Aminotransferase class IV	Branched-chain-amino-acid aminotransferase 2, chloroplastic (Precursor) GN=BCAT2 OS=Arabidopsis thaliana (Mouse-ear cress) PE=1 SV=1	BnaC08g42400D protein {ECO:0000313|EMBL:CDY22606.1} OS=Brassica napus (Rape) PE=4 SV=1	BnaC08g42400D [Brassica napus]	PREDICTED: Brassica rapa uncharacterized LOC103843318 (LOC103843318), transcript variant X1, mRNA
BnaC08g38350D	--	--	Cellular Component: cytoplasm (GO:0005737);; Biological Process: response to auxin (GO:0009733);; Biological Process: positive gravitropism (GO:0009958);; Biological Process: cell growth (GO:0016049);; Biological Process: auxin transport (GO:0060918);; Biological Process: root radial pattern formation (GO:0090057);;	K14488|1e-77|ath:AT1G16510|auxin-responsive family protein	--	--	Auxin responsive protein	Auxin-induced protein X15 OS=Glycine max (Soybean) PE=2 SV=1	BnaC08g38350D protein {ECO:0000313|EMBL:CDX81766.1} OS=Brassica napus (Rape) PE=4 SV=1	BnaC08g38350D [Brassica napus]	PREDICTED: Brassica rapa auxin-induced protein 15A-like (LOC103842847), mRNA
BnaA09g45840D	--	--	Cellular Component: Golgi apparatus (GO:0005794);; Molecular Function: galactoside 2-alpha-L-fucosyltransferase activity (GO:0008107);; Cellular Component: membrane (GO:0016020);; Biological Process: fucosylation (GO:0036065);; Biological Process: cell wall biogenesis (GO:0042546);;	K13681|0.0|ath:AT1G14080|FUT6	--	--	Xyloglucan fucosyltransferase	Fucosyltransferase 6 GN=FUT6 OS=Arabidopsis thaliana (Mouse-ear cress) PE=2 SV=1	BnaA09g45840D protein {ECO:0000313|EMBL:CDY33778.1} OS=Brassica napus (Rape) PE=4 SV=1	BnaA09g45840D [Brassica napus]	PREDICTED: Brassica rapa fucosyltransferase 6-like (LOC103843001), mRNA
BnaA09g49450D	--	--	--	K14424|3e-08|ath:AT1G07420|SMO2-1	[I]	Lipid transport and metabolism	--	Methylsterol monooxygenase 2-2 GN=F22G5.23 OS=Arabidopsis thaliana (Mouse-ear cress) PE=2 SV=1	BnaA09g49450D protein {ECO:0000313|EMBL:CDY06258.1} OS=Brassica napus (Rape) PE=4 SV=1	BnaA09g49450D [Brassica napus]	Brassica rapa subsp. pekinensis clone KBrH138P04, complete sequence
BnaC08g42640D	[J]	Translation, ribosomal structure and biogenesis	Molecular Function: aminoacyl-tRNA editing activity (GO:0002161);; Molecular Function: leucine-tRNA ligase activity (GO:0004823);; Molecular Function: ATP binding (GO:0005524);; Cellular Component: cytosol (GO:0005829);; Biological Process: leucyl-tRNA aminoacylation (GO:0006429);; Biological Process: regulation of translational fidelity (GO:0006450);; Biological Process: spermidine biosynthetic …	K01869|0.0|ath:AT1G09620|ATP binding / aminoacyl-tRNA ligase/ leucine-tRNA ligase/ nucleotide binding (EC:6.1.1.4)	[J]	Translation, ribosomal structure and biogenesis	tRNA synthetases class I (I, L, M and V);; tRNA synthetases class I (M);; Anticodon-binding domain of tRNA;; tRNA synthetases class I (C) catalytic domain	Glucuronoxylan 4-O-methyltransferase 1 GN=GXM1 OS=Arabidopsis thaliana (Mouse-ear cress) PE=1 SV=1	BnaC08g42640D protein {ECO:0000313|EMBL:CDY22630.1} OS=Brassica napus (Rape) PE=3 SV=1	BnaC08g42640D [Brassica napus]	PREDICTED: Brassica rapa leucine--tRNA ligase, cytoplasmic-like (LOC103843342), mRNA
BnaA09g41880D	[R]	General function prediction only	Biological Process: chromatin silencing (GO:0006342);; Cellular Component: intracellular organelle (GO:0043229);; Molecular Function: sequence-specific DNA binding (GO:0043565);; Molecular Function: metal ion binding (GO:0046872);; Biological Process: regulation of histone H3-K9 dimethylation (GO:1900109);;	--	[BK]	--	SET domain	Histone-lysine N-methyltransferase SUVR5 GN=F27L4.9/F27L4.8/F27L4.7 OS=Arabidopsis thaliana (Mouse-ear cress) PE=1 SV=3	BnaA09g41880D protein {ECO:0000313|EMBL:CDY46064.1} OS=Brassica napus (Rape) PE=4 SV=1	BnaA09g41880D [Brassica napus]	PREDICTED: Brassica rapa histone-lysine N-methyltransferase SUVR5-like (LOC103842436), mRNA
BnaC08g39940D	[T]	Signal transduction mechanisms	Cellular Component: plasma membrane (GO:0005886);; Biological Process: phosphate ion transport (GO:0006817);; Cellular Component: integral component of membrane (GO:0016021);; Biological Process: cellular response to phosphate starvation (GO:0016036);;	--	[U]	Intracellular trafficking, secretion, and vesicular transport	EXS family;; SPX domain	Phosphate transporter PHO1 homolog 3 OS=Arabidopsis thaliana (Mouse-ear cress) PE=2 SV=2	BnaC08g39940D protein {ECO:0000313|EMBL:CDY16129.1} OS=Brassica napus (Rape) PE=4 SV=1	BnaC08g39940D [Brassica napus]	PREDICTED: Brassica rapa phosphate transporter PHO1 homolog 3-like (LOC103843006), transcript variant X2, mRNA
BnaA09g43960D	--	--	Molecular Function: ubiquitin-protein ligase activity (GO:0004842);; Cellular Component: nucleus (GO:0005634);; Biological Process: ubiquitin-dependent protein catabolic process (GO:0006511);;	--	--	--	F-box domain	Putative F-box protein At2g04810 GN=At2g04810 OS=Arabidopsis thaliana (Mouse-ear cress) PE=4 SV=1	BnaA09g43960D protein {ECO:0000313|EMBL:CDY13894.1} OS=Brassica napus (Rape) PE=4 SV=1	BnaA09g43960D [Brassica napus]	PREDICTED: Brassica rapa putative F-box protein At2g04810 (LOC103842621), mRNA
BnaC08g40540D	--	--	--	--	[R]	General function prediction only	zinc-binding in reverse transcriptase	Putative ribonuclease H protein At1g65750 GN=At1g65750 OS=Arabidopsis thaliana (Mouse-ear cress) PE=3 SV=1	BnaC08g40540D protein {ECO:0000313|EMBL:CDY16069.1} OS=Brassica napus (Rape) PE=4 SV=1	BnaC08g40540D [Brassica napus]	Brassica napus clone JBnB015G17, complete sequence
BnaC08g41480D	--	--	--	--	--	--	--	--	BnaC08g41480D protein {ECO:0000313|EMBL:CDY15975.1} OS=Brassica napus (Rape) PE=4 SV=1	BnaC08g41480D [Brassica napus]	Brassica rapa subsp. pekinensis clone KBrH014A02, complete sequence
BnaA09g49760D	[M]	Cell wall/membrane/envelope biogenesis	Cellular Component: Golgi apparatus (GO:0005794);; Biological Process: carbohydrate biosynthetic process (GO:0016051);; Molecular Function: polygalacturonate 4-alpha-galacturonosyltransferase activity (GO:0047262);;	K13648|0.0|ath:AT1G06780|GAUT6	--	--	Glycosyl transferase family 8	Probable galacturonosyltransferase 6 GN=GAUT6 OS=Arabidopsis thaliana (Mouse-ear cress) PE=2 SV=1	BnaA09g49760D protein {ECO:0000313|EMBL:CDY06227.1} OS=Brassica napus (Rape) PE=4 SV=1	BnaA09g49760D [Brassica napus]	PREDICTED: Brassica rapa probable galacturonosyltransferase 6 (LOC103843495), transcript variant X3, mRNA
BnaC08g39350D	--	--	--	--	[R]	General function prediction only	Domain of unknown function (DUF4283);; Zinc knuckle	--	BnaC08g39350D protein {ECO:0000313|EMBL:CDX81666.1} OS=Brassica napus (Rape) PE=4 SV=1	BnaC08g39350D [Brassica napus]	--
BnaA09g43940D	--	--	Cellular Component: Golgi apparatus (GO:0005794);; Molecular Function: ceramide glucosyltransferase activity (GO:0008120);;	--	[IM]	--	Glycosyl transferase family 21;; Glycosyltransferase like family 2;; Glycosyl transferase family 2	--	BnaA09g43940D protein {ECO:0000313|EMBL:CDY13892.1} OS=Brassica napus (Rape) PE=4 SV=1	BnaA09g43940D [Brassica napus]	PREDICTED: Brassica rapa uncharacterized LOC103842619 (LOC103842619), mRNA
BnaC08g35520D	--	--	Cellular Component: nucleus (GO:0005634);; Biological Process: fatty acid catabolic process (GO:0009062);;	--	--	--	--	--	BnaC08g35520D protein {ECO:0000313|EMBL:CDX76966.1} OS=Brassica napus (Rape) PE=4 SV=1	BnaC08g35520D [Brassica napus]	PREDICTED: Brassica rapa uncharacterized LOC103842494 (LOC103842494), mRNA
BnaC08g38250D	--	--	--	--	[K]	Transcription	--	Histone acetyltransferase HAC1 OS=Arabidopsis thaliana (Mouse-ear cress) PE=1 SV=2	BnaC08g38250D protein {ECO:0000313|EMBL:CDX81776.1} OS=Brassica napus (Rape) PE=4 SV=1	BnaC08g38250D [Brassica napus]	PREDICTED: Brassica rapa histone acetyltransferase HAC12-like (LOC103842835), mRNA
BnaA09g42570D	--	--	Biological Process: mitotic cell cycle (GO:0000278);; Molecular Function: protein binding (GO:0005515);; Cellular Component: nucleus (GO:0005634);; Biological Process: response to sucrose (GO:0009744);; Biological Process: stomatal lineage progression (GO:0010440);; Molecular Function: cyclin-dependent protein serine/threonine kinase regulator activity (GO:0016538);; Biological Process: DNA endor…	--	[D]	Cell cycle control, cell division, chromosome partitioning	Cyclin, N-terminal domain;; Cyclin, C-terminal domain	Cyclin-D2-1 GN=F14M13.11 OS=Arabidopsis thaliana (Mouse-ear cress) PE=1 SV=3	BnaA09g42570D protein {ECO:0000313|EMBL:CDY13755.1} OS=Brassica napus (Rape) PE=3 SV=1	BnaA09g42570D [Brassica napus]	PREDICTED: Brassica rapa cyclin-D2-1 (LOC103837887), mRNA
BnaA09g49410D	[K]	Transcription	Molecular Function: sequence-specific DNA binding transcription factor activity (GO:0003700);; Cellular Component: transcription factor TFIIA complex (GO:0005672);; Biological Process: transcription initiation from RNA polymerase II promoter (GO:0006367);;	K03122|0.0|ath:AT1G07480|transcription factor IIA large subunit / TFIIA large subunit (TFIIA-L)	[K]	Transcription	Transcription factor IIA, alpha/beta subunit	--	BnaA09g49410D protein {ECO:0000313|EMBL:CDY06262.1} OS=Brassica napus (Rape) PE=4 SV=1	BnaA09g49410D [Brassica napus]	PREDICTED: Brassica rapa transcription initiation factor IIA large subunit-like (LOC103843455), transcript variant X1, mRNA
BnaA09g43870D	--	--	--	--	--	--	--	Nudix hydrolase 3 GN=F20B17.11 OS=Arabidopsis thaliana (Mouse-ear cress) PE=1 SV=1	BnaA09g43870D protein {ECO:0000313|EMBL:CDY13885.1} OS=Brassica napus (Rape) PE=4 SV=1	BnaA09g43870D [Brassica napus]	Brassica napus cultivar Tapidor CHASE-containing His kinase 3 (CHK3) gene, complete cds
BnaA09g44460D	--	--	Molecular Function: DNA binding (GO:0003677);; Molecular Function: sequence-specific DNA binding transcription factor activity (GO:0003700);; Cellular Component: nucleus (GO:0005634);; Biological Process: photomorphogenesis (GO:0009640);; Biological Process: response to ethylene (GO:0009723);; Biological Process: response to auxin (GO:0009733);; Biological Process: cytokinin-activated signaling p…	--	--	--	ZF-HD protein dimerisation region	Mini zinc finger protein 3 GN=MIF3 OS=Arabidopsis thaliana (Mouse-ear cress) PE=1 SV=1	BnaA09g44460D protein {ECO:0000313|EMBL:CDY21695.1} OS=Brassica napus (Rape) PE=4 SV=1	PREDICTED: mini zinc finger protein 3 [Brassica rapa]	PREDICTED: Brassica rapa mini zinc finger protein 3 (LOC103842678), mRNA
BnaC08g41210D	--	--	--	--	[R]	General function prediction only	PPR repeat family;; PPR repeat;; PPR repeat;; Pentatricopeptide repeat domain;; Mitochondrial 28S ribosomal protein S27;; Tetratricopeptide repeat	Pentatricopeptide repeat-containing protein At1g12300, mitochondrial (Precursor) GN=At1g12300 OS=Arabidopsis thaliana (Mouse-ear cress) PE=2 SV=1	BnaC08g41210D protein {ECO:0000313|EMBL:CDY16002.1} OS=Brassica napus (Rape) PE=4 SV=1	BnaC08g41210D [Brassica napus]	PREDICTED: Brassica rapa pentatricopeptide repeat-containing protein At1g12620-like (LOC103843127), transcript variant X1, mRNA
BnaC08g42460D	[GEPR]	--	Cellular Component: vacuole (GO:0005773);; Cellular Component: cis-Golgi network (GO:0005801);; Cellular Component: integral component of plasma membrane (GO:0005887);; Molecular Function: sucrose:hydrogen symporter activity (GO:0008506);; Biological Process: sucrose transport (GO:0015770);; Biological Process: carbohydrate transmembrane transport (GO:0034219);;	--	[G]	Carbohydrate transport and metabolism	MFS/sugar transport protein;; PUCC protein	Sucrose transport protein SUC4 GN=F21M12.35 OS=Arabidopsis thaliana (Mouse-ear cress) PE=1 SV=2	BnaC08g42460D protein {ECO:0000313|EMBL:CDY22612.1} OS=Brassica napus (Rape) PE=4 SV=1	BnaC08g42460D [Brassica napus]	PREDICTED: Brassica rapa sucrose transport protein SUC4-like (LOC103843325), transcript variant X2, mRNA
BnaC08g41940D	--	--	--	K14487|9e-33|ath:AT5G51470|auxin-responsive GH3 family protein	--	--	GH3 auxin-responsive promoter	4-substituted benzoates-glutamate ligase GH3.12 OS=Arabidopsis thaliana (Mouse-ear cress) PE=1 SV=1	BnaC08g41940D protein {ECO:0000313|EMBL:CDY34635.1} OS=Brassica napus (Rape) PE=4 SV=1	BnaC08g41940D [Brassica napus]	PREDICTED: Brassica rapa 4-substituted benzoates-glutamate ligase GH3.12-like (LOC103843293), transcript variant X2, mRNA
BnaC08g38010D	--	--	Cellular Component: mitochondrion (GO:0005739);; Biological Process: response to light stimulus (GO:0009416);; Biological Process: unidimensional cell growth (GO:0009826);; Biological Process: brassinosteroid biosynthetic process (GO:0016132);; Molecular Function: oxidoreductase activity (GO:0016491);; Molecular Function: oxygen binding (GO:0019825);; Molecular Function: metal ion binding (GO:004…	--	[QI]	--	--	Cytochrome P450 72C1 GN=At1g17060 OS=Arabidopsis thaliana (Mouse-ear cress) PE=2 SV=2	BnaC08g38010D protein {ECO:0000313|EMBL:CDX81800.1} OS=Brassica napus (Rape) PE=4 SV=1	BnaC08g38010D [Brassica napus]	PREDICTED: Brassica rapa cytochrome P450 72C1-like (LOC103842814), mRNA
BnaC08g41040D	--	--	Biological Process: defense response (GO:0006952);;	--	[S]	Function unknown	Domain of unknown function (DUF947)	Thionin-like protein 1 (Precursor) GN=At1g12660 OS=Arabidopsis thaliana (Mouse-ear cress) PE=3 SV=1	BnaC08g41040D protein {ECO:0000313|EMBL:CDY16019.1} OS=Brassica napus (Rape) PE=4 SV=1	BnaC08g41040D [Brassica napus]	PREDICTED: Brassica rapa thionin-like protein 1 (LOC103843113), mRNA
BnaA09g47690D	[U]	Intracellular trafficking, secretion, and vesicular transport	Molecular Function: SNAP receptor activity (GO:0005484);; Cellular Component: plasma membrane (GO:0005886);; Biological Process: intracellular protein transport (GO:0006886);; Biological Process: membrane fusion (GO:0006944);; Biological Process: pollen tube growth (GO:0009860);; Biological Process: vesicle-mediated transport (GO:0016192);; Cellular Component: transport vesicle (GO:0030133);;	K08486|0.0|ath:AT1G11250|SYP125	[U]	Intracellular trafficking, secretion, and vesicular transport	SNARE domain;; Syntaxin	Syntaxin-125 GN=SYP125 OS=Arabidopsis thaliana (Mouse-ear cress) PE=2 SV=1	BnaA09g47690D protein {ECO:0000313|EMBL:CDY34843.1} OS=Brassica napus (Rape) PE=3 SV=1	BnaA09g47690D [Brassica napus]	PREDICTED: Brassica rapa syntaxin-125-like (LOC103843248), mRNA
BnaA09g41490D	--	--	Molecular Function: voltage-gated potassium channel activity (GO:0005249);; Cellular Component: nucleus (GO:0005634);; Biological Process: potassium ion transport (GO:0006813);; Cellular Component: voltage-gated potassium channel complex (GO:0008076);; Biological Process: protein homooligomerization (GO:0051260);;	--	[R]	General function prediction only	BTB/POZ domain	BTB/POZ domain-containing protein At2g24240 GN=At2g24240 OS=Arabidopsis thaliana (Mouse-ear cress) PE=2 SV=1	BnaA09g41490D protein {ECO:0000313|EMBL:CDY34782.1} OS=Brassica napus (Rape) PE=4 SV=1	PREDICTED: BTB/POZ domain-containing protein At2g24240 [Brassica rapa]	PREDICTED: Brassica rapa BTB/POZ domain-containing protein At2g24240 (LOC103842370), mRNA
BnaA09g43110D	[T]	Signal transduction mechanisms	Biological Process: maltose metabolic process (GO:0000023);; Biological Process: pentose-phosphate shunt (GO:0006098);; Biological Process: rRNA processing (GO:0006364);; Cellular Component: chloroplast thylakoid membrane (GO:0009535);; Cellular Component: chloroplast stroma (GO:0009570);; Biological Process: plastid organization (GO:0009657);; Biological Process: stomatal complex morphogenesis (…	--	--	--	FHA domain	Zeaxanthin epoxidase, chloroplastic (Precursor) GN=ABA2 OS=Nicotiana plumbaginifolia (Leadwort-leaved tobacco) PE=1 SV=1	BnaA09g43110D protein {ECO:0000313|EMBL:CDY13809.1} OS=Brassica napus (Rape) PE=4 SV=1	PREDICTED: uncharacterized protein LOC103842515 [Brassica rapa]	PREDICTED: Brassica rapa uncharacterized LOC103842515 (LOC103842515), mRNA
BnaA09g41700D	--	--	--	--	--	--	--	Probable F-box protein At5g04010 GN=NSFBx OS=Arabidopsis thaliana (Mouse-ear cress) PE=2 SV=1	BnaA09g41700D protein {ECO:0000313|EMBL:CDY34803.1} OS=Brassica napus (Rape) PE=4 SV=1	BnaA09g41700D [Brassica napus]	PREDICTED: Brassica rapa probable F-box protein At5g04010 (LOC103842435), mRNA
BnaA09g51300D	--	--	Biological Process: MAPK cascade (GO:0000165);; Biological Process: response to hypoxia (GO:0001666);; Molecular Function: protein binding (GO:0005515);; Cellular Component: nucleus (GO:0005634);; Biological Process: protein targeting to membrane (GO:0006612);; Biological Process: salicylic acid biosynthetic process (GO:0009697);; Biological Process: systemic acquired resistance, salicylic acid m…	--	--	--	--	Protein NIM1-INTERACTING 1 GN=NIMIN-1 OS=Arabidopsis thaliana (Mouse-ear cress) PE=1 SV=1	BnaA09g51300D protein {ECO:0000313|EMBL:CDY32466.1} OS=Brassica napus (Rape) PE=4 SV=1	BnaA09g51300D [Brassica napus]	PREDICTED: Brassica rapa protein NIM1-INTERACTING 1-like (LOC103843751), mRNA
BnaC08g44510D	[L]	Replication, recombination and repair	Cellular Component: nucleus (GO:0005634);; Cellular Component: plasma membrane (GO:0005886);; Biological Process: chromatin silencing (GO:0006342);; Biological Process: regulation of flower development (GO:0009909);; Biological Process: histone H3-K9 methylation (GO:0051567);;	--	--	--	HRDC domain	ATP-dependent DNA helicase Q-like 4A GN=At1g10930 OS=Arabidopsis thaliana (Mouse-ear cress) PE=2 SV=1	BnaC08g44510D protein {ECO:0000313|EMBL:CDY10000.1} OS=Brassica napus (Rape) PE=4 SV=1	BnaC08g44510D [Brassica napus]	PREDICTED: Brassica rapa uncharacterized LOC103843579 (LOC103843579), mRNA
BnaC08g37340D	--	--	Cellular Component: plasma membrane (GO:0005886);; Biological Process: proteolysis (GO:0006508);; Biological Process: lipid transport (GO:0006869);; Molecular Function: peptidase activity (GO:0008233);; Molecular Function: lipid binding (GO:0008289);; Cellular Component: anchored component of membrane (GO:0031225);;	--	--	--	Probable lipid transfer;; Protease inhibitor/seed storage/LTP family	Non-specific lipid transfer protein GPI-anchored 1 (Precursor) GN=LTPG1 OS=Arabidopsis thaliana (Mouse-ear cress) PE=1 SV=1	BnaC08g37340D protein {ECO:0000313|EMBL:CDX81867.1} OS=Brassica napus (Rape) PE=4 SV=1	BnaC08g37340D [Brassica napus]	PREDICTED: Brassica rapa lipid transfer-like protein VAS (LOC103842707), mRNA
BnaA09g44950D	--	--	Molecular Function: motor activity (GO:0003774);; Molecular Function: actin binding (GO:0003779);; Molecular Function: ATP binding (GO:0005524);; Biological Process: protein import into nucleus (GO:0006606);; Biological Process: sister chromatid cohesion (GO:0007062);; Biological Process: gravitropism (GO:0009630);; Biological Process: embryonic pattern specification (GO:0009880);; Biological Pro…	--	[Z]	Cytoskeleton	Myosin head (motor domain);; DIL domain;; IQ calmodulin-binding motif;; Myosin N-terminal SH3-like domain	Myosin-5 GN=F1L3.28 OS=Arabidopsis thaliana (Mouse-ear cress) PE=1 SV=1	BnaA09g44950D protein {ECO:0000313|EMBL:CDY21744.1} OS=Brassica napus (Rape) PE=4 SV=1	BnaA09g44950D [Brassica napus]	PREDICTED: Brassica rapa myosin-5 (LOC103842746), transcript variant X1, mRNA
BnaC08g39620D	--	--	Cellular Component: mitochondrial respiratory chain complex I (GO:0005747);; Biological Process: ubiquitin-dependent protein catabolic process (GO:0006511);; Molecular Function: NADH dehydrogenase (ubiquinone) activity (GO:0008137);; Biological Process: photorespiration (GO:0009853);; Biological Process: response to misfolded protein (GO:0051788);; Biological Process: proteasome core complex asse…	--	--	--	NADH-ubiquinone oxidoreductase B12 subunit family	NADH dehydrogenase [ubiquinone] 1 beta subcomplex subunit 3-B GN=At1g14450 OS=Arabidopsis thaliana (Mouse-ear cress) PE=3 SV=1	BnaC08g39620D protein {ECO:0000313|EMBL:CDX81639.1} OS=Brassica napus (Rape) PE=4 SV=1	BnaC08g39620D [Brassica napus]	Eutrema salsugineum hypothetical protein (EUTSA_v10009257mg) mRNA, complete cds
BnaA09g45390D	--	--	--	--	--	--	--	--	BnaA09g45390D protein {ECO:0000313|EMBL:CDY33733.1} OS=Brassica napus (Rape) PE=4 SV=1	BnaA09g45390D [Brassica napus]	Brassica rapa subsp. pekinensis clone KBrB033O04, complete sequence
BnaC08g40320D	--	--	Molecular Function: chromatin binding (GO:0003682);; Molecular Function: sequence-specific DNA binding transcription factor activity (GO:0003700);; Cellular Component: nucleus (GO:0005634);; Biological Process: regulation of transcription, DNA-templated (GO:0006355);; Biological Process: membrane fusion (GO:0006944);; Molecular Function: identical protein binding (GO:0042802);; Molecular Function…	--	[K]	Transcription	Myb/SANT-like DNA-binding domain;; Myb/SANT-like DNA-binding domain	Trihelix transcription factor GT-1 GN=GT-1 OS=Arabidopsis thaliana (Mouse-ear cress) PE=1 SV=1	BnaC08g40320D protein {ECO:0000313|EMBL:CDY16091.1} OS=Brassica napus (Rape) PE=4 SV=1	BnaC08g40320D [Brassica napus]	PREDICTED: Brassica rapa trihelix transcription factor GT-1-like (LOC103843049), transcript variant X4, mRNA
BnaA09g47180D	[U]	Intracellular trafficking, secretion, and vesicular transport	Biological Process: cytokinesis (GO:0000910);; Molecular Function: protein binding (GO:0005515);; Cellular Component: vacuole (GO:0005773);; Cellular Component: cytosol (GO:0005829);; Cellular Component: plasma membrane (GO:0005886);; Biological Process: protein targeting to vacuole (GO:0006623);; Biological Process: vesicle docking involved in exocytosis (GO:0006904);; Biological Process: membra…	--	[U]	Intracellular trafficking, secretion, and vesicular transport	Sec1 family	SNARE-interacting protein KEULE GN=KEU OS=Arabidopsis thaliana (Mouse-ear cress) PE=1 SV=2	BnaA09g47180D protein {ECO:0000313|EMBL:CDY26559.1} OS=Brassica napus (Rape) PE=4 SV=1	PREDICTED: SNARE-interacting protein KEULE [Brassica rapa]	PREDICTED: Brassica rapa SNARE-interacting protein KEULE (LOC103843134), mRNA
BnaC08g44240D	--	--	--	--	--	--	--	--	BnaC08g44240D protein {ECO:0000313|EMBL:CDY10027.1} OS=Brassica napus (Rape) PE=4 SV=1	BnaC08g44240D [Brassica napus]	Brassica rapa subsp. pekinensis clone KBrS003D10, complete sequence
BnaA09g47150D	--	--	Molecular Function: protein binding (GO:0005515);; Cellular Component: chloroplast (GO:0009507);; Cellular Component: membrane (GO:0016020);; Biological Process: intracellular signal transduction (GO:0035556);;	--	[OUT]	--	Cornichon protein	Protein cornichon homolog 4 GN=At1g12390 OS=Arabidopsis thaliana (Mouse-ear cress) PE=1 SV=1	BnaA09g47150D protein {ECO:0000313|EMBL:CDY26562.1} OS=Brassica napus (Rape) PE=4 SV=1	BnaA09g47150D [Brassica napus]	PREDICTED: Brassica rapa protein cornichon homolog 4-like (LOC103843131), mRNA
BnaA09g42720D	--	--	Molecular Function: ubiquitin thiolesterase activity (GO:0004221);; Molecular Function: ubiquitin-specific protease activity (GO:0004843);; Cellular Component: nucleus (GO:0005634);; Cellular Component: cytoplasm (GO:0005737);; Biological Process: glucose catabolic process (GO:0006007);; Biological Process: N-terminal protein myristoylation (GO:0006499);; Biological Process: ubiquitin-dependent p…	K11842|0.0|ath:AT2G22310|ATUBP4	[O]	Posttranslational modification, protein turnover, chaperones	Ubiquitin carboxyl-terminal hydrolase;; Ubiquitin carboxyl-terminal hydrolase	Ubiquitin carboxyl-terminal hydrolase 4 GN=UBP4 OS=Arabidopsis thaliana (Mouse-ear cress) PE=1 SV=2	Ubiquitin carboxyl-terminal hydrolase {ECO:0000256|RuleBase:RU004435} OS=Brassica napus (Rape) PE=3 SV=1	BnaA09g42720D [Brassica napus]	PREDICTED: Brassica rapa ubiquitin carboxyl-terminal hydrolase 3 (LOC103837901), mRNA
BnaA09g43120D	--	--	Cellular Component: mitochondrion (GO:0005739);; Cellular Component: Golgi apparatus (GO:0005794);; Cellular Component: plasma membrane (GO:0005886);; Biological Process: transport (GO:0006810);; Molecular Function: phosphatidylinositol transporter activity (GO:0008526);;	--	[I]	Lipid transport and metabolism	CRAL/TRIO domain;; CRAL/TRIO, N-terminal domain;; Divergent CRAL/TRIO domain	Phosphatidylinositol/phosphatidylcholine transfer protein SFH8 GN=SFH8 OS=Arabidopsis thaliana (Mouse-ear cress) PE=2 SV=1	BnaA09g43120D protein {ECO:0000313|EMBL:CDY13810.1} OS=Brassica napus (Rape) PE=4 SV=1	BnaA09g43120D [Brassica napus]	PREDICTED: Brassica rapa phosphatidylinositol/phosphatidylcholine transfer protein SFH8 (LOC103842517), transcript variant X2, mRNA
BnaC08g38890D	--	--	Cellular Component: nucleus (GO:0005634);; Cellular Component: plasma membrane (GO:0005886);; Biological Process: organ senescence (GO:0010260);; Biological Process: stomatal complex patterning (GO:0010375);;	--	--	--	--	Uncharacterized protein At1g15400 GN=At1g15400 OS=Arabidopsis thaliana (Mouse-ear cress) PE=1 SV=2	BnaC08g38890D protein {ECO:0000313|EMBL:CDX81712.1} OS=Brassica napus (Rape) PE=4 SV=1	BnaC08g38890D [Brassica napus]	PREDICTED: Brassica rapa uncharacterized protein At1g15400-like (LOC103842905), mRNA
BnaC08g40380D	--	--	--	--	--	--	--	--	BnaC08g40380D protein {ECO:0000313|EMBL:CDY16085.1} OS=Brassica napus (Rape) PE=4 SV=1	BnaC08g40380D [Brassica napus]	PREDICTED: Brassica rapa putative nuclease HARBI1 (LOC103829799), mRNA
BnaA09g51180D	[J]	Translation, ribosomal structure and biogenesis	Biological Process: RNA methylation (GO:0001510);; Molecular Function: structural constituent of ribosome (GO:0003735);; Cellular Component: nucleolus (GO:0005730);; Cellular Component: plasma membrane (GO:0005886);; Biological Process: gluconeogenesis (GO:0006094);; Biological Process: glycolysis (GO:0006096);; Biological Process: translation (GO:0006412);; Cellular Component: plasmodesma (GO:00…	K02885|1e-142|ath:AT1G02780|emb2386 (embryo defective 2386)	[J]	Translation, ribosomal structure and biogenesis	Ribosomal protein L19e	60S ribosomal protein L19-1 GN=F22D16.23 OS=Arabidopsis thaliana (Mouse-ear cress) PE=2 SV=1	Ribosomal protein L19 {ECO:0000256|RuleBase:RU000574} OS=Brassica napus (Rape) PE=3 SV=1	BnaA09g51180D [Brassica napus]	PREDICTED: Brassica rapa 60S ribosomal protein L19-1-like (LOC103843738), misc_RNA
BnaA09g45730D	--	--	Biological Process: cytokinesis by cell plate formation (GO:0000911);; Cellular Component: extracellular region (GO:0005576);; Cellular Component: nucleus (GO:0005634);; Biological Process: regulation of cell proliferation (GO:0042127);; Biological Process: petal formation (GO:0048451);; Biological Process: sepal formation (GO:0048453);;	--	[R]	General function prediction only	Zinc finger, C3HC4 type (RING finger)	--	BnaA09g45730D protein {ECO:0000313|EMBL:CDY33767.1} OS=Brassica napus (Rape) PE=4 SV=1	BnaA09g45730D [Brassica napus]	PREDICTED: Brassica rapa uncharacterized LOC103843189 (LOC103843189), mRNA
BnaC08g41340D	--	--	Cellular Component: nucleus (GO:0005634);; Biological Process: N-terminal protein myristoylation (GO:0006499);; Biological Process: defense response (GO:0006952);; Molecular Function: ADP binding (GO:0043531);;	--	[T]	Signal transduction mechanisms	NB-ARC domain	Probable disease resistance protein At1g12290 GN=At1g12290 OS=Arabidopsis thaliana (Mouse-ear cress) PE=2 SV=1	BnaC08g41340D protein {ECO:0000313|EMBL:CDY15989.1} OS=Brassica napus (Rape) PE=4 SV=1	BnaC08g41340D [Brassica napus]	PREDICTED: Brassica rapa probable disease resistance protein At1g12290 (LOC103843140), transcript variant X1, mRNA >gi|685368357|ref|XM_009119850.1| PREDICTED: Brassica rapa probable disease resistance protein At1g12290 (LOC103843140), transcript variant X2, mRNA
BnaC08g38030D	[H]	Coenzyme transport and metabolism	Biological Process: response to hypoxia (GO:0001666);; Cellular Component: nucleus (GO:0005634);; Cellular Component: mitochondrion (GO:0005739);; Cellular Component: endoplasmic reticulum (GO:0005783);; Cellular Component: cytosol (GO:0005829);; Cellular Component: plasma membrane (GO:0005886);; Biological Process: ubiquinone biosynthetic process (GO:0006744);; Cellular Component: chloroplast st…	K05356|2e-17|ath:AT1G17050|SPS2	[H]	Coenzyme transport and metabolism	--	Solanesyl diphosphate synthase 2, chloroplastic (Precursor) GN=F20D23.25 OS=Arabidopsis thaliana (Mouse-ear cress) PE=1 SV=1	BnaC08g38030D protein {ECO:0000313|EMBL:CDX81798.1} OS=Brassica napus (Rape) PE=4 SV=1	BnaC08g38030D [Brassica napus]	Eutrema salsugineum hypothetical protein (EUTSA_v10007715mg) mRNA, complete cds
BnaA09g42460D	--	--	Cellular Component: plasma membrane (GO:0005886);;	--	--	--	--	--	BnaA09g42460D protein {ECO:0000313|EMBL:CDY13744.1} OS=Brassica napus (Rape) PE=4 SV=1	BnaA09g42460D [Brassica napus]	PREDICTED: Brassica rapa early endosome antigen 1 (LOC103837877), mRNA
BnaA09g41620D	[S]	Function unknown	Molecular Function: protein serine/threonine kinase activity (GO:0004674);; Molecular Function: ATP binding (GO:0005524);; Cellular Component: plasma membrane (GO:0005886);; Biological Process: protein phosphorylation (GO:0006468);; Biological Process: transmembrane receptor protein tyrosine kinase signaling pathway (GO:0007169);; Cellular Component: integral component of membrane (GO:0016021);;	--	--	--	Leucine Rich repeats (2 copies);; Protein kinase domain;; Leucine rich repeat;; Protein tyrosine kinase;; Leucine Rich Repeat;; Leucine Rich repeat;; Leucine rich repeat N-terminal domain	Putative leucine-rich repeat receptor-like serine/threonine-protein kinase At2g24130 (Precursor) GN=At2g24130 OS=Arabidopsis thaliana (Mouse-ear cress) PE=3 SV=1	BnaA09g41620D protein {ECO:0000313|EMBL:CDY34795.1} OS=Brassica napus (Rape) PE=4 SV=1	BnaA09g41620D [Brassica napus]	PREDICTED: Brassica rapa putative leucine-rich repeat receptor-like serine/threonine-protein kinase At2g24130 (LOC103842380), mRNA
BnaA09g49680D	--	--	Cellular Component: intracellular membrane-bounded organelle (GO:0043231);;	--	[O]	Posttranslational modification, protein turnover, chaperones	CS domain	Uncharacterized protein At3g03773 GN=At3g03773 OS=Arabidopsis thaliana (Mouse-ear cress) PE=1 SV=1	BnaC07g45830D protein {ECO:0000313|EMBL:CDX72561.1} OS=Brassica napus (Rape) PE=4 SV=1	BnaA07g24090D [Brassica napus]	PREDICTED: Brassica rapa uncharacterized protein At3g03773 (LOC103828218), mRNA
BnaA09g45290D	--	--	Cellular Component: extracellular region (GO:0005576);; Cellular Component: cell wall (GO:0005618);; Cellular Component: endosome (GO:0005768);; Cellular Component: Golgi apparatus (GO:0005794);; Cellular Component: trans-Golgi network (GO:0005802);; Molecular Function: zinc ion binding (GO:0008270);; Molecular Function: thiol oxidase activity (GO:0016972);; Biological Process: response to cation…	--	[D]	Cell cycle control, cell division, chromosome partitioning	Erv1 / Alr family;; Thioredoxin	Sulfhydryl oxidase 1 (Precursor) GN=T15D22.7 OS=Arabidopsis thaliana (Mouse-ear cress) PE=2 SV=1	Sulfhydryl oxidase {ECO:0000256|RuleBase:RU371123} OS=Brassica napus (Rape) PE=4 SV=1	BnaA09g45290D [Brassica napus]	PREDICTED: Brassica rapa sulfhydryl oxidase 1 (LOC103842925), mRNA
BnaC08g43750D	--	--	--	--	--	--	Plant phosphoribosyltransferase C-terminal;; C2 domain	C2 and GRAM domain-containing protein At1g03370 GN=At1g03370 OS=Arabidopsis thaliana (Mouse-ear cress) PE=2 SV=4	BnaC08g43750D protein {ECO:0000313|EMBL:CDY10076.1} OS=Brassica napus (Rape) PE=4 SV=1	BnaC08g43750D [Brassica napus]	PREDICTED: Brassica rapa multiple C2 and transmembrane domain-containing protein 1 (LOC103843669), mRNA
BnaA09g41540D	[Q]	Secondary metabolites biosynthesis, transport and catabolism	Molecular Function: monooxygenase activity (GO:0004497);; Molecular Function: iron ion binding (GO:0005506);; Cellular Component: extracellular region (GO:0005576);; Molecular Function: electron carrier activity (GO:0009055);; Molecular Function: oxidoreductase activity, acting on paired donors, with incorporation or reduction of molecular oxygen (GO:0016705);; Molecular Function: oxygen binding …	--	[Q]	Secondary metabolites biosynthesis, transport and catabolism	Cytochrome P450	Cytochrome P450 705A5 GN=MDN11.4 OS=Arabidopsis thaliana (Mouse-ear cress) PE=2 SV=1	BnaA09g41540D protein {ECO:0000313|EMBL:CDY34787.1} OS=Brassica napus (Rape) PE=3 SV=1	BnaA09g41540D [Brassica napus]	Eutrema salsugineum hypothetical protein (EUTSA_v10024952mg) mRNA, complete cds
BnaC08g42560D	--	--	--	--	--	--	--	--	BnaC08g42560D protein {ECO:0000313|EMBL:CDY22622.1} OS=Brassica napus (Rape) PE=4 SV=1	BnaC08g42560D [Brassica napus]	PREDICTED: Brassica rapa U2 small nuclear ribonucleoprotein A' (LOC103843334), transcript variant X2, mRNA
BnaC08g41360D	--	--	Molecular Function: DNA binding (GO:0003677);; Molecular Function: sequence-specific DNA binding transcription factor activity (GO:0003700);; Cellular Component: nucleus (GO:0005634);; Biological Process: regulation of transcription, DNA-templated (GO:0006355);; Biological Process: embryo development ending in seed dormancy (GO:0009793);; Biological Process: cell wall biogenesis (GO:0042546);; Bi…	--	--	--	No apical meristem (NAM) protein	NAC domain-containing protein 7 GN=T28K15.1 OS=Arabidopsis thaliana (Mouse-ear cress) PE=2 SV=2	BnaC08g41360D protein {ECO:0000313|EMBL:CDY15987.1} OS=Brassica napus (Rape) PE=4 SV=1	BnaC08g41360D [Brassica napus]	PREDICTED: Camelina sativa NAC domain-containing protein 7-like (LOC104755492), transcript variant X3, mRNA
BnaC08g37560D	[UT]	--	Cellular Component: mitochondrion (GO:0005739);; Cellular Component: endoplasmic reticulum (GO:0005783);; Biological Process: vesicle-mediated transport (GO:0016192);;	--	[U]	Intracellular trafficking, secretion, and vesicular transport	PRA1 family protein	PRA1 family protein F1 GN=PRA1F1 OS=Arabidopsis thaliana (Mouse-ear cress) PE=1 SV=1	BnaC08g37560D protein {ECO:0000313|EMBL:CDX81845.1} OS=Brassica napus (Rape) PE=4 SV=1	BnaC08g37560D [Brassica napus]	PREDICTED: Brassica rapa PRA1 family protein F1-like (LOC103842737), mRNA
BnaA09g45630D	[A]	RNA processing and modification	Molecular Function: ubiquitin-protein ligase activity (GO:0004842);; Cellular Component: plasma membrane (GO:0005886);; Molecular Function: zinc ion binding (GO:0008270);; Biological Process: protein ubiquitination (GO:0016567);;	--	[A]	RNA processing and modification	Protein of unknown function (DUF3675);; RING-variant domain	Probable E3 ubiquitin ligase SUD1 GN=F28A23.140 OS=Arabidopsis thaliana (Mouse-ear cress) PE=1 SV=1	BnaA09g45630D protein {ECO:0000313|EMBL:CDY33757.1} OS=Brassica napus (Rape) PE=4 SV=1	BnaA09g45630D [Brassica napus]	PREDICTED: Brassica rapa uncharacterized LOC103842978 (LOC103842978), mRNA
BnaA09g45380D	--	--	Cellular Component: cytoplasm (GO:0005737);; Cellular Component: plasma membrane (GO:0005886);; Biological Process: response to oxidative stress (GO:0006979);;	--	--	--	PLAC8 family	Protein PLANT CADMIUM RESISTANCE 2 GN=PCR2 OS=Arabidopsis thaliana (Mouse-ear cress) PE=1 SV=1	BnaA09g45380D protein {ECO:0000313|EMBL:CDY33732.1} OS=Brassica napus (Rape) PE=4 SV=1	BnaA09g45380D [Brassica napus]	PREDICTED: Brassica rapa protein PLANT CADMIUM RESISTANCE 2 (LOC103842935), mRNA
BnaA09g47870D	--	--	Cellular Component: extracellular region (GO:0005576);; Cellular Component: endosome (GO:0005768);; Cellular Component: Golgi medial cisterna (GO:0005797);; Cellular Component: cis-Golgi network (GO:0005801);; Cellular Component: trans-Golgi network (GO:0005802);; Cellular Component: integral component of membrane (GO:0016021);;	--	[U]	Intracellular trafficking, secretion, and vesicular transport	Endomembrane protein 70	Transmembrane 9 superfamily member 1 {ECO:0000305} (Precursor) OS=Arabidopsis thaliana (Mouse-ear cress) PE=1 SV=1	BnaA09g47870D protein {ECO:0000313|EMBL:CDY34861.1} OS=Brassica napus (Rape) PE=4 SV=1	BnaA09g47870D [Brassica napus]	Eutrema salsugineum hypothetical protein (EUTSA_v10007167mg) mRNA, complete cds
BnaC08g38480D	[O]	Posttranslational modification, protein turnover, chaperones	Molecular Function: damaged DNA binding (GO:0003684);; Cellular Component: nucleus (GO:0005634);; Biological Process: base-excision repair (GO:0006284);; Biological Process: nucleotide-excision repair (GO:0006289);; Biological Process: meiosis (GO:0007126);; Biological Process: regulation of chromosome organization (GO:0033044);; Molecular Function: ubiquitin binding (GO:0043130);; Biological Pro…	K10839|0.0|ath:AT1G16190|DNA repair protein RAD23, putative	[L]	Replication, recombination and repair	UBA/TS-N domain;; XPC-binding domain;; Ubiquitin family;; CUE domain	Probable ubiquitin receptor RAD23a GN=F3O9.1 OS=Arabidopsis thaliana (Mouse-ear cress) PE=1 SV=2	BnaC08g38480D protein {ECO:0000313|EMBL:CDX81753.1} OS=Brassica napus (Rape) PE=4 SV=1	BnaC08g38480D [Brassica napus]	PREDICTED: Brassica rapa probable ubiquitin receptor RAD23a (LOC103842858), mRNA
BnaA09g44870D	[V]	Defense mechanisms	Cellular Component: plasma membrane (GO:0005886);; Biological Process: drug transmembrane transport (GO:0006855);; Molecular Function: drug transmembrane transporter activity (GO:0015238);; Molecular Function: antiporter activity (GO:0015297);; Biological Process: cadmium ion transport (GO:0015691);; Biological Process: transcription factor import into nucleus (GO:0042991);; Biological Process: s…	--	[R]	General function prediction only	MatE	MATE efflux family protein 5 GN=F3L12.12 OS=Arabidopsis thaliana (Mouse-ear cress) PE=3 SV=1	MATE efflux family protein {ECO:0000256|RuleBase:RU004914} OS=Brassica napus (Rape) PE=3 SV=1	BnaA09g44870D [Brassica napus]	PREDICTED: Brassica rapa MATE efflux family protein 5 (LOC103842738), mRNA
BnaC08g41030D	--	--	Biological Process: defense response (GO:0006952);;	--	--	--	--	Thionin-like protein 1 (Precursor) GN=At1g12660 OS=Arabidopsis thaliana (Mouse-ear cress) PE=3 SV=1	BnaC08g41030D protein {ECO:0000313|EMBL:CDY16020.1} OS=Brassica napus (Rape) PE=4 SV=1	BnaC08g41030D [Brassica napus]	PREDICTED: Brassica rapa thionin-like protein 1 (LOC103843113), mRNA
BnaA09g49320D	[RTKL]	--	Molecular Function: protein serine/threonine kinase activity (GO:0004674);; Molecular Function: protein tyrosine kinase activity (GO:0004713);; Molecular Function: ATP binding (GO:0005524);; Cellular Component: plasma membrane (GO:0005886);; Biological Process: protein phosphorylation (GO:0006468);; Cellular Component: chloroplast (GO:0009507);;	--	[T]	Signal transduction mechanisms	Protein tyrosine kinase;; Protein kinase domain	Protein kinase APK1A, chloroplastic (Precursor) GN=APK1A OS=Arabidopsis thaliana (Mouse-ear cress) PE=2 SV=1	BnaA09g49320D protein {ECO:0000313|EMBL:CDY06271.1} OS=Brassica napus (Rape) PE=3 SV=1	PREDICTED: protein kinase APK1A, chloroplastic [Brassica rapa]	PREDICTED: Brassica rapa protein kinase APK1A, chloroplastic (LOC103843444), mRNA
BnaA09g42890D	--	--	Cellular Component: ubiquitin ligase complex (GO:0000151);; Cellular Component: cytoplasm (GO:0005737);; Biological Process: ubiquitin-dependent protein catabolic process (GO:0006511);; Molecular Function: zinc ion binding (GO:0008270);; Biological Process: protein ubiquitination (GO:0016567);; Molecular Function: ubiquitin-ubiquitin ligase activity (GO:0034450);; Biological Process: cellular pro…	K12169|0.0|ath:AT2G22010|RKP	[A]	RNA processing and modification	SPRY domain;; Zinc finger, C3HC4 type (RING finger)	E3 ubiquitin-protein ligase RKP GN=F7D8.33 OS=Arabidopsis thaliana (Mouse-ear cress) PE=2 SV=2	BnaA09g42890D protein {ECO:0000313|EMBL:CDY13787.1} OS=Brassica napus (Rape) PE=4 SV=1	BnaA09g42890D [Brassica napus]	PREDICTED: Brassica rapa E3 ubiquitin-protein ligase RKP (LOC103842484), mRNA
BnaA09g47300D	[S]	Function unknown	Molecular Function: protein binding (GO:0005515);; Cellular Component: nucleus (GO:0005634);; Cellular Component: plasma membrane (GO:0005886);; Biological Process: N-terminal protein myristoylation (GO:0006499);; Biological Process: plant-type hypersensitive response (GO:0009626);; Biological Process: defense response to bacterium, incompatible interaction (GO:0009816);; Molecular Function: sign…	--	[T]	Signal transduction mechanisms	NB-ARC domain;; Leucine rich repeat;; Leucine Rich repeats (2 copies);; Leucine Rich Repeat	Probable disease resistance protein At1g12290 GN=At1g12290 OS=Arabidopsis thaliana (Mouse-ear cress) PE=2 SV=1	BnaA09g47300D protein {ECO:0000313|EMBL:CDY26547.1} OS=Brassica napus (Rape) PE=4 SV=1	BnaA09g47300D [Brassica napus]	PREDICTED: Brassica rapa probable disease resistance protein At1g12290 (LOC103843147), mRNA
BnaA09g43760D	--	--	Biological Process: plant-type cell wall modification (GO:0009827);; Molecular Function: kinase activity (GO:0016301);;	--	[R]	General function prediction only	--	--	BnaA09g43760D protein {ECO:0000313|EMBL:CDY13874.1} OS=Brassica napus (Rape) PE=4 SV=1	BnaA09g43760D [Brassica napus]	PREDICTED: Brassica rapa serine/threonine-protein kinase tricorner-like (LOC103842600), transcript variant X3, mRNA
BnaA09g48110D	--	--	Cellular Component: cytoplasm (GO:0005737);; Biological Process: response to auxin (GO:0009733);;	K14487|0.0|ath:AT5G51470|auxin-responsive GH3 family protein	--	--	GH3 auxin-responsive promoter	4-substituted benzoates-glutamate ligase GH3.12 OS=Arabidopsis thaliana (Mouse-ear cress) PE=1 SV=1	BnaA09g48110D protein {ECO:0000313|EMBL:CDY34885.1} OS=Brassica napus (Rape) PE=4 SV=1	BnaA09g48110D [Brassica napus]	PREDICTED: Brassica rapa 4-substituted benzoates-glutamate ligase GH3.12-like (LOC103843294), mRNA
BnaC08g40390D	--	--	--	--	--	--	Nup53/35/40-type RNA recognition motif;; RNA recognition motif. (a.k.a. RRM, RBD, or RNP domain)	Nucleolin 1 GN=F27K7.6 OS=Arabidopsis thaliana (Mouse-ear cress) PE=1 SV=1	BnaC08g40390D protein {ECO:0000313|EMBL:CDY16084.1} OS=Brassica napus (Rape) PE=4 SV=1	BnaC08g40390D [Brassica napus]	PREDICTED: Brassica rapa uncharacterized LOC103843055 (LOC103843055), transcript variant X3, mRNA
BnaC08g38830D	--	--	Biological Process: defense response (GO:0006952);; Biological Process: signal transduction (GO:0007165);; Biological Process: response to hormone (GO:0009725);; Biological Process: single-organism transport (GO:0044765);; Biological Process: response to oxygen-containing compound (GO:1901700);;	--	[Q]	Secondary metabolites biosynthesis, transport and catabolism	ABC-2 type transporter	ABC transporter G family member 40 GN=T16N11.3 OS=Arabidopsis thaliana (Mouse-ear cress) PE=1 SV=1	BnaC08g38830D protein {ECO:0000313|EMBL:CDX81718.1} OS=Brassica napus (Rape) PE=4 SV=1	BnaC08g38830D [Brassica napus]	PREDICTED: Brassica rapa ABC transporter G family member 40-like (LOC103842897), mRNA
BnaC08g39840D	[E]	Amino acid transport and metabolism	Cellular Component: nucleus (GO:0005634);; Biological Process: alcohol metabolic process (GO:0006066);; Molecular Function: choline dehydrogenase activity (GO:0008812);; Cellular Component: chloroplast (GO:0009507);; Molecular Function: aldehyde-lyase activity (GO:0016832);; Molecular Function: flavin adenine dinucleotide binding (GO:0050660);; Biological Process: oxidation-reduction process (GO:…	--	[R]	General function prediction only	GMC oxidoreductase;; GMC oxidoreductase	Protein HOTHEAD (Precursor) GN=F3N23.17 OS=Arabidopsis thaliana (Mouse-ear cress) PE=1 SV=1	BnaC08g39840D protein {ECO:0000313|EMBL:CDX81617.1} OS=Brassica napus (Rape) PE=3 SV=1	BnaC08g39840D [Brassica napus]	PREDICTED: Brassica rapa protein HOTHEAD-like (LOC103842989), mRNA
BnaC08g42100D	[RTKL]	--	Molecular Function: protein serine/threonine kinase activity (GO:0004674);; Molecular Function: protein tyrosine kinase activity (GO:0004713);; Molecular Function: ATP binding (GO:0005524);; Cellular Component: plasma membrane (GO:0005886);; Biological Process: protein phosphorylation (GO:0006468);; Molecular Function: carbohydrate binding (GO:0030246);; Biological Process: recognition of pollen …	--	--	--	Protein kinase domain;; Protein tyrosine kinase;; PAN-like domain;; D-mannose binding lectin;; S-locus glycoprotein family;; Domain of unknown function (DUF3403);; Phosphotransferase enzyme family	G-type lectin S-receptor-like serine/threonine-protein kinase At1g11330 (Precursor) GN=At1g11330 OS=Arabidopsis thaliana (Mouse-ear cress) PE=2 SV=3	BnaC08g42100D protein {ECO:0000313|EMBL:CDY34651.1} OS=Brassica napus (Rape) PE=4 SV=1	BnaC08g42100D [Brassica napus]	PREDICTED: Brassica rapa uncharacterized LOC103843509 (LOC103843509), mRNA
BnaA09g42470D	[L]	Replication, recombination and repair	Cellular Component: plasma membrane (GO:0005886);;	--	--	--	KIP1-like protein	Chaperone protein ClpB3, mitochondrial (Precursor) OS=Oryza sativa subsp. japonica (Rice) PE=2 SV=3	BnaA09g42470D protein {ECO:0000313|EMBL:CDY13745.1} OS=Brassica napus (Rape) PE=4 SV=1	BnaA09g42470D [Brassica napus]	PREDICTED: Brassica rapa early endosome antigen 1 (LOC103837877), mRNA
BnaA09g45600D	--	--	Cellular Component: nucleus (GO:0005634);; Biological Process: response to symbiotic fungus (GO:0009610);; Biological Process: cellular response to phosphate starvation (GO:0016036);; Biological Process: galactolipid biosynthetic process (GO:0019375);; Biological Process: cellular response to water deprivation (GO:0042631);;	--	[R]	General function prediction only	Kelch motif	F-box/kelch-repeat protein SKIP11 GN=SKIP11 OS=Arabidopsis thaliana (Mouse-ear cress) PE=1 SV=2	BnaA09g45600D protein {ECO:0000313|EMBL:CDY33754.1} OS=Brassica napus (Rape) PE=4 SV=1	BnaA09g45600D [Brassica napus]	PREDICTED: Brassica rapa F-box/kelch-repeat protein SKIP11-like (LOC103842976), transcript variant X1, mRNA
BnaC08g34980D	--	--	Molecular Function: cytochrome-c oxidase activity (GO:0004129);; Cellular Component: mitochondrial respiratory chain (GO:0005746);; Cellular Component: vacuolar membrane (GO:0005774);; Biological Process: protein targeting to vacuole (GO:0006623);; Molecular Function: electron carrier activity (GO:0009055);;	--	--	--	Cytochrome c oxidase subunit VIIa	--	BnaC08g34980D protein {ECO:0000313|EMBL:CDX76912.1} OS=Brassica napus (Rape) PE=4 SV=1	BnaC08g34980D [Brassica napus]	PREDICTED: Brassica rapa uncharacterized LOC103834206 (LOC103834206), mRNA
BnaC08g44500D	[L]	Replication, recombination and repair	Cellular Component: nucleus (GO:0005634);; Cellular Component: plasma membrane (GO:0005886);; Biological Process: chromatin silencing (GO:0006342);; Biological Process: regulation of flower development (GO:0009909);; Biological Process: histone H3-K9 methylation (GO:0051567);;	--	--	--	HRDC domain;; double strand RNA binding domain from DEAD END PROTEIN 1	ATP-dependent DNA helicase Q-like 4A GN=At1g10930 OS=Arabidopsis thaliana (Mouse-ear cress) PE=2 SV=1	BnaC08g44500D protein {ECO:0000313|EMBL:CDY10001.1} OS=Brassica napus (Rape) PE=4 SV=1	BnaC08g44500D [Brassica napus]	PREDICTED: Brassica rapa ATP-dependent DNA helicase Q-like 4A (LOC103843580), mRNA
BnaC08g39130D	[O]	Posttranslational modification, protein turnover, chaperones	Molecular Function: copper ion binding (GO:0005507);; Molecular Function: calmodulin binding (GO:0005516);; Molecular Function: ATP binding (GO:0005524);; Cellular Component: mitochondrion (GO:0005739);; Cellular Component: cytosol (GO:0005829);; Biological Process: gluconeogenesis (GO:0006094);; Biological Process: glycolysis (GO:0006096);; Biological Process: protein folding (GO:0006457);; Biol…	K04078|1e-63|ath:AT1G14980|CPN10	[O]	Posttranslational modification, protein turnover, chaperones	Chaperonin 10 Kd subunit	10 kDa chaperonin GN=CPN10 OS=Arabidopsis thaliana (Mouse-ear cress) PE=3 SV=1	BnaC08g39130D protein {ECO:0000313|EMBL:CDX81688.1} OS=Brassica napus (Rape) PE=3 SV=1	BnaC08g39130D [Brassica napus]	PREDICTED: Brassica rapa 10 kDa chaperonin-like (LOC103842928), mRNA
BnaA09g42270D	--	--	Cellular Component: endosome (GO:0005768);; Cellular Component: Golgi apparatus (GO:0005794);; Cellular Component: trans-Golgi network (GO:0005802);; Cellular Component: integral component of membrane (GO:0016021);; Molecular Function: transferase activity, transferring hexosyl groups (GO:0016758);;	--	[GM]	--	galactosyl transferase GMA12/MNN10 family	Putative glycosyltransferase 7 GN=T20K9.110 OS=Arabidopsis thaliana (Mouse-ear cress) PE=2 SV=1	BnaA09g42270D protein {ECO:0000313|EMBL:CDY49440.1} OS=Brassica napus (Rape) PE=4 SV=1	BnaA09g42270D [Brassica napus]	PREDICTED: Brassica rapa putative glycosyltransferase 7 (LOC103842450), mRNA
BnaC08g39600D	--	--	--	--	--	--	--	--	BnaC08g39600D protein {ECO:0000313|EMBL:CDX81641.1} OS=Brassica napus (Rape) PE=4 SV=1	BnaC08g39600D [Brassica napus]	Eutrema salsugineum hypothetical protein (EUTSA_v10009226mg) mRNA, complete cds
BnaC08g35410D	--	--	--	--	--	--	--	--	BnaC08g35410D protein {ECO:0000313|EMBL:CDX76955.1} OS=Brassica napus (Rape) PE=4 SV=1	BnaC08g35410D [Brassica napus]	--
BnaA09g45190D	[Q]	Secondary metabolites biosynthesis, transport and catabolism	Molecular Function: monooxygenase activity (GO:0004497);; Molecular Function: iron ion binding (GO:0005506);; Cellular Component: mitochondrion (GO:0005739);; Molecular Function: electron carrier activity (GO:0009055);; Biological Process: response to light stimulus (GO:0009416);; Biological Process: unidimensional cell growth (GO:0009826);; Biological Process: brassinosteroid biosynthetic proces…	--	[QI]	--	Cytochrome P450	Cytochrome P450 72C1 GN=At1g17060 OS=Arabidopsis thaliana (Mouse-ear cress) PE=2 SV=2	BnaA09g45190D protein {ECO:0000313|EMBL:CDY21768.1} OS=Brassica napus (Rape) PE=3 SV=1	BnaA09g45190D [Brassica napus]	PREDICTED: Brassica rapa cytochrome P450 72C1-like (LOC103842814), mRNA
BnaC08g43580D	--	--	--	--	--	--	S locus-related glycoprotein 1 binding pollen coat protein (SLR1-BP)	Putative defensin-like protein 137 (Precursor) GN=LCR14 OS=Arabidopsis thaliana (Mouse-ear cress) PE=3 SV=1	BnaC08g43580D protein {ECO:0000313|EMBL:CDY10093.1} OS=Brassica napus (Rape) PE=4 SV=1	BnaC08g43580D [Brassica napus]	Brassica rapa subsp. pekinensis clone KBrB089B13, complete sequence
BnaC08g42330D	--	--	Cellular Component: nucleus (GO:0005634);;	--	--	--	Protein of unknown function (DUF3755)	--	BnaC08g42330D protein {ECO:0000313|EMBL:CDY34674.1} OS=Brassica napus (Rape) PE=4 SV=1	BnaC08g42330D [Brassica napus]	PREDICTED: Brassica rapa uncharacterized LOC103843265 (LOC103843265), transcript variant X3, misc_RNA
BnaC08g39200D	--	--	Cellular Component: cytoplasm (GO:0005737);; Cellular Component: plasma membrane (GO:0005886);; Biological Process: response to oxidative stress (GO:0006979);;	--	--	--	PLAC8 family	Protein PLANT CADMIUM RESISTANCE 2 GN=PCR2 OS=Arabidopsis thaliana (Mouse-ear cress) PE=1 SV=1	BnaC08g39200D protein {ECO:0000313|EMBL:CDX81681.1} OS=Brassica napus (Rape) PE=4 SV=1	BnaC08g39200D [Brassica napus]	PREDICTED: Brassica rapa protein PLANT CADMIUM RESISTANCE 2-like (LOC103842933), mRNA
BnaA09g45500D	[J]	Translation, ribosomal structure and biogenesis	--	K02358|1e-18|pop:POPTR_552665|hypothetical protein	[J]	Translation, ribosomal structure and biogenesis	Elongation factor Tu GTP binding domain	Elongation factor Tu, mitochondrial (Precursor) GN=TUFA OS=Arabidopsis thaliana (Mouse-ear cress) PE=1 SV=1	BnaA09g45500D protein {ECO:0000313|EMBL:CDY33744.1} OS=Brassica napus (Rape) PE=4 SV=1	BnaA09g45500D [Brassica napus]	Brassica rapa subsp. pekinensis clone KBrB082F21, complete sequence
BnaA09g48580D	--	--	--	--	--	--	--	--	BnaA09g48580D protein {ECO:0000313|EMBL:CDY06345.1} OS=Brassica napus (Rape) PE=4 SV=1	BnaA09g48580D [Brassica napus]	Eutrema salsugineum hypothetical protein (EUTSA_v10006718mg) mRNA, complete cds
BnaA09g43970D	--	--	Cellular Component: nucleus (GO:0005634);;	--	--	--	Protein of unknown function (DUF295)	Putative F-box protein At2g04810 GN=At2g04810 OS=Arabidopsis thaliana (Mouse-ear cress) PE=4 SV=1	BnaA09g43970D protein {ECO:0000313|EMBL:CDY13895.1} OS=Brassica napus (Rape) PE=4 SV=1	BnaA09g43970D [Brassica napus]	PREDICTED: Brassica rapa putative F-box protein At2g04810 (LOC103842621), mRNA
BnaC08g37190D	--	--	--	--	--	--	--	--	BnaC08g37190D protein {ECO:0000313|EMBL:CDX81882.1} OS=Brassica napus (Rape) PE=4 SV=1	BnaC08g37190D [Brassica napus]	Brassica oleracea clone BAC B59J16, complete sequence
BnaC08g35940D	--	--	Molecular Function: calmodulin binding (GO:0005516);; Cellular Component: mitochondrion (GO:0005739);; Biological Process: auxin-activated signaling pathway (GO:0009734);;	K14488|2e-67|ath:AT2G21220|auxin-responsive protein, putative	--	--	Auxin responsive protein	Auxin-induced protein X10A OS=Glycine max (Soybean) PE=2 SV=1	Uncharacterized protein {ECO:0000313|EnsemblPlants:Bra031171.1-P} OS=Brassica rapa subsp. pekinensis (Chinese cabbage) PE=4 SV=1	PREDICTED: auxin-induced protein 15A [Brassica rapa]	PREDICTED: Brassica rapa auxin-induced protein 15A (LOC103842548), mRNA
BnaC08g44430D	[R]	General function prediction only	Molecular Function: GTPase activity (GO:0003924);; Molecular Function: GTP binding (GO:0005525);; Cellular Component: Golgi apparatus (GO:0005794);; Cellular Component: cytosol (GO:0005829);; Biological Process: GTP catabolic process (GO:0006184);; Biological Process: intracellular protein transport (GO:0006886);; Biological Process: nucleocytoplasmic transport (GO:0006913);; Biological Process: …	K07976|1e-138|ath:AT1G05810|RABA5E	[U]	Intracellular trafficking, secretion, and vesicular transport	Ras family;; Miro-like protein;; ADP-ribosylation factor family;; 50S ribosome-binding GTPase	Ras-related protein RABA5e (Precursor) GN=T20M3.8 OS=Arabidopsis thaliana (Mouse-ear cress) PE=2 SV=1	BnaC08g44430D protein {ECO:0000313|EMBL:CDY10008.1} OS=Brassica napus (Rape) PE=4 SV=1	BnaC08g44430D [Brassica napus]	PREDICTED: Brassica rapa ras-related protein RABA5e (LOC103843589), mRNA
BnaA09g44430D	[E]	Amino acid transport and metabolism	Cellular Component: plasma membrane (GO:0005886);; Biological Process: iron ion transport (GO:0006826);; Biological Process: oligopeptide transport (GO:0006857);; Biological Process: cellular response to iron ion starvation (GO:0010106);; Biological Process: response to nitrate (GO:0010167);; Molecular Function: nitrate transmembrane transporter activity (GO:0015112);; Biological Process: phloem …	--	[E]	Amino acid transport and metabolism	POT family	Protein NRT1/ PTR FAMILY 2.9 GN=F6A14.2 OS=Arabidopsis thaliana (Mouse-ear cress) PE=1 SV=1	BnaA09g44430D protein {ECO:0000313|EMBL:CDY21692.1} OS=Brassica napus (Rape) PE=4 SV=1	BnaA09g44430D [Brassica napus]	PREDICTED: Brassica rapa protein NRT1/ PTR FAMILY 2.9-like (LOC103842675), mRNA
BnaA09g45180D	--	--	Biological Process: mRNA splicing, via spliceosome (GO:0000398);; Molecular Function: DNA binding (GO:0003677);; Cellular Component: spliceosomal complex (GO:0005681);; Biological Process: regulation of transcription, DNA-templated (GO:0006355);; Cellular Component: nuclear lumen (GO:0031981);; Biological Process: regulation of circadian rhythm (GO:0042752);;	K13103|0.0|ath:AT1G17070|D111/G-patch domain-containing protein	[A]	RNA processing and modification	GC-rich sequence DNA-binding factor-like protein;; Tuftelin interacting protein N terminal;; G-patch domain;; DExH-box splicing factor binding site;; Potassium voltage-gated channel	Septin and tuftelin-interacting protein 1 homolog 1 GN=STIPL1 OS=Arabidopsis thaliana (Mouse-ear cress) PE=2 SV=1	BnaA09g45180D protein {ECO:0000313|EMBL:CDY21767.1} OS=Brassica napus (Rape) PE=3 SV=1	BnaA09g45180D [Brassica napus]	PREDICTED: Brassica rapa septin and tuftelin-interacting protein 1 homolog 1 (LOC103842813), mRNA
BnaC08g42990D	--	--	--	--	--	--	Plant protein of unknown function (DUF936)	--	BnaC08g42990D protein {ECO:0000313|EMBL:CDY22665.1} OS=Brassica napus (Rape) PE=4 SV=1	BnaC08g42990D [Brassica napus]	PREDICTED: Brassica rapa uncharacterized LOC103843380 (LOC103843380), transcript variant X2, mRNA
BnaA09g49830D	[R]	General function prediction only	Cellular Component: cytosol (GO:0005829);; Molecular Function: oxidoreductase activity, acting on paired donors, with incorporation or reduction of molecular oxygen, 2-oxoglutarate as one donor, and incorporation of one atom each of oxygen into both donors (GO:0016706);; Biological Process: oxidation-reduction process (GO:0055114);;	--	[QR]	--	2OG-Fe(II) oxygenase superfamily	1-aminocyclopropane-1-carboxylate oxidase homolog 3 GN=At1g06650 OS=Arabidopsis thaliana (Mouse-ear cress) PE=2 SV=1	BnaA09g49830D protein {ECO:0000313|EMBL:CDY06220.1} OS=Brassica napus (Rape) PE=4 SV=1	BnaA09g49830D [Brassica napus]	PREDICTED: Brassica rapa 1-aminocyclopropane-1-carboxylate oxidase homolog 3-like (LOC103843543), transcript variant X2, mRNA
BnaA09g44900D	--	--	Biological Process: MAPK cascade (GO:0000165);; Biological Process: response to cold (GO:0009409);; Cellular Component: chloroplast (GO:0009507);; Biological Process: salicylic acid biosynthetic process (GO:0009697);; Biological Process: systemic acquired resistance, salicylic acid mediated signaling pathway (GO:0009862);; Biological Process: regulation of hydrogen peroxide metabolic process (GO:…	--	--	--	--	Toll/interleukin-1 receptor-like protein GN=TIR OS=Arabidopsis thaliana (Mouse-ear cress) PE=1 SV=1	BnaA09g44900D protein {ECO:0000313|EMBL:CDY21739.1} OS=Brassica napus (Rape) PE=4 SV=1	BnaA09g44900D [Brassica napus]	PREDICTED: Brassica rapa putative disease resistance protein At4g11170 (LOC103842740), mRNA
BnaC08g44020D	[S]	Function unknown	--	--	[R]	General function prediction only	Leucine rich repeat;; Leucine Rich Repeat;; Leucine Rich repeats (2 copies);; Leucine Rich repeat;; Leucine rich repeat	Receptor-like protein 12 (Precursor) GN=RLP12 OS=Arabidopsis thaliana (Mouse-ear cress) PE=2 SV=2	BnaC08g44020D protein {ECO:0000313|EMBL:CDY10049.1} OS=Brassica napus (Rape) PE=4 SV=1	BnaC08g44020D [Brassica napus]	Brassica rapa subsp. pekinensis clone KBrB017P15, complete sequence
BnaC08g40480D	--	--	Biological Process: transition metal ion transport (GO:0000041);; Molecular Function: DNA binding (GO:0003677);; Molecular Function: chromatin binding (GO:0003682);; Molecular Function: sequence-specific DNA binding transcription factor activity (GO:0003700);; Molecular Function: histidine-tRNA ligase activity (GO:0004821);; Cellular Component: nucleus (GO:0005634);; Cellular Component: mitochond…	--	--	--	Myb-like DNA-binding domain	Transcription factor PCL1 OS=Oryza sativa subsp. japonica (Rice) PE=2 SV=1	BnaC08g40480D protein {ECO:0000313|EMBL:CDY16075.1} OS=Brassica napus (Rape) PE=4 SV=1	BnaC08g40480D [Brassica napus]	Arabidopsis lyrata subsp. lyrata myb family transcription factor, mRNA
BnaA09g50490D	--	--	--	--	--	--	GCK domain	--	BnaA09g50490D protein {ECO:0000313|EMBL:CDY06154.1} OS=Brassica napus (Rape) PE=4 SV=1	BnaA09g50490D [Brassica napus]	Brassica rapa subsp. pekinensis clone KBrB017P15, complete sequence
BnaA09g44630D	--	--	Biological Process: proteolysis (GO:0006508);; Molecular Function: peptidase activity (GO:0008233);;	--	--	--	Probable lipid transfer;; Protease inhibitor/seed storage/LTP family	Non-specific lipid transfer protein GPI-anchored 1 (Precursor) GN=LTPG1 OS=Arabidopsis thaliana (Mouse-ear cress) PE=1 SV=1	BnaA09g44630D protein {ECO:0000313|EMBL:CDY21712.1} OS=Brassica napus (Rape) PE=4 SV=1	BnaA09g44630D [Brassica napus]	PREDICTED: Brassica rapa lipid transfer-like protein VAS (LOC103842707), mRNA
BnaC08g39160D	[IQR]	--	Molecular Function: nucleotide binding (GO:0000166);; Cellular Component: cytoplasm (GO:0005737);; Molecular Function: oxidoreductase activity (GO:0016491);; Biological Process: oxidation-reduction process (GO:0055114);;	--	[R]	General function prediction only	short chain dehydrogenase	Short-chain dehydrogenase reductase 3b GN=F14M4 OS=Arabidopsis thaliana (Mouse-ear cress) PE=2 SV=1	BnaC08g39160D protein {ECO:0000313|EMBL:CDX81685.1} OS=Brassica napus (Rape) PE=4 SV=1	BnaC08g39160D [Brassica napus]	PREDICTED: Brassica rapa short-chain dehydrogenase reductase 3b-like (LOC103843179), mRNA
BnaC08g41520D	--	--	--	--	[R]	General function prediction only	PPR repeat family;; PPR repeat;; PPR repeat;; Pentatricopeptide repeat domain	Pentatricopeptide repeat-containing protein At3g22470, mitochondrial (Precursor) GN=At3g22470 OS=Arabidopsis thaliana (Mouse-ear cress) PE=2 SV=1	BnaC08g41520D protein {ECO:0000313|EMBL:CDY15971.1} OS=Brassica napus (Rape) PE=4 SV=1	BnaC08g41520D [Brassica napus]	PREDICTED: Brassica rapa pentatricopeptide repeat-containing protein At3g22470, mitochondrial-like (LOC103843027), mRNA
BnaC08g43060D	[E]	Amino acid transport and metabolism	Molecular Function: threonine aldolase activity (GO:0004793);; Cellular Component: cytoplasm (GO:0005737);; Biological Process: threonine catabolic process (GO:0006567);; Biological Process: response to sucrose (GO:0009744);; Biological Process: response to fructose (GO:0009750);; Molecular Function: pyridoxal phosphate binding (GO:0030170);;	K01620|0.0|ath:AT1G08630|THA1	[E]	Amino acid transport and metabolism	Beta-eliminating lyase;; Aminotransferase class I and II;; DegT/DnrJ/EryC1/StrS aminotransferase family;; Cys/Met metabolism PLP-dependent enzyme	Probable low-specificity L-threonine aldolase 1 GN=THA1 OS=Arabidopsis thaliana (Mouse-ear cress) PE=1 SV=1	BnaC08g43060D protein {ECO:0000313|EMBL:CDY22672.1} OS=Brassica napus (Rape) PE=4 SV=1	BnaC08g43060D [Brassica napus]	PREDICTED: Brassica rapa probable low-specificity L-threonine aldolase 1 (LOC103843388), transcript variant X5, mRNA
BnaA09g49310D	--	--	Cellular Component: mitochondrion (GO:0005739);; Biological Process: response to cadmium ion (GO:0046686);;	--	[R]	General function prediction only	PPR repeat family;; PPR repeat;; Pentatricopeptide repeat domain;; PPR repeat	Pentatricopeptide repeat-containing protein At1g07590, mitochondrial (Precursor) GN=At1g07590 OS=Arabidopsis thaliana (Mouse-ear cress) PE=2 SV=1	BnaA09g49310D protein {ECO:0000313|EMBL:CDY06272.1} OS=Brassica napus (Rape) PE=4 SV=1	BnaA09g49310D [Brassica napus]	PREDICTED: Brassica rapa pentatricopeptide repeat-containing protein At1g07590, mitochondrial (LOC103843443), mRNA
BnaC08g34450D	--	--	Molecular Function: spermidine:sinapoyl CoA N-acyltransferase activity (GO:0080072);; Molecular Function: sinapoyl spermidine:sinapoyl CoA N-acyltransferase activity (GO:0080089);;	--	--	--	--	--	BnaC08g34450D protein {ECO:0000313|EMBL:CDX76859.1} OS=Brassica napus (Rape) PE=4 SV=1	BnaC08g34450D [Brassica napus]	PREDICTED: Brassica rapa 3'-N-debenzoyl-2'-deoxytaxol N-benzoyltransferase-like (LOC103842408), mRNA
BnaC08g41670D	--	--	Cellular Component: extracellular region (GO:0005576);;	--	--	--	Stigma-specific protein, Stig1	--	BnaC08g41670D protein {ECO:0000313|EMBL:CDY34608.1} OS=Brassica napus (Rape) PE=4 SV=1	BnaC08g41670D [Brassica napus]	PREDICTED: Brassica rapa uncharacterized LOC103843210 (LOC103843210), mRNA
BnaC08g43830D	--	--	Molecular Function: sequence-specific DNA binding transcription factor activity (GO:0003700);; Cellular Component: nucleus (GO:0005634);; Biological Process: regulation of transcription, DNA-templated (GO:0006355);; Biological Process: auxin-activated signaling pathway (GO:0009734);; Molecular Function: identical protein binding (GO:0042802);; Molecular Function: protein dimerization activity (GO…	K14484|1e-146|ath:AT1G04250|AXR3	--	--	AUX/IAA family	Auxin-responsive protein IAA17 GN=F19P19.31 OS=Arabidopsis thaliana (Mouse-ear cress) PE=1 SV=2	Auxin-responsive protein {ECO:0000256|RuleBase:RU004549} OS=Brassica napus (Rape) PE=3 SV=1	BnaC08g43830D [Brassica napus]	PREDICTED: Brassica rapa auxin-responsive protein IAA17-like (LOC103843662), mRNA
BnaA09g48560D	[O]	Posttranslational modification, protein turnover, chaperones	Molecular Function: ATP binding (GO:0005524);; Cellular Component: endoplasmic reticulum lumen (GO:0005788);; Biological Process: protein folding (GO:0006457);; Biological Process: response to heat (GO:0009408);; Cellular Component: chloroplast (GO:0009507);; Biological Process: response to high light intensity (GO:0009644);; Biological Process: pollen tube growth (GO:0009860);; Biological Proces…	--	[O]	Posttranslational modification, protein turnover, chaperones	Hsp70 protein	Probable mediator of RNA polymerase II transcription subunit 37b (Precursor) GN=At1g09080 OS=Arabidopsis thaliana (Mouse-ear cress) PE=1 SV=1	BnaA09g48560D protein {ECO:0000313|EMBL:CDY06347.1} OS=Brassica napus (Rape) PE=3 SV=1	BnaA09g48560D [Brassica napus]	PREDICTED: Brassica rapa probable mediator of RNA polymerase II transcription subunit 37b (LOC103843363), mRNA
BnaA09g49870D	[ER]	--	Molecular Function: 4-hydroxyphenylpyruvate dioxygenase activity (GO:0003868);; Cellular Component: mitochondrion (GO:0005739);; Cellular Component: cytosol (GO:0005829);; Biological Process: aromatic amino acid family metabolic process (GO:0009072);; Cellular Component: chloroplast (GO:0009507);; Biological Process: vitamin E biosynthetic process (GO:0010189);; Biological Process: plastoquinone …	K00457|0.0|ath:AT1G06570|PDS1	[E]	Amino acid transport and metabolism	Glyoxalase/Bleomycin resistance protein/Dioxygenase superfamily;; Glyoxalase/Bleomycin resistance protein/Dioxygenase superfamily	4-hydroxyphenylpyruvate dioxygenase GN=F12K11.9 OS=Arabidopsis thaliana (Mouse-ear cress) PE=1 SV=2	4-hydroxyphenylpyruvate dioxygenase {ECO:0000256|PIRNR:PIRNR009283} OS=Brassica napus (Rape) PE=3 SV=1	4-hydroxyphenylpyruvate dioxygenase [Brassica napus]	PREDICTED: Brassica rapa 4-hydroxyphenylpyruvate dioxygenase (LOC103843547), mRNA
BnaC08g40100D	--	--	--	--	--	--	YqaJ-like viral recombinase domain	--	BnaC08g40100D protein {ECO:0000313|EMBL:CDY16113.1} OS=Brassica napus (Rape) PE=4 SV=1	BnaC08g40100D [Brassica napus]	PREDICTED: Brassica rapa uncharacterized LOC103843028 (LOC103843028), mRNA
BnaA09g50370D	--	--	Cellular Component: nucleus (GO:0005634);; Biological Process: photorespiration (GO:0009853);;	--	--	--	--	--	BnaA09g50370D protein {ECO:0000313|EMBL:CDY06166.1} OS=Brassica napus (Rape) PE=4 SV=1	BnaA09g50370D [Brassica napus]	PREDICTED: Brassica rapa uncharacterized LOC103843621 (LOC103843621), mRNA
BnaC08g43540D	[P]	Inorganic ion transport and metabolism	Molecular Function: calcium-transporting ATPase activity (GO:0005388);; Molecular Function: ATP binding (GO:0005524);; Cellular Component: nucleus (GO:0005634);; Cellular Component: vacuolar membrane (GO:0005774);; Cellular Component: plasma membrane (GO:0005886);; Biological Process: ATP biosynthetic process (GO:0006754);; Biological Process: calcium ion transport (GO:0006816);; Biological Proce…	K01537|0.0|ath:AT1G07670|calcium-transporting ATPase	[P]	Inorganic ion transport and metabolism	E1-E2 ATPase;; Cation transporting ATPase, C-terminus;; haloacid dehalogenase-like hydrolase;; haloacid dehalogenase-like hydrolase;; Cation transporter/ATPase, N-terminus;; Putative hydrolase of sodium-potassium ATPase alpha subunit;; haloacid dehalogenase-like hydrolase	Calcium-transporting ATPase 4, endoplasmic reticulum-type GN=ECA4 OS=Arabidopsis thaliana (Mouse-ear cress) PE=2 SV=2	BnaC08g43540D protein {ECO:0000313|EMBL:CDY22720.1} (Fragment) OS=Brassica napus (Rape) PE=3 SV=1	BnaC08g43540D, partial [Brassica napus]	PREDICTED: Brassica rapa calcium-transporting ATPase 4, endoplasmic reticulum-type (LOC103843435), mRNA
BnaA09g51380D	--	--	--	--	--	--	--	--	BnaA09g51380D protein {ECO:0000313|EMBL:CDY32458.1} OS=Brassica napus (Rape) PE=4 SV=1	BnaA09g51380D [Brassica napus]	Arabidopsis lyrata subsp. lyrata expressed protein, mRNA
BnaC08g35850D	[Z]	Cytoskeleton	Molecular Function: microtubule motor activity (GO:0003777);; Molecular Function: ATP binding (GO:0005524);; Cellular Component: cytoplasm (GO:0005737);; Cellular Component: kinesin complex (GO:0005871);; Cellular Component: microtubule (GO:0005874);; Cellular Component: plasma membrane (GO:0005886);; Biological Process: microtubule-based movement (GO:0007018);; Molecular Function: microtubule bi…	--	[Z]	Cytoskeleton	Kinesin motor domain;; Domain of unknown function (DUF3490)	Kinesin-like protein NACK1 GN=F15H18.12 OS=Arabidopsis thaliana (Mouse-ear cress) PE=1 SV=1	Kinesin-like protein {ECO:0000256|RuleBase:RU000394} OS=Brassica napus (Rape) PE=3 SV=1	BnaC08g35850D [Brassica napus]	PREDICTED: Brassica rapa kinesin-like protein NACK1 (LOC103842540), transcript variant X2, mRNA
BnaC08g40670D	[Q]	Secondary metabolites biosynthesis, transport and catabolism	Molecular Function: monooxygenase activity (GO:0004497);; Molecular Function: iron ion binding (GO:0005506);; Molecular Function: electron carrier activity (GO:0009055);; Cellular Component: plasmodesma (GO:0009506);; Biological Process: response to nitrate (GO:0010167);; Biological Process: nitrate transport (GO:0015706);; Molecular Function: oxidoreductase activity, acting on paired donors, wit…	K00517|0.0|ath:AT1G13090|CYP71B28	[Q]	Secondary metabolites biosynthesis, transport and catabolism	Cytochrome P450	Cytochrome P450 71B28 GN=CYP71B28 OS=Arabidopsis thaliana (Mouse-ear cress) PE=2 SV=1	BnaC08g40670D protein {ECO:0000313|EMBL:CDY16056.1} OS=Brassica napus (Rape) PE=3 SV=1	BnaC08g40670D [Brassica napus]	PREDICTED: Brassica rapa cytochrome P450 71B28 (LOC103843083), transcript variant X1, mRNA
BnaA09g42690D	--	--	--	--	--	--	Arabidopsis broad-spectrum mildew resistance protein RPW8	Protein DA1-related 5 GN=DAR5 OS=Arabidopsis thaliana (Mouse-ear cress) PE=2 SV=2	BnaA09g42690D protein {ECO:0000313|EMBL:CDY13767.1} OS=Brassica napus (Rape) PE=4 SV=1	BnaA09g42690D [Brassica napus]	--
BnaC08g35250D	--	--	Biological Process: polysaccharide biosynthetic process (GO:0000271);; Biological Process: polysaccharide catabolic process (GO:0000272);; Cellular Component: cell wall (GO:0005618);; Biological Process: starch metabolic process (GO:0005982);; Biological Process: ubiquinone biosynthetic process (GO:0006744);; Cellular Component: chloroplast thylakoid (GO:0009534);; Biological Process: plant-type …	K02372|3e-18|ath:AT2G22230|beta-hydroxyacyl-ACP dehydratase, putative	--	--	--	--	BnaC08g35250D protein {ECO:0000313|EMBL:CDX76939.1} OS=Brassica napus (Rape) PE=4 SV=1	BnaC08g35250D [Brassica napus]	PREDICTED: Brassica rapa uncharacterized LOC103837905 (LOC103837905), mRNA
BnaA09g50900D	[R]	General function prediction only	Cellular Component: cytoplasm (GO:0005737);; Molecular Function: N-acetyltransferase activity (GO:0008080);; Biological Process: metabolic process (GO:0008152);;	--	[R]	General function prediction only	Acetyltransferase (GNAT) family;; Acetyltransferase (GNAT) domain;; Acetyltransferase (GNAT) domain;; FR47-like protein;; Acetyltransferase (GNAT) domain	--	BnaA09g50900D protein {ECO:0000313|EMBL:CDY32506.1} OS=Brassica napus (Rape) PE=4 SV=1	PREDICTED: N-terminal acetyltransferase A complex catalytic subunit ARD1 [Brassica rapa]	PREDICTED: Brassica rapa N-terminal acetyltransferase A complex catalytic subunit ARD1 (LOC103843694), mRNA
BnaA09g43300D	--	--	Cellular Component: intracellular part (GO:0044424);;	--	--	--	bZIP transcription factor;; Basic region leucine zipper	Transcription factor RF2b GN=RF2b OS=Oryza sativa subsp. japonica (Rice) PE=1 SV=1	BnaA09g43300D protein {ECO:0000313|EMBL:CDY13828.1} OS=Brassica napus (Rape) PE=4 SV=1	BnaA09g43300D [Brassica napus]	PREDICTED: Brassica rapa uncharacterized LOC103842546 (LOC103842546), transcript variant X2, mRNA
BnaC08g44270D	--	--	Cellular Component: nucleus (GO:0005634);; Biological Process: negative regulation of transcription, DNA-templated (GO:0045892);;	--	--	--	Transcriptional repressor, ovate	Transcription repressor OFP12 GN=OFP12 OS=Arabidopsis thaliana (Mouse-ear cress) PE=1 SV=1	BnaC08g44270D protein {ECO:0000313|EMBL:CDY10024.1} OS=Brassica napus (Rape) PE=4 SV=1	BnaC08g44270D [Brassica napus]	PREDICTED: Brassica rapa transcription repressor OFP12-like (LOC103843602), mRNA
BnaA09g42560D	--	--	Molecular Function: dicarboxylic acid transmembrane transporter activity (GO:0005310);; Cellular Component: mitochondrial inner membrane (GO:0005743);; Biological Process: dicarboxylic acid transport (GO:0006835);; Biological Process: mitochondrial transport (GO:0006839);; Biological Process: response to chitin (GO:0010200);; Biological Process: proton transport (GO:0015992);; Cellular Component:…	--	[C]	Energy production and conversion	Mitochondrial carrier protein	Mitochondrial uncoupling protein 5 GN=F14M13.10 OS=Arabidopsis thaliana (Mouse-ear cress) PE=2 SV=1	BnaA09g42560D protein {ECO:0000313|EMBL:CDY13754.1} OS=Brassica napus (Rape) PE=3 SV=1	BnaA09g42560D [Brassica napus]	Brassica rapa subsp. pekinensis clone KBrH070I10, complete sequence
BnaC08g36850D	[K]	Transcription	Cellular Component: cytoplasmic mRNA processing body (GO:0000932);; Molecular Function: protein binding (GO:0005515);; Cellular Component: nucleus (GO:0005634);; Cellular Component: small nucleolar ribonucleoprotein complex (GO:0005732);; Biological Process: vegetative to reproductive phase transition of meristem (GO:0010228);; Biological Process: RNA metabolic process (GO:0016070);;	--	[A]	RNA processing and modification	LSM domain	Sm-like protein LSM1A {ECO:0000305} OS=Arabidopsis thaliana (Mouse-ear cress) PE=1 SV=1	BnaC08g36850D protein {ECO:0000313|EMBL:CDX81916.1} OS=Brassica napus (Rape) PE=4 SV=1	BnaC08g36850D [Brassica napus]	PREDICTED: Brassica rapa probable U6 snRNA-associated Sm-like protein LSm1 (LOC103842663), mRNA
BnaA09g42260D	--	--	--	--	--	--	Phytosulfokine precursor protein (PSK)	Phytosulfokine-beta (Precursor) GN=PSK OS=Asparagus officinalis (Garden asparagus) PE=1 SV=1	BnaA09g42260D protein {ECO:0000313|EMBL:CDY49441.1} OS=Brassica napus (Rape) PE=4 SV=1	BnaA09g42260D [Brassica napus]	PREDICTED: Brassica rapa uncharacterized LOC103842449 (LOC103842449), mRNA
BnaA09g43640D	[RTKL]	--	Molecular Function: protein serine/threonine kinase activity (GO:0004674);; Molecular Function: ATP binding (GO:0005524);; Cellular Component: nucleus (GO:0005634);; Biological Process: protein phosphorylation (GO:0006468);;	--	[D]	Cell cycle control, cell division, chromosome partitioning	Mad3/BUB1 homology region 1;; Protein kinase domain	Mitotic checkpoint serine/threonine-protein kinase BUB1 GN=BUB1 OS=Arabidopsis thaliana (Mouse-ear cress) PE=1 SV=1	BnaA09g43640D protein {ECO:0000313|EMBL:CDY13862.1} OS=Brassica napus (Rape) PE=4 SV=1	BnaA09g43640D [Brassica napus]	PREDICTED: Brassica rapa mitotic checkpoint serine/threonine-protein kinase BUB1 (LOC103842586), mRNA
BnaC08g39280D	--	--	Molecular Function: nucleotide binding (GO:0000166);; Molecular Function: transporter activity (GO:0005215);; Cellular Component: plasma membrane (GO:0005886);; Biological Process: transport (GO:0006810);; Biological Process: aspartate family amino acid biosynthetic process (GO:0009067);; Cellular Component: chloroplast (GO:0009507);; Molecular Function: oxidoreductase activity, acting on the ald…	--	[I]	Lipid transport and metabolism	CRAL/TRIO domain;; Divergent CRAL/TRIO domain	Phosphatidylinositol/phosphatidylcholine transfer protein SFH13 GN=SFH13 OS=Arabidopsis thaliana (Mouse-ear cress) PE=2 SV=1	BnaC08g39280D protein {ECO:0000313|EMBL:CDX81673.1} OS=Brassica napus (Rape) PE=4 SV=1	BnaC08g39280D [Brassica napus]	PREDICTED: Brassica rapa CRAL-TRIO domain-containing protein YKL091C-like (LOC103842941), mRNA
BnaA09g46380D	[R]	General function prediction only	--	K07874|1e-17|ath:AT4G17530|ATRAB1C	[TU]	--	Ras family	Ras-related protein RABD2c OS=Arabidopsis thaliana (Mouse-ear cress) PE=2 SV=1	BnaA09g46380D protein {ECO:0000313|EMBL:CDY26639.1} OS=Brassica napus (Rape) PE=4 SV=1	BnaA09g46380D [Brassica napus]	PREDICTED: Brassica rapa uncharacterized LOC103866926 (LOC103866926), ncRNA
BnaC08g41290D	--	--	Molecular Function: nucleic acid binding (GO:0003676);; Cellular Component: nucleus (GO:0005634);;	--	--	--	--	--	BnaC08g41290D protein {ECO:0000313|EMBL:CDY15994.1} OS=Brassica napus (Rape) PE=4 SV=1	BnaC08g41290D [Brassica napus]	PREDICTED: Brassica rapa uncharacterized LOC103843133 (LOC103843133), mRNA
BnaA09g47970D	--	--	Biological Process: heat acclimation (GO:0010286);;	--	--	--	F-box domain	F-box protein At1g11270 GN=At1g11270 OS=Arabidopsis thaliana (Mouse-ear cress) PE=2 SV=1	BnaA09g47970D protein {ECO:0000313|EMBL:CDY34871.1} OS=Brassica napus (Rape) PE=4 SV=1	BnaA09g47970D [Brassica napus]	PREDICTED: Brassica rapa F-box protein At1g11270-like (LOC103843282), mRNA
BnaC08g37790D	[R]	General function prediction only	Molecular Function: nucleotide binding (GO:0000166);; Molecular Function: mRNA 3'-UTR binding (GO:0003730);; Cellular Component: cytosol (GO:0005829);;	--	[R]	General function prediction only	RNA recognition motif. (a.k.a. RRM, RBD, or RNP domain);; RNA recognition motif (a.k.a. RRM, RBD, or RNP domain);; RNA recognition motif. (a.k.a. RRM, RBD, or RNP domain);; No apical meristem (NAM) protein	Oligouridylate-binding protein 1B GN=UBP1B OS=Arabidopsis thaliana (Mouse-ear cress) PE=1 SV=1	BnaC08g37790D protein {ECO:0000313|EMBL:CDX81822.1} OS=Brassica napus (Rape) PE=4 SV=1	BnaC08g37790D [Brassica napus]	PREDICTED: Brassica rapa oligouridylate-binding protein 1B (LOC103842756), mRNA
BnaA09g50440D	[C]	Energy production and conversion	Cellular Component: mitochondrion (GO:0005739);; Biological Process: tricarboxylic acid cycle (GO:0006099);; Biological Process: mitochondrial electron transport, succinate to ubiquinone (GO:0006121);; Molecular Function: succinate dehydrogenase (ubiquinone) activity (GO:0008177);; Molecular Function: electron carrier activity (GO:0009055);; Cellular Component: succinate dehydrogenase complex (GO…	K00235|2e-87|ath:AT5G65165|SDH2-3	[C]	Energy production and conversion	4Fe-4S dicluster domain;; 4Fe-4S dicluster domain;; 4Fe-4S dicluster domain	Succinate dehydrogenase [ubiquinone] iron-sulfur subunit 3, mitochondrial (Precursor) GN=SDH2-3 OS=Arabidopsis thaliana (Mouse-ear cress) PE=2 SV=1	BnaA09g50440D protein {ECO:0000313|EMBL:CDY06159.1} OS=Brassica napus (Rape) PE=4 SV=1	BnaA09g50440D [Brassica napus]	PREDICTED: Brassica rapa succinate dehydrogenase [ubiquinone] iron-sulfur subunit 3, mitochondrial (LOC103855282), mRNA
BnaC08g39030D	--	--	Cellular Component: mitochondrial respiratory chain complex III (GO:0005750);; Biological Process: glycolysis (GO:0006096);; Biological Process: mitochondrial electron transport, ubiquinol to cytochrome c (GO:0006122);; Biological Process: ubiquitin-dependent protein catabolic process (GO:0006511);; Molecular Function: ubiquinol-cytochrome-c reductase activity (GO:0008121);; Biological Process: a…	K00416|2e-43|pop:POPTR_551330|hypothetical protein	[C]	Energy production and conversion	Ubiquinol-cytochrome C reductase hinge protein	Cytochrome b-c1 complex subunit 6 OS=Solanum tuberosum (Potato) PE=1 SV=2	Cytochrome b-c1 complex subunit 6 {ECO:0000256|PIRNR:PIRNR000019} OS=Brassica napus (Rape) PE=3 SV=1	BnaC08g39030D [Brassica napus]	PREDICTED: Brassica rapa cytochrome b-c1 complex subunit 6-like (LOC103842917), mRNA
BnaA09g45310D	--	--	--	--	--	--	--	--	BnaA09g45310D protein {ECO:0000313|EMBL:CDY33725.1} OS=Brassica napus (Rape) PE=4 SV=1	BnaA09g45310D [Brassica napus]	PREDICTED: Brassica rapa uncharacterized LOC103842927 (LOC103842927), mRNA
BnaC08g34770D	--	--	Cellular Component: endosome (GO:0005768);; Cellular Component: Golgi apparatus (GO:0005794);; Cellular Component: trans-Golgi network (GO:0005802);;	--	--	--	--	Protein Ycf2 (Fragment) GN=ycf2 OS=Oenothera picensis (Evening primrose) PE=3 SV=1	BnaC08g34770D protein {ECO:0000313|EMBL:CDX76891.1} OS=Brassica napus (Rape) PE=4 SV=1	BnaC08g34770D [Brassica napus]	PREDICTED: Brassica rapa myb-like protein X (LOC103842455), transcript variant X1, mRNA
BnaA09g50050D	[R]	General function prediction only	Molecular Function: hydroxyacylglutathione hydrolase activity (GO:0004416);; Molecular Function: iron ion binding (GO:0005506);; Cellular Component: mitochondrion (GO:0005739);; Biological Process: glutathione biosynthetic process (GO:0006750);; Biological Process: membrane fusion (GO:0006944);; Molecular Function: zinc ion binding (GO:0008270);; Cellular Component: chloroplast (GO:0009507);; Bio…	--	[R]	General function prediction only	Metallo-beta-lactamase superfamily	Probable hydroxyacylglutathione hydrolase 2, chloroplast (Precursor) GN=GLX2-4 OS=Arabidopsis thaliana (Mouse-ear cress) PE=2 SV=1	BnaA09g50050D protein {ECO:0000313|EMBL:CDY06198.1} OS=Brassica napus (Rape) PE=3 SV=1	BnaA09g50050D [Brassica napus]	PREDICTED: Brassica rapa probable hydroxyacylglutathione hydrolase 2, chloroplast (LOC103843568), mRNA
BnaC08g34180D	--	--	--	--	--	--	Zein-binding	--	BnaC08g34180D protein {ECO:0000313|EMBL:CDX76832.1} OS=Brassica napus (Rape) PE=4 SV=1	BnaC08g34180D [Brassica napus]	PREDICTED: Brassica rapa autophagy-related protein 11 (LOC103842379), mRNA
BnaC08g38950D	--	--	--	--	[L]	Replication, recombination and repair	Domain of unknown function (DUF4413);; hAT family C-terminal dimerisation region	Zinc finger BED domain-containing protein DAYSLEEPER GN=HAT OS=Arabidopsis thaliana (Mouse-ear cress) PE=1 SV=1	BnaC08g38950D protein {ECO:0000313|EMBL:CDX81706.1} OS=Brassica napus (Rape) PE=4 SV=1	BnaC08g38950D [Brassica napus]	PREDICTED: Brassica rapa zinc finger BED domain-containing protein DAYSLEEPER-like (LOC103843174), mRNA
BnaC08g36840D	[I]	Lipid transport and metabolism	Biological Process: MAPK cascade (GO:0000165);; Molecular Function: protein binding (GO:0005515);; Cellular Component: nucleus (GO:0005634);; Biological Process: protein targeting to membrane (GO:0006612);; Biological Process: response to cold (GO:0009409);; Biological Process: response to water deprivation (GO:0009414);; Biological Process: pollen development (GO:0009555);; Biological Process: r…	K13464|1e-126|ath:AT1G19180|JAZ1	--	--	alpha/beta hydrolase fold;; tify domain;; Divergent CCT motif;; Carboxylesterase family	Protein TIFY 10A GN=T29M8.5 OS=Arabidopsis thaliana (Mouse-ear cress) PE=1 SV=1	BnaC08g36840D protein {ECO:0000313|EMBL:CDX81917.1} OS=Brassica napus (Rape) PE=4 SV=1	BnaC08g36840D [Brassica napus]	PREDICTED: Brassica rapa protein TIFY 10A-like (LOC103842660), mRNA
BnaC08g37660D	[S]	Function unknown	Cellular Component: cytosol (GO:0005829);; Biological Process: signal transduction (GO:0007165);; Molecular Function: ADP binding (GO:0043531);; Biological Process: innate immune response (GO:0045087);;	--	--	--	NB-ARC domain;; TIR domain;; TIR domain;; Leucine rich repeat;; Leucine Rich repeats (2 copies);; Leucine Rich Repeat	Putative disease resistance protein At4g11170 GN=At4g11170 OS=Arabidopsis thaliana (Mouse-ear cress) PE=2 SV=1	BnaC08g37660D protein {ECO:0000313|EMBL:CDX81835.1} OS=Brassica napus (Rape) PE=4 SV=1	BnaC08g37660D [Brassica napus]	Brassica rapa subsp. pekinensis isolate BrTNL34 disease resistance protein gene, complete cds
BnaA09g42030D	[R]	General function prediction only	Molecular Function: nucleotide binding (GO:0000166);; Molecular Function: translation initiation factor activity (GO:0003743);; Molecular Function: protein binding (GO:0005515);; Cellular Component: cytosol (GO:0005829);; Biological Process: translational initiation (GO:0006413);; Biological Process: response to cadmium ion (GO:0046686);;	--	[AJ]	--	RNA recognition motif. (a.k.a. RRM, RBD, or RNP domain);; RNA recognition motif (a.k.a. RRM, RBD, or RNP domain);; RNA recognition motif. (a.k.a. RRM, RBD, or RNP domain);; Poly-adenylate binding protein, unique domain;; Limkain b1;; RNA binding motif	Polyadenylate-binding protein 4 GN=PAB4 OS=Arabidopsis thaliana (Mouse-ear cress) PE=1 SV=1	BnaA09g42030D protein {ECO:0000313|EMBL:CDY46079.1} OS=Brassica napus (Rape) PE=4 SV=1	BnaA09g42030D [Brassica napus]	PREDICTED: Brassica rapa polyadenylate-binding protein 4-like (LOC103842418), mRNA
BnaC08g35920D	--	--	--	--	--	--	bZIP transcription factor;; Basic region leucine zipper	Probable transcription factor PosF21 GN=T28P16.14 OS=Arabidopsis thaliana (Mouse-ear cress) PE=2 SV=1	BnaC08g35920D protein {ECO:0000313|EMBL:CDX82009.1} OS=Brassica napus (Rape) PE=4 SV=1	BnaC08g35920D [Brassica napus]	PREDICTED: Brassica rapa uncharacterized LOC103842546 (LOC103842546), transcript variant X2, mRNA
BnaC08g42750D	--	--	--	--	--	--	Plant self-incompatibility protein S1	--	BnaC08g42750D protein {ECO:0000313|EMBL:CDY22641.1} OS=Brassica napus (Rape) PE=4 SV=1	BnaC08g42750D [Brassica napus]	PREDICTED: Brassica rapa uncharacterized LOC103843359 (LOC103843359), mRNA
BnaA09g51260D	--	--	--	--	--	--	--	--	BnaC04g55040D protein {ECO:0000313|EMBL:CDY58898.1} OS=Brassica napus (Rape) PE=4 SV=1	BnaC04g55040D [Brassica napus]	--
BnaA09g51400D	--	--	Molecular Function: DNA binding (GO:0003677);; Molecular Function: sequence-specific DNA binding transcription factor activity (GO:0003700);; Molecular Function: transcription cofactor activity (GO:0003712);; Molecular Function: protein binding (GO:0005515);; Cellular Component: nucleus (GO:0005634);; Cellular Component: cytosol (GO:0005829);; Biological Process: circadian rhythm (GO:0007623);; B…	--	--	--	Helix-loop-helix DNA-binding domain	Transcription factor HFR1 GN=At1g02340 OS=Arabidopsis thaliana (Mouse-ear cress) PE=1 SV=1	BnaA09g51400D protein {ECO:0000313|EMBL:CDY32456.1} OS=Brassica napus (Rape) PE=4 SV=1	BnaA09g51400D [Brassica napus]	PREDICTED: Brassica rapa transcription factor HFR1-like (LOC103843761), transcript variant X2, mRNA
BnaC08g40980D	[RTKL]	--	Molecular Function: protein serine/threonine kinase activity (GO:0004674);; Molecular Function: ATP binding (GO:0005524);; Cellular Component: nucleus (GO:0005634);; Biological Process: protein phosphorylation (GO:0006468);;	--	[T]	Signal transduction mechanisms	Protein kinase domain;; Protein tyrosine kinase;; Kinase-like;; RIO1 family	Serine/threonine-protein kinase PEPKR2 GN=PEPKR2 OS=Arabidopsis thaliana (Mouse-ear cress) PE=2 SV=1	BnaC08g40980D protein {ECO:0000313|EMBL:CDY16025.1} OS=Brassica napus (Rape) PE=4 SV=1	BnaC08g40980D [Brassica napus]	PREDICTED: Brassica rapa serine/threonine-protein kinase PEPKR2 (LOC103843109), mRNA
BnaC08g42310D	--	--	Cellular Component: chloroplast (GO:0009507);;	--	[O]	Posttranslational modification, protein turnover, chaperones	Cytochrome c oxidase assembly protein PET191	--	Uncharacterized protein {ECO:0000313|EnsemblPlants:Bra031744.1-P} OS=Brassica rapa subsp. pekinensis (Chinese cabbage) PE=4 SV=1	PREDICTED: cytochrome c oxidase assembly factor 5 [Brassica rapa]	PREDICTED: Brassica rapa cytochrome c oxidase assembly factor 5 (LOC103843267), transcript variant X2, mRNA
BnaA09g48340D	[R]	General function prediction only	Molecular Function: GTP binding (GO:0005525);; Cellular Component: extracellular region (GO:0005576);; Cellular Component: nucleus (GO:0005634);; Cellular Component: vacuolar membrane (GO:0005774);; Cellular Component: Golgi apparatus (GO:0005794);; Cellular Component: cytosol (GO:0005829);; Cellular Component: plasma membrane (GO:0005886);; Biological Process: phosphatidylinositol biosynthetic p…	--	[R]	General function prediction only	ADP-ribosylation factor family;; Ras family;; Miro-like protein;; 50S ribosome-binding GTPase;; Gtr1/RagA G protein conserved region	ADP-ribosylation factor 3 OS=Arabidopsis thaliana (Mouse-ear cress) PE=1 SV=2	BnaA09g48340D protein {ECO:0000313|EMBL:CDY06369.1} OS=Brassica napus (Rape) PE=4 SV=1	BnaA09g48340D [Brassica napus]	PREDICTED: Brassica rapa ADP-ribosylation factor-like protein 8A (LOC103843338), transcript variant X2, mRNA
BnaC08g39140D	--	--	Cellular Component: Golgi apparatus (GO:0005794);; Molecular Function: transferase activity, transferring glycosyl groups (GO:0016757);;	--	--	--	GDP-fucose protein O-fucosyltransferase	Uncharacterized protein At1g04910 GN=At1g04910 OS=Arabidopsis thaliana (Mouse-ear cress) PE=2 SV=1	BnaC08g39140D protein {ECO:0000313|EMBL:CDX81687.1} OS=Brassica napus (Rape) PE=4 SV=1	BnaC08g39140D [Brassica napus]	PREDICTED: Brassica rapa uncharacterized protein At1g04910-like (LOC103842929), mRNA
BnaA09g42590D	--	--	Cellular Component: nucleus (GO:0005634);; Cellular Component: cytosol (GO:0005829);; Biological Process: response to blue light (GO:0009637);; Biological Process: trichome differentiation (GO:0010026);; Biological Process: regulation of stomatal movement (GO:0010119);; Biological Process: regulation of epidermal cell division (GO:0010482);; Biological Process: D-xylose metabolic process (GO:0042…	--	--	--	GRAM domain	GLABRA2 expression modulator GN=GEM OS=Arabidopsis thaliana (Mouse-ear cress) PE=1 SV=1	BnaA09g42590D protein {ECO:0000313|EMBL:CDY13757.1} OS=Brassica napus (Rape) PE=4 SV=1	PREDICTED: GLABRA2 expression modulator [Brassica rapa]	PREDICTED: Brassica rapa GLABRA2 expression modulator (LOC103837890), mRNA
BnaA09g41600D	[R]	General function prediction only	Molecular Function: receptor activity (GO:0004872);; Cellular Component: mitochondrion (GO:0005739);; Biological Process: response to oxidative stress (GO:0006979);; Biological Process: response to hormone (GO:0009725);; Biological Process: response to sucrose (GO:0009744);; Cellular Component: integral component of membrane (GO:0016021);; Biological Process: sterol biosynthetic process (GO:00161…	--	[RT]	--	Haemolysin-III related	Heptahelical transmembrane protein 3 GN=HHP3 OS=Arabidopsis thaliana (Mouse-ear cress) PE=2 SV=2	BnaA09g41600D protein {ECO:0000313|EMBL:CDY34793.1} OS=Brassica napus (Rape) PE=4 SV=1	BnaA09g41600D [Brassica napus]	PREDICTED: Brassica rapa ADIPOR-like receptor SPBC12C2.09c (LOC103842378), mRNA
BnaA09g50850D	--	--	--	--	[DR]	--	MATH domain	MATH domain and coiled-coil domain-containing protein At2g42460 GN=At2g42460 OS=Arabidopsis thaliana (Mouse-ear cress) PE=2 SV=1	BnaA09g50850D protein {ECO:0000313|EMBL:CDY32511.1} OS=Brassica napus (Rape) PE=4 SV=1	PREDICTED: MATH domain and coiled-coil domain-containing protein At2g42460-like [Brassica rapa]	PREDICTED: Brassica rapa MATH domain and coiled-coil domain-containing protein At2g42460-like (LOC103843686), transcript variant X3, mRNA
BnaC08g39920D	--	--	Cellular Component: Golgi apparatus (GO:0005794);; Molecular Function: fucosyltransferase activity (GO:0008417);;	K13681|0.0|ath:AT1G14080|FUT6	--	--	Xyloglucan fucosyltransferase	Probable fucosyltransferase 7 OS=Arabidopsis thaliana (Mouse-ear cress) PE=2 SV=1	BnaC08g39920D protein {ECO:0000313|EMBL:CDX81609.1} OS=Brassica napus (Rape) PE=4 SV=1	BnaC08g39920D [Brassica napus]	PREDICTED: Brassica rapa probable fucosyltransferase 7 (LOC103843003), mRNA
BnaC08g43730D	[R]	General function prediction only	Cellular Component: cytoplasm (GO:0005737);; Molecular Function: Hsp90 protein binding (GO:0051879);;	--	[O]	Posttranslational modification, protein turnover, chaperones	TPR repeat;; Tetratricopeptide repeat;; Tetratricopeptide repeat;; Tetratricopeptide repeat	Hsp70-Hsp90 organizing protein 3 GN=HOP3 OS=Arabidopsis thaliana (Mouse-ear cress) PE=2 SV=1	BnaC08g43730D protein {ECO:0000313|EMBL:CDY10078.1} OS=Brassica napus (Rape) PE=4 SV=1	BnaC08g43730D [Brassica napus]	PREDICTED: Brassica rapa tetratricopeptide repeat protein 4 homolog (LOC103843671), transcript variant X2, mRNA
BnaC08g43470D	--	--	Cellular Component: nucleus (GO:0005634);; Cellular Component: mitochondrion (GO:0005739);;	--	--	--	Protein of unknown function DUF260	LOB domain-containing protein 1 GN=F24B9.1 OS=Arabidopsis thaliana (Mouse-ear cress) PE=2 SV=1	BnaC08g43470D protein {ECO:0000313|EMBL:CDY22713.1} OS=Brassica napus (Rape) PE=4 SV=1	BnaC08g43470D [Brassica napus]	PREDICTED: Brassica rapa LOB domain-containing protein 1-like (LOC103843427), mRNA
BnaC08g36150D	--	--	Cellular Component: extracellular region (GO:0005576);; Biological Process: stomatal complex patterning (GO:0010375);; Biological Process: negative regulation of stomatal complex development (GO:2000122);;	--	--	--	--	MEPF1 {ECO:0000303|PubMed:22241782} (Precursor) OS=Arabidopsis thaliana (Mouse-ear cress) PE=1 SV=1	BnaC08g36150D protein {ECO:0000313|EMBL:CDX81986.1} OS=Brassica napus (Rape) PE=4 SV=1	BnaC08g36150D [Brassica napus]	PREDICTED: Brassica rapa protein EPIDERMAL PATTERNING FACTOR 1 (LOC103842577), mRNA
BnaC08g35930D	--	--	Molecular Function: binding (GO:0005488);; Biological Process: response to abscisic acid (GO:0009737);; Cellular Component: intracellular part (GO:0044424);; Biological Process: regulation of cellular process (GO:0050794);;	--	--	--	Basic region leucine zipper;; bZIP transcription factor	Probable transcription factor PosF21 GN=T28P16.14 OS=Arabidopsis thaliana (Mouse-ear cress) PE=2 SV=1	BnaC08g35930D protein {ECO:0000313|EMBL:CDX82008.1} OS=Brassica napus (Rape) PE=4 SV=1	BnaC08g35930D [Brassica napus]	PREDICTED: Brassica rapa probable transcription factor PosF21 (LOC103842547), mRNA
BnaC08g42370D	--	--	Cellular Component: mitochondrion (GO:0005739);; Cellular Component: plasma membrane (GO:0005886);;	--	--	--	--	--	BnaC08g42370D protein {ECO:0000313|EMBL:CDY22603.1} OS=Brassica napus (Rape) PE=4 SV=1	BnaC08g42370D [Brassica napus]	PREDICTED: Brassica rapa uncharacterized LOC103843313 (LOC103843313), mRNA
BnaC08g43280D	--	--	Molecular Function: aspartic-type endopeptidase activity (GO:0004190);; Cellular Component: extracellular region (GO:0005576);; Biological Process: proteolysis (GO:0006508);; Cellular Component: plant-type cell wall (GO:0009505);; Cellular Component: anchored component of membrane (GO:0031225);;	--	[O]	Posttranslational modification, protein turnover, chaperones	Xylanase inhibitor N-terminal;; Eukaryotic aspartyl protease;; Xylanase inhibitor C-terminal	Aspartic proteinase-like protein 2 (Precursor) GN=At1g65240 OS=Arabidopsis thaliana (Mouse-ear cress) PE=1 SV=2	BnaC08g43280D protein {ECO:0000313|EMBL:CDY22694.1} OS=Brassica napus (Rape) PE=4 SV=1	BnaC08g43280D [Brassica napus]	PREDICTED: Brassica rapa aspartic proteinase-like protein 2 (LOC103843409), mRNA
BnaA09g44450D	--	--	Molecular Function: calmodulin binding (GO:0005516);; Cellular Component: vacuole (GO:0005773);;	--	--	--	Protein of unknown function (DUF4005)	Protein IQ-DOMAIN 31 GN=IQD31 OS=Arabidopsis thaliana (Mouse-ear cress) PE=1 SV=1	BnaA09g44450D protein {ECO:0000313|EMBL:CDY21694.1} OS=Brassica napus (Rape) PE=4 SV=1	BnaA09g44450D [Brassica napus]	PREDICTED: Brassica rapa protein IQ-DOMAIN 31-like (LOC103872688), transcript variant X2, mRNA
BnaA09g43900D	--	--	Molecular Function: zinc ion binding (GO:0008270);; Biological Process: response to zinc ion (GO:0010043);; Biological Process: single-organism developmental process (GO:0044767);;	--	[O]	Posttranslational modification, protein turnover, chaperones	Ring finger domain;; RING-H2 zinc finger;; Zinc finger, C3HC4 type (RING finger);; Zinc finger, C3HC4 type (RING finger);; Zinc finger, C3HC4 type (RING finger);; Anaphase-promoting complex subunit 11 RING-H2 finger	Putative RING-H2 finger protein ATL12 (Precursor) GN=ATL12 OS=Arabidopsis thaliana (Mouse-ear cress) PE=3 SV=1	BnaA09g43900D protein {ECO:0000313|EMBL:CDY13888.1} OS=Brassica napus (Rape) PE=4 SV=1	BnaA09g43900D [Brassica napus]	PREDICTED: Brassica rapa putative RING-H2 finger protein ATL12 (LOC103842617), mRNA
BnaA09g44770D	[J]	Translation, ribosomal structure and biogenesis	--	K01868|1e-178|pop:POPTR_1085280|threonine-tRNA ligase (EC:6.1.1.3)	[J]	Translation, ribosomal structure and biogenesis	tRNA synthetase class II core domain (G, H, P, S and T);; Anticodon binding domain	Threonine--tRNA ligase, mitochondrial (Precursor) GN=THRRS OS=Arabidopsis thaliana (Mouse-ear cress) PE=2 SV=3	BnaA09g44770D protein {ECO:0000313|EMBL:CDY21726.1} OS=Brassica napus (Rape) PE=3 SV=1	BnaA09g44770D [Brassica napus]	PREDICTED: Brassica rapa threonine--tRNA ligase, mitochondrial-like (LOC103842727), transcript variant X1, mRNA
BnaC08g44600D	[I]	Lipid transport and metabolism	Biological Process: long-chain fatty acid metabolic process (GO:0001676);; Biological Process: defense response to insect (GO:0002213);; Molecular Function: transporter activity (GO:0005215);; Cellular Component: endoplasmic reticulum membrane (GO:0005789);; Cellular Component: plasma membrane (GO:0005886);; Biological Process: circadian rhythm (GO:0007623);; Cellular Component: integral componen…	K00507|0.0|ath:AT1G06080|ADS1	[I]	Lipid transport and metabolism	Fatty acid desaturase	Delta-9 acyl-lipid desaturase 1 GN=ADS1 OS=Arabidopsis thaliana (Mouse-ear cress) PE=2 SV=1	BnaC08g44600D protein {ECO:0000313|EMBL:CDY09991.1} OS=Brassica napus (Rape) PE=3 SV=1	BnaC08g44600D [Brassica napus]	PREDICTED: Brassica rapa delta-9 acyl-lipid desaturase 1-like (LOC103843572), mRNA
BnaA09g46740D	--	--	Cellular Component: extracellular region (GO:0005576);;	--	--	--	S locus-related glycoprotein 1 binding pollen coat protein (SLR1-BP)	Putative defensin-like protein 162 (Precursor) GN=LCR37 OS=Arabidopsis thaliana (Mouse-ear cress) PE=3 SV=2	BnaA09g46740D protein {ECO:0000313|EMBL:CDY26603.1} OS=Brassica napus (Rape) PE=4 SV=1	PREDICTED: defensin-like protein 163 [Brassica rapa]	PREDICTED: Brassica rapa defensin-like protein 163 (LOC103843093), mRNA
BnaA09g45760D	--	--	Cellular Component: plasma membrane (GO:0005886);; Cellular Component: integral component of membrane (GO:0016021);;	--	--	--	Domain of unknown function (DUF588)	Casparian strip membrane protein 6 GN=ARALYDRAFT_888790 OS=Arabidopsis lyrata subsp. lyrata (Lyre-leaved rock-cress) PE=3 SV=1	CASP-like protein {ECO:0000256|RuleBase:RU361233} OS=Brassica napus (Rape) PE=3 SV=1	PREDICTED: CASP-like protein ARALYDRAFT_888790 [Brassica rapa]	PREDICTED: Brassica rapa CASP-like protein ARALYDRAFT_888790 (LOC103842996), mRNA
BnaC08g42240D	--	--	Molecular Function: calmodulin binding (GO:0005516);; Cellular Component: plasma membrane (GO:0005886);; Biological Process: defense response (GO:0006952);; Biological Process: cell death (GO:0008219);; Biological Process: response to biotic stimulus (GO:0009607);; Cellular Component: integral component of membrane (GO:0016021);;	K08472|0.0|ath:AT1G11000|MLO4	--	--	Mlo family	MLO-like protein 4 GN=MLO4 OS=Arabidopsis thaliana (Mouse-ear cress) PE=2 SV=2	MLO-like protein {ECO:0000256|RuleBase:RU280816} OS=Brassica napus (Rape) PE=3 SV=1	BnaC08g42240D [Brassica napus]	PREDICTED: Brassica rapa MLO-like protein 4 (LOC103843274), transcript variant X2, mRNA
BnaC08g38100D	--	--	Biological Process: meiosis I (GO:0007127);;	--	--	--	FBD;; F-box domain;; F-box-like	Putative F-box/FBD/LRR-repeat protein At1g16940 GN=At1g16940 OS=Arabidopsis thaliana (Mouse-ear cress) PE=3 SV=1	BnaC08g38100D protein {ECO:0000313|EMBL:CDX81791.1} OS=Brassica napus (Rape) PE=4 SV=1	BnaC08g38100D [Brassica napus]	PREDICTED: Brassica rapa putative F-box/FBD/LRR-repeat protein At1g16940 (LOC103842820), transcript variant X1, mRNA
BnaA09g48150D	--	--	Molecular Function: nucleic acid binding (GO:0003676);; Molecular Function: sequence-specific DNA binding transcription factor activity (GO:0003700);; Cellular Component: nucleus (GO:0005634);; Biological Process: regulation of transcription, DNA-templated (GO:0006355);; Molecular Function: zinc ion binding (GO:0008270);; Biological Process: cytokinin-activated signaling pathway (GO:0009736);; Bi…	--	--	--	--	Zinc finger protein 5 GN=ZFP5 OS=Arabidopsis thaliana (Mouse-ear cress) PE=2 SV=1	BnaA09g48150D protein {ECO:0000313|EMBL:CDY34889.1} OS=Brassica napus (Rape) PE=4 SV=1	BnaA09g48150D [Brassica napus]	PREDICTED: Brassica rapa zinc finger protein 5-like (LOC103843297), mRNA
BnaA09g51000D	--	--	Cellular Component: nucleus (GO:0005634);; Biological Process: vacuole organization (GO:0007033);; Biological Process: signal transduction (GO:0007165);; Cellular Component: chloroplast (GO:0009507);; Biological Process: response to abscisic acid (GO:0009737);; Biological Process: multidimensional cell growth (GO:0009825);; Biological Process: trichome morphogenesis (GO:0010090);;	--	[S]	Function unknown	Beige/BEACH domain;; WD domain, G-beta repeat;; PH domain associated with Beige/BEACH	Guanine nucleotide-binding protein subunit beta-like protein OS=Nicotiana plumbaginifolia (Leadwort-leaved tobacco) PE=2 SV=1	BnaA09g51000D protein {ECO:0000313|EMBL:CDY32496.1} OS=Brassica napus (Rape) PE=4 SV=1	BnaA09g51000D [Brassica napus]	PREDICTED: Brassica rapa BEACH domain-containing protein lvsA-like (LOC103843709), mRNA
BnaA09g49270D	[S]	Function unknown	Cellular Component: extracellular region (GO:0005576);; Biological Process: response to osmotic stress (GO:0006970);; Biological Process: metabolic process (GO:0008152);; Biological Process: response to water deprivation (GO:0009414);; Molecular Function: lyase activity (GO:0016829);;	--	--	--	Glyoxalase-like domain;; Glyoxalase/Bleomycin resistance protein/Dioxygenase superfamily	--	BnaA09g49270D protein {ECO:0000313|EMBL:CDY06276.1} OS=Brassica napus (Rape) PE=4 SV=1	PREDICTED: uncharacterized protein LOC103843439 [Brassica rapa]	PREDICTED: Brassica rapa uncharacterized LOC103843439 (LOC103843439), mRNA
BnaA09g43200D	[C]	Energy production and conversion	Cellular Component: vacuolar proton-transporting V-type ATPase, V0 domain (GO:0000220);; Biological Process: cell morphogenesis (GO:0000902);; Cellular Component: mitochondrion (GO:0005739);; Cellular Component: Golgi apparatus (GO:0005794);; Cellular Component: plasma membrane (GO:0005886);; Biological Process: ATP catabolic process (GO:0006200);; Biological Process: calcium ion transport (GO:00…	K02154|0.0|ath:AT2G21410|VHA-A2	[C]	Energy production and conversion	V-type ATPase 116kDa subunit family;; V-type ATPase 116kDa subunit family	V-type proton ATPase subunit a2 GN=VHA-a2 OS=Arabidopsis thaliana (Mouse-ear cress) PE=1 SV=1	V-type proton ATPase subunit a {ECO:0000256|RuleBase:RU361189} OS=Brassica napus (Rape) PE=3 SV=1	BnaA09g43200D [Brassica napus]	PREDICTED: Brassica rapa vacuolar proton ATPase a2 (LOC103842528), mRNA
BnaC08g36100D	--	--	Cellular Component: cytoplasm (GO:0005737);; Biological Process: ER to Golgi vesicle-mediated transport (GO:0006888);;	--	[S]	Function unknown	Sedlin, N-terminal conserved region;; Sybindin-like family	--	Uncharacterized protein {ECO:0000313|EnsemblPlants:Bra031151.1-P} OS=Brassica rapa subsp. pekinensis (Chinese cabbage) PE=4 SV=1	PREDICTED: trafficking protein particle complex subunit 2-like protein [Brassica rapa]	PREDICTED: Brassica rapa trafficking protein particle complex subunit 2-like protein (LOC103842571), mRNA
BnaA09g44540D	--	--	Molecular Function: calcium ion binding (GO:0005509);; Cellular Component: extracellular region (GO:0005576);; Biological Process: aging (GO:0007568);; Cellular Component: integral component of membrane (GO:0016021);;	--	--	--	Tetraspanin family	Tetraspanin-11 GN=TET11 OS=Arabidopsis thaliana (Mouse-ear cress) PE=2 SV=1	BnaA09g44540D protein {ECO:0000313|EMBL:CDY21703.1} OS=Brassica napus (Rape) PE=4 SV=1	BnaA09g44540D [Brassica napus]	Brassica oleracea clone BAC B59J16, complete sequence
BnaC08g43050D	--	--	Biological Process: response to superoxide (GO:0000303);; Molecular Function: DNA binding (GO:0003677);; Molecular Function: sequence-specific DNA binding transcription factor activity (GO:0003700);; Cellular Component: nucleus (GO:0005634);; Cellular Component: cytoplasm (GO:0005737);; Biological Process: response to water deprivation (GO:0009414);; Biological Process: response to high light int…	--	--	--	No apical meristem (NAM) protein	NAC domain-containing protein 18 GN=F14G24.15 OS=Arabidopsis thaliana (Mouse-ear cress) PE=2 SV=1	BnaC08g43050D protein {ECO:0000313|EMBL:CDY22671.1} OS=Brassica napus (Rape) PE=4 SV=1	BnaC08g43050D [Brassica napus]	PREDICTED: Brassica rapa NAC domain-containing protein 18-like (LOC103859626), mRNA
BnaA09g45570D	--	--	--	--	[D]	Cell cycle control, cell division, chromosome partitioning	Replication factor-A C terminal domain	Replication protein A 70 kDa DNA-binding subunit B GN=F13G24.220 OS=Arabidopsis thaliana (Mouse-ear cress) PE=3 SV=1	BnaA09g45570D protein {ECO:0000313|EMBL:CDY33751.1} OS=Brassica napus (Rape) PE=4 SV=1	BnaA09g45570D [Brassica napus]	PREDICTED: Brassica rapa uncharacterized LOC103865391 (LOC103865391), mRNA
BnaC08g34790D	[OU]	--	--	--	[O]	Posttranslational modification, protein turnover, chaperones	Zinc knuckle	Cold shock domain-containing protein 3 GN=CSP3 OS=Arabidopsis thaliana (Mouse-ear cress) PE=1 SV=1	BnaC08g34790D protein {ECO:0000313|EMBL:CDX76893.1} OS=Brassica napus (Rape) PE=4 SV=1	BnaC08g34790D [Brassica napus]	PREDICTED: Brassica rapa uncharacterized LOC103842474 (LOC103842474), mRNA
BnaC08g43350D	[P]	Inorganic ion transport and metabolism	Molecular Function: monovalent cation:hydrogen antiporter activity (GO:0005451);; Cellular Component: nucleus (GO:0005634);; Biological Process: sodium ion transport (GO:0006814);; Biological Process: lithium ion transport (GO:0010351);; Cellular Component: integral component of membrane (GO:0016021);; Biological Process: transmembrane transport (GO:0055085);;	--	[P]	Inorganic ion transport and metabolism	Sodium/hydrogen exchanger family	Cation/H(+) antiporter 6B OS=Arabidopsis thaliana (Mouse-ear cress) PE=2 SV=1	BnaC08g43350D protein {ECO:0000313|EMBL:CDY22701.1} OS=Brassica napus (Rape) PE=4 SV=1	BnaC08g43350D [Brassica napus]	PREDICTED: Brassica rapa cation/H(+) antiporter 6B-like (LOC103843527), mRNA
BnaC08g37470D	[J]	Translation, ribosomal structure and biogenesis	--	K01868|1e-177|pop:POPTR_1085280|threonine-tRNA ligase (EC:6.1.1.3)	[J]	Translation, ribosomal structure and biogenesis	tRNA synthetase class II core domain (G, H, P, S and T);; Anticodon binding domain	Threonine--tRNA ligase, mitochondrial (Precursor) GN=THRRS OS=Arabidopsis thaliana (Mouse-ear cress) PE=2 SV=3	BnaC08g37470D protein {ECO:0000313|EMBL:CDX81854.1} OS=Brassica napus (Rape) PE=3 SV=1	BnaC08g37470D [Brassica napus]	PREDICTED: Brassica rapa threonine--tRNA ligase, mitochondrial-like (LOC103842727), transcript variant X2, mRNA
BnaA09g47700D	--	--	Molecular Function: single-stranded DNA endodeoxyribonuclease activity (GO:0000014);; Molecular Function: nucleic acid binding (GO:0003676);; Cellular Component: extracellular region (GO:0005576);; Biological Process: DNA catabolic process (GO:0006308);; Biological Process: leaf senescence (GO:0010150);; Molecular Function: endoribonuclease activity, producing 5'-phosphomonoesters (GO:0016891);; …	--	--	--	S1/P1 Nuclease	Endonuclease 1 (Precursor) GN=T28P6.14 OS=Arabidopsis thaliana (Mouse-ear cress) PE=1 SV=1	BnaA09g47700D protein {ECO:0000313|EMBL:CDY34844.1} OS=Brassica napus (Rape) PE=4 SV=1	BnaA09g47700D [Brassica napus]	PREDICTED: Brassica rapa endonuclease 1-like (LOC103843249), mRNA
BnaC08g40850D	[G]	Carbohydrate transport and metabolism	Cellular Component: cytosol (GO:0005829);; Biological Process: glycolysis (GO:0006096);; Biological Process: rRNA processing (GO:0006364);; Cellular Component: chloroplast stroma (GO:0009570);; Biological Process: plastid organization (GO:0009657);; Biological Process: photosynthetic electron transport in photosystem I (GO:0009773);; Cellular Component: chloroplast envelope (GO:0009941);; Biologi…	K05298|0.0|ath:AT3G26650|GAPA	[G]	Carbohydrate transport and metabolism	Glyceraldehyde 3-phosphate dehydrogenase, C-terminal domain;; Glyceraldehyde 3-phosphate dehydrogenase, NAD binding domain	Glyceraldehyde-3-phosphate dehydrogenase GAPA2, chloroplastic (Precursor) GN=GAPA2 OS=Arabidopsis thaliana (Mouse-ear cress) PE=1 SV=1	Glyceraldehyde-3-phosphate dehydrogenase {ECO:0000256|RuleBase:RU361160} OS=Brassica napus (Rape) PE=3 SV=1	BnaC08g40850D [Brassica napus]	PREDICTED: Brassica rapa glyceraldehyde-3-phosphate dehydrogenase GAPA2, chloroplastic (LOC103843097), transcript variant X1, mRNA
BnaC08g36570D	--	--	Molecular Function: actin binding (GO:0003779);; Cellular Component: cell wall (GO:0005618);; Cellular Component: nucleolus (GO:0005730);; Cellular Component: spindle (GO:0005819);; Cellular Component: cytosol (GO:0005829);; Cellular Component: plasma membrane (GO:0005886);; Biological Process: actin polymerization or depolymerization (GO:0008154);; Cellular Component: plasmodesma (GO:0009506);; …	--	[Z]	Cytoskeleton	Profilin	Profilin-1 GN=F6F22.21 OS=Arabidopsis thaliana (Mouse-ear cress) PE=1 SV=1	Profilin {ECO:0000256|RuleBase:RU003909} OS=Brassica rapa subsp. pekinensis (Chinese cabbage) PE=3 SV=1	PREDICTED: profilin-1-like [Brassica rapa]	PREDICTED: Brassica rapa profilin-1-like (LOC103842625), mRNA
BnaC08g36120D	--	--	Molecular Function: diacylglycerol kinase activity (GO:0004143);; Biological Process: protein kinase C-activating G-protein coupled receptor signaling pathway (GO:0007205);; Biological Process: response to ethylene (GO:0009723);; Biological Process: phosphorylation (GO:0016310);;	--	[IT]	--	Diacylglycerol kinase accessory domain;; Diacylglycerol kinase catalytic domain	Diacylglycerol kinase 5 GN=DGK5 OS=Arabidopsis thaliana (Mouse-ear cress) PE=2 SV=1	Diacylglycerol kinase {ECO:0000256|RuleBase:RU361128} OS=Brassica napus (Rape) PE=3 SV=1	BnaC08g36120D [Brassica napus]	PREDICTED: Brassica rapa diacylglycerol kinase 5 (LOC103842575), mRNA
BnaC08g41050D	--	--	Biological Process: mRNA splicing, via spliceosome (GO:0000398);; Cellular Component: nucleus (GO:0005634);; Biological Process: rRNA processing (GO:0006364);; Biological Process: protein maturation (GO:0051604);;	--	[S]	Function unknown	Domain of unknown function (DUF947)	--	BnaC08g41050D protein {ECO:0000313|EMBL:CDY16018.1} OS=Brassica napus (Rape) PE=4 SV=1	BnaC08g41050D [Brassica napus]	PREDICTED: Brassica rapa ribosomal RNA processing protein 36 homolog (LOC103843114), mRNA
BnaA09g44810D	--	--	Cellular Component: vacuole (GO:0005773);; Cellular Component: endoplasmic reticulum (GO:0005783);; Biological Process: signal transduction (GO:0007165);; Cellular Component: integral component of membrane (GO:0016021);; Molecular Function: phosphatidylinositol binding (GO:0035091);;	--	[R]	General function prediction only	Putative integral membrane protein conserved region (DUF2404)	--	BnaA09g44810D protein {ECO:0000313|EMBL:CDY21730.1} OS=Brassica napus (Rape) PE=4 SV=1	BnaA09g44810D [Brassica napus]	PREDICTED: Brassica rapa uncharacterized LOC103842732 (LOC103842732), mRNA
BnaC08g34590D	--	--	Cellular Component: ubiquitin ligase complex (GO:0000151);; Molecular Function: ubiquitin-protein ligase activity (GO:0004842);; Cellular Component: nucleus (GO:0005634);; Cellular Component: kinesin complex (GO:0005871);; Biological Process: protein ubiquitination (GO:0016567);; Molecular Function: kinesin binding (GO:0019894);;	--	[S]	Function unknown	Armadillo/beta-catenin-like repeat;; U-box domain;; HEAT repeats;; Armadillo-like	U-box domain-containing protein 4 GN=PUB4 OS=Arabidopsis thaliana (Mouse-ear cress) PE=1 SV=3	BnaC08g34590D protein {ECO:0000313|EMBL:CDX76873.1} OS=Brassica napus (Rape) PE=4 SV=1	BnaC08g34590D [Brassica napus]	PREDICTED: Brassica rapa U-box domain-containing protein 4 (LOC103842428), mRNA
BnaC08g37900D	--	--	Molecular Function: protein binding (GO:0005515);; Cellular Component: plasma membrane (GO:0005886);; Biological Process: syncytium formation (GO:0006949);; Cellular Component: integral component of membrane (GO:0016021);; Biological Process: response to karrikin (GO:0080167);;	--	--	--	Domain of unknown function (DUF588)	CASP-like protein 2A1 GN=At1g17200 OS=Arabidopsis thaliana (Mouse-ear cress) PE=2 SV=2	CASP-like protein {ECO:0000256|RuleBase:RU361233} OS=Brassica napus (Rape) PE=3 SV=1	BnaC08g37900D [Brassica napus]	Zea mays clone 13178 mRNA sequence
BnaA09g46040D	[D]	Cell cycle control, cell division, chromosome partitioning	Biological Process: petal formation (GO:0048451);; Biological Process: sepal formation (GO:0048453);; Biological Process: RNA-directed DNA methylation (GO:0080188);;	--	--	--	XH domain;; XS domain;; XS zinc finger domain	Factor of DNA methylation 4 {ECO:0000303|PubMed:22302148} OS=Arabidopsis thaliana (Mouse-ear cress) PE=4 SV=1	BnaA09g46040D protein {ECO:0000313|EMBL:CDY33798.1} OS=Brassica napus (Rape) PE=4 SV=1	BnaA09g46040D [Brassica napus]	PREDICTED: Brassica rapa uncharacterized LOC103843080 (LOC103843080), transcript variant X2, mRNA
BnaC08g37440D	[C]	Energy production and conversion	Cellular Component: cytoplasm (GO:0005737);; Biological Process: response to wounding (GO:0009611);; Biological Process: jasmonic acid biosynthetic process (GO:0009695);; Molecular Function: FMN binding (GO:0010181);; Molecular Function: 12-oxophytodienoate reductase activity (GO:0016629);; Biological Process: oxidation-reduction process (GO:0055114);;	K05894|0.0|ath:AT1G76690|OPR2	[CR]	--	NADH:flavin oxidoreductase / NADH oxidase family	12-oxophytodienoate reductase 2 GN=OPR2 OS=Arabidopsis thaliana (Mouse-ear cress) PE=1 SV=2	BnaC08g37440D protein {ECO:0000313|EMBL:CDX81857.1} OS=Brassica napus (Rape) PE=4 SV=1	BnaC08g37440D [Brassica napus]	PREDICTED: Brassica rapa putative 12-oxophytodienoate reductase-like protein 2A (LOC103842724), mRNA
BnaA09g48640D	[GEPR]	--	Molecular Function: sugar:hydrogen symporter activity (GO:0005351);; Cellular Component: endoplasmic reticulum (GO:0005783);; Cellular Component: plasma membrane (GO:0005886);; Biological Process: tryptophan catabolic process (GO:0006569);; Biological Process: response to water deprivation (GO:0009414);; Biological Process: systemic acquired resistance (GO:0009627);; Biological Process: response …	--	[R]	General function prediction only	Sugar (and other) transporter;; Major Facilitator Superfamily	Sugar transporter ERD6 GN=F7G19.19 OS=Arabidopsis thaliana (Mouse-ear cress) PE=1 SV=3	BnaA09g48640D protein {ECO:0000313|EMBL:CDY06339.1} OS=Brassica napus (Rape) PE=3 SV=1	PREDICTED: sugar transporter ERD6 [Brassica rapa]	PREDICTED: Brassica rapa sugar transporter ERD6 (LOC103843369), mRNA
BnaC08g37070D	--	--	Molecular Function: nucleic acid binding (GO:0003676);; Molecular Function: endonuclease activity (GO:0004519);; Cellular Component: chloroplast (GO:0009507);;	--	--	--	HNH endonuclease	--	BnaC08g37070D protein {ECO:0000313|EMBL:CDX81894.1} OS=Brassica napus (Rape) PE=4 SV=1	BnaC08g37070D [Brassica napus]	PREDICTED: Brassica rapa uncharacterized LOC103842690 (LOC103842690), mRNA
BnaA09g51080D	[O]	Posttranslational modification, protein turnover, chaperones	Biological Process: mitotic cell cycle (GO:0000278);; Cellular Component: condensed nuclear chromosome (GO:0000794);; Cellular Component: spindle (GO:0005819);; Cellular Component: cytosol (GO:0005829);; Biological Process: RNA processing (GO:0006396);; Biological Process: protein glycosylation (GO:0006486);; Biological Process: N-terminal protein myristoylation (GO:0006499);; Biological Process:…	--	[D]	Cell cycle control, cell division, chromosome partitioning	Cullin family;; Cullin protein neddylation domain	Cullin-1 GN=CUL1 OS=Arabidopsis thaliana (Mouse-ear cress) PE=1 SV=1	BnaA09g51080D protein {ECO:0000313|EMBL:CDY32488.1} OS=Brassica napus (Rape) PE=3 SV=1	BnaA09g51080D [Brassica napus]	PREDICTED: Brassica rapa cullin-1-like (LOC103843729), mRNA
BnaC08g40580D	--	--	Cellular Component: nuclear pore (GO:0005643);; Biological Process: mitotic recombination (GO:0006312);; Biological Process: embryo sac egg cell differentiation (GO:0009560);; Biological Process: embryo development ending in seed dormancy (GO:0009793);; Biological Process: poly(A)+ mRNA export from nucleus (GO:0016973);;	--	[A]	RNA processing and modification	GLE1-like protein	Protein GLE1 {ECO:0000303|PubMed:21189294} OS=Arabidopsis thaliana (Mouse-ear cress) PE=1 SV=1	BnaC08g40580D protein {ECO:0000313|EMBL:CDY16065.1} OS=Brassica napus (Rape) PE=4 SV=1	BnaC08g40580D [Brassica napus]	PREDICTED: Brassica rapa nucleoporin GLE1 (LOC103843077), transcript variant X1, mRNA
BnaA09g42680D	--	--	Molecular Function: nucleotide binding (GO:0000166);;	--	--	--	Arabidopsis broad-spectrum mildew resistance protein RPW8	Protein DA1-related 5 GN=DAR5 OS=Arabidopsis thaliana (Mouse-ear cress) PE=2 SV=2	BnaA09g42680D protein {ECO:0000313|EMBL:CDY13766.1} OS=Brassica napus (Rape) PE=4 SV=1	BnaA09g42680D [Brassica napus]	Arabidopsis thaliana chromosome 5 sequence
BnaA09g42180D	--	--	Cellular Component: cytoplasm (GO:0005737);; Cellular Component: plasma membrane (GO:0005886);; Biological Process: response to cold (GO:0009409);; Biological Process: response to water deprivation (GO:0009414);; Biological Process: response to abscisic acid (GO:0009737);;	--	--	--	Late embryogenesis abundant protein 18	--	BnaA09g42180D protein {ECO:0000313|EMBL:CDY49449.1} OS=Brassica napus (Rape) PE=4 SV=1	PREDICTED: uncharacterized protein LOC103842441 [Brassica rapa]	PREDICTED: Brassica rapa uncharacterized LOC103842441 (LOC103842441), mRNA
BnaC08g38140D	--	--	Cellular Component: extracellular region (GO:0005576);; Cellular Component: endoplasmic reticulum (GO:0005783);; Biological Process: response to salt stress (GO:0009651);;	--	--	--	--	--	BnaC08g38140D protein {ECO:0000313|EMBL:CDX81787.1} OS=Brassica napus (Rape) PE=4 SV=1	BnaC08g38140D [Brassica napus]	PREDICTED: Brassica rapa uncharacterized LOC103842825 (LOC103842825), mRNA
BnaC08g34390D	--	--	--	--	--	--	Domain of unknown function (DUF4228)	--	BnaC08g34390D protein {ECO:0000313|EMBL:CDX76853.1} OS=Brassica napus (Rape) PE=4 SV=1	BnaC08g34390D [Brassica napus]	PREDICTED: Brassica rapa uncharacterized LOC103842404 (LOC103842404), mRNA
BnaA09g44470D	[P]	Inorganic ion transport and metabolism	--	--	[A]	RNA processing and modification	Surp module	Probable splicing factor 3A subunit 1 GN=At1g14650 OS=Arabidopsis thaliana (Mouse-ear cress) PE=1 SV=2	BnaA09g44470D protein {ECO:0000313|EMBL:CDY21696.1} OS=Brassica napus (Rape) PE=4 SV=1	BnaA09g44470D [Brassica napus]	PREDICTED: Brassica rapa probable splicing factor 3A subunit 1 (LOC103842679), transcript variant X2, mRNA
BnaC08g34360D	--	--	Cellular Component: mitochondrion (GO:0005739);;	--	--	--	Transmembrane family 220, helix	--	BnaC08g34360D protein {ECO:0000313|EMBL:CDX76850.1} OS=Brassica napus (Rape) PE=4 SV=1	BnaC08g34360D [Brassica napus]	PREDICTED: Brassica rapa uncharacterized LOC103842403 (LOC103842403), mRNA
BnaC08g35220D	[R]	General function prediction only	Molecular Function: GTP binding (GO:0005525);; Cellular Component: mitochondrion (GO:0005739);; Cellular Component: Golgi apparatus (GO:0005794);; Biological Process: intra-Golgi vesicle-mediated transport (GO:0006891);; Biological Process: membrane fusion (GO:0006944);; Biological Process: small GTPase mediated signal transduction (GO:0007264);; Biological Process: plant-type cell wall modificat…	K07976|1e-121|ath:AT2G22290|ATRABH1D (ARABIDOPSIS RAB GTPASE HOMOLOG H1D)	[U]	Intracellular trafficking, secretion, and vesicular transport	Ras family;; Miro-like protein;; ADP-ribosylation factor family;; Elongation factor Tu GTP binding domain;; Gtr1/RagA G protein conserved region;; Signal recognition particle receptor beta subunit	Ras-related protein RABH1d GN=RABH1D OS=Arabidopsis thaliana (Mouse-ear cress) PE=3 SV=1	BnaC08g35220D protein {ECO:0000313|EMBL:CDX76936.1} OS=Brassica napus (Rape) PE=4 SV=1	BnaC08g35220D [Brassica napus]	PREDICTED: Brassica rapa ras-related protein RABH1d (LOC103837902), mRNA
BnaC08g36910D	--	--	Biological Process: response to oxidative stress (GO:0006979);; Biological Process: response to wounding (GO:0009611);; Biological Process: response to insect (GO:0009625);; Biological Process: systemic acquired resistance, salicylic acid mediated signaling pathway (GO:0009862);; Biological Process: response to chitin (GO:0010200);; Biological Process: endoplasmic reticulum unfolded protein respo…	--	[L]	Replication, recombination and repair	--	--	BnaC08g36910D protein {ECO:0000313|EMBL:CDX81910.1} OS=Brassica napus (Rape) PE=4 SV=1	BnaC08g36910D [Brassica napus]	PREDICTED: Brassica rapa uncharacterized LOC103842668 (LOC103842668), mRNA
BnaA09g50690D	--	--	Cellular Component: nucleus (GO:0005634);; Biological Process: embryo development ending in seed dormancy (GO:0009793);; Molecular Function: metal ion binding (GO:0046872);;	--	--	--	RNA polymerase I-specific transcription initiation factor Rrn7	TATA box-binding protein-associated factor RNA polymerase I subunit B GN=T17M13 OS=Arabidopsis thaliana (Mouse-ear cress) PE=1 SV=1	BnaA09g50690D protein {ECO:0000313|EMBL:CDY32527.1} OS=Brassica napus (Rape) PE=4 SV=1	BnaA09g50690D [Brassica napus]	PREDICTED: Brassica rapa TATA box-binding protein-associated factor RNA polymerase I subunit B (LOC103843672), mRNA
BnaC08g40880D	[H]	Coenzyme transport and metabolism	Cellular Component: nucleus (GO:0005634);; Biological Process: protein targeting to mitochondrion (GO:0006626);; Biological Process: embryo sac egg cell differentiation (GO:0009560);;	--	--	--	--	Histone deacetylase HDT2 GN=HDT2 OS=Zea mays (Maize) PE=1 SV=1	BnaC08g40880D protein {ECO:0000313|EMBL:CDY16035.1} OS=Brassica napus (Rape) PE=4 SV=1	BnaC08g40880D [Brassica napus]	PREDICTED: Brassica rapa histone H2A.Z-specific chaperone CHZ1-like (LOC103843102), mRNA
BnaA09g48050D	[L]	Replication, recombination and repair	Cellular Component: cytosol (GO:0005829);; Cellular Component: plasma membrane (GO:0005886);;	K07466|1e-88|ath:AT1G10590|DNA-binding protein-related	--	--	--	Uncharacterized protein At4g28440 GN=At4g28440 OS=Arabidopsis thaliana (Mouse-ear cress) PE=1 SV=1	BnaA09g48050D protein {ECO:0000313|EMBL:CDY34879.1} OS=Brassica napus (Rape) PE=4 SV=1	PREDICTED: uncharacterized protein At4g28440-like [Brassica rapa]	PREDICTED: Brassica rapa uncharacterized protein At4g28440-like (LOC103843288), mRNA
BnaC08g36400D	[J]	Translation, ribosomal structure and biogenesis	Cellular Component: cytosol (GO:0005829);; Cellular Component: plasma membrane (GO:0005886);; Molecular Function: translation factor activity, nucleic acid binding (GO:0008135);; Biological Process: cellular metabolic process (GO:0044237);; Biological Process: primary metabolic process (GO:0044238);; Biological Process: organic substance metabolic process (GO:0071704);;	K03243|7e-62|ath:AT1G76810|eukaryotic translation initiation factor 2 family protein / eIF-2 family protein	[J]	Translation, ribosomal structure and biogenesis	Elongation factor Tu domain 4;; Translation-initiation factor 2	--	BnaC08g36400D protein {ECO:0000313|EMBL:CDX81961.1} OS=Brassica napus (Rape) PE=4 SV=1	BnaC08g36400D [Brassica napus]	PREDICTED: Brassica rapa eukaryotic translation initiation factor 5B-like (LOC103842609), transcript variant X5, mRNA
BnaC08g44070D	[E]	Amino acid transport and metabolism	Molecular Function: G-protein coupled GABA receptor activity (GO:0004965);; Molecular Function: ionotropic glutamate receptor activity (GO:0004970);; Molecular Function: intracellular ligand-gated ion channel activity (GO:0005217);; Molecular Function: extracellular-glutamate-gated ion channel activity (GO:0005234);; Molecular Function: calcium channel activity (GO:0005262);; Molecular Function: …	K05387|0.0|ath:AT1G05200|ATGLR3.4	[PET]	--	Receptor family ligand binding region;; Ligand-gated ion channel;; Periplasmic binding protein;; Bacterial extracellular solute-binding proteins, family 3	Glutamate receptor 3.4 (Precursor) GN=YUP8H12.19 OS=Arabidopsis thaliana (Mouse-ear cress) PE=2 SV=2	Glutamate receptor {ECO:0000256|PIRNR:PIRNR037090} OS=Brassica napus (Rape) PE=3 SV=1	BnaC08g44070D [Brassica napus]	PREDICTED: Brassica rapa glutamate receptor 3.4-like (LOC103843622), transcript variant X2, mRNA
BnaA09g44310D	[K]	Transcription	Cellular Component: cytoplasmic mRNA processing body (GO:0000932);; Molecular Function: protein binding (GO:0005515);; Cellular Component: nucleus (GO:0005634);; Cellular Component: small nucleolar ribonucleoprotein complex (GO:0005732);; Biological Process: vegetative to reproductive phase transition of meristem (GO:0010228);; Biological Process: RNA metabolic process (GO:0016070);;	--	[A]	RNA processing and modification	LSM domain	Sm-like protein LSM1A {ECO:0000305} OS=Arabidopsis thaliana (Mouse-ear cress) PE=1 SV=1	BnaA09g44310D protein {ECO:0000313|EMBL:CDY21680.1} OS=Brassica napus (Rape) PE=4 SV=1	PREDICTED: probable U6 snRNA-associated Sm-like protein LSm1 [Brassica rapa]	PREDICTED: Brassica rapa probable U6 snRNA-associated Sm-like protein LSm1 (LOC103842663), mRNA
BnaA09g46530D	[RTKL]	--	Molecular Function: protein serine/threonine kinase activity (GO:0004674);; Molecular Function: protein tyrosine kinase activity (GO:0004713);; Molecular Function: ATP binding (GO:0005524);; Cellular Component: plasma membrane (GO:0005886);; Biological Process: protein phosphorylation (GO:0006468);; Molecular Function: carbohydrate binding (GO:0030246);; Biological Process: recognition of pollen …	--	--	--	Protein tyrosine kinase;; Protein kinase domain;; Carbohydrate-binding protein of the ER;; S-locus glycoprotein family;; PAN-like domain;; Di-glucose binding within endoplasmic reticulum;; Domain of unknown function (DUF3403);; Phosphotransferase enzyme family	G-type lectin S-receptor-like serine/threonine-protein kinase At1g11330 (Precursor) GN=At1g11330 OS=Arabidopsis thaliana (Mouse-ear cress) PE=2 SV=3	BnaA09g46530D protein {ECO:0000313|EMBL:CDY26624.1} OS=Brassica napus (Rape) PE=4 SV=1	BnaA09g46530D [Brassica napus]	PREDICTED: Brassica rapa receptor-like protein kinase FERONIA (LOC103843075), transcript variant X1, mRNA
BnaC08g34190D	[S]	Function unknown	Molecular Function: protein serine/threonine kinase activity (GO:0004674);; Molecular Function: ATP binding (GO:0005524);; Cellular Component: plasma membrane (GO:0005886);; Biological Process: protein phosphorylation (GO:0006468);; Biological Process: transmembrane receptor protein tyrosine kinase signaling pathway (GO:0007169);; Cellular Component: integral component of membrane (GO:0016021);;	--	--	--	Protein kinase domain;; Protein tyrosine kinase;; Leucine Rich repeats (2 copies);; Leucine Rich Repeat;; Leucine rich repeat;; Leucine Rich repeat;; Leucine rich repeat N-terminal domain	Putative leucine-rich repeat receptor-like serine/threonine-protein kinase At2g24130 (Precursor) GN=At2g24130 OS=Arabidopsis thaliana (Mouse-ear cress) PE=3 SV=1	BnaC08g34190D protein {ECO:0000313|EMBL:CDX76833.1} OS=Brassica napus (Rape) PE=4 SV=1	BnaC08g34190D [Brassica napus]	PREDICTED: Brassica rapa putative leucine-rich repeat receptor-like serine/threonine-protein kinase At2g24130 (LOC103842380), mRNA
BnaC08g39380D	--	--	Biological Process: cytokinesis (GO:0000910);; Cellular Component: nucleus (GO:0005634);; Cellular Component: mitochondrion (GO:0005739);; Biological Process: microtubule nucleation (GO:0007020);; Biological Process: cell-cell signaling (GO:0007267);; Biological Process: pattern specification process (GO:0007389);; Molecular Function: microtubule binding (GO:0008017);; Cellular Component: phragmo…	--	[DZ]	--	Microtubule associated protein (MAP65/ASE1 family)	65-kDa microtubule-associated protein 7 GN=MAP65-7 OS=Arabidopsis thaliana (Mouse-ear cress) PE=2 SV=1	BnaC08g39380D protein {ECO:0000313|EMBL:CDX81663.1} OS=Brassica napus (Rape) PE=4 SV=1	BnaC08g39380D [Brassica napus]	PREDICTED: Brassica rapa 65-kDa microtubule-associated protein 7 (LOC103842950), transcript variant X2, mRNA
BnaC08g41650D	--	--	Cellular Component: extracellular region (GO:0005576);;	--	--	--	Stigma-specific protein, Stig1	--	BnaC08g41650D protein {ECO:0000313|EMBL:CDY34606.1} OS=Brassica napus (Rape) PE=4 SV=1	BnaC08g41650D [Brassica napus]	PREDICTED: Brassica rapa uncharacterized LOC103843209 (LOC103843209), mRNA
BnaA09g48380D	[O]	Posttranslational modification, protein turnover, chaperones	Molecular Function: translation elongation factor activity (GO:0003746);; Molecular Function: copper ion binding (GO:0005507);; Cellular Component: cell wall (GO:0005618);; Cellular Component: vacuole (GO:0005773);; Cellular Component: cytosol (GO:0005829);; Cellular Component: eukaryotic translation elongation factor 1 complex (GO:0005853);; Cellular Component: plasma membrane (GO:0005886);; Bio…	K03233|0.0|ath:AT1G09640|elongation factor 1B-gamma, putative / eEF-1B gamma, putative	[O]	Posttranslational modification, protein turnover, chaperones	Elongation factor 1 gamma, conserved domain;; Glutathione S-transferase, N-terminal domain;; Glutathione S-transferase, C-terminal domain;; Glutathione S-transferase, N-terminal domain;; Glutathione S-transferase, N-terminal domain;; Glutathione S-transferase, C-terminal domain;; Glutathione S-transferase, C-terminal domain	Probable elongation factor 1-gamma 1 GN=At1g09640 OS=Arabidopsis thaliana (Mouse-ear cress) PE=2 SV=1	BnaA09g48380D protein {ECO:0000313|EMBL:CDY06365.1} OS=Brassica napus (Rape) PE=4 SV=1	BnaA09g48380D [Brassica napus]	PREDICTED: Brassica rapa probable elongation factor 1-gamma 1 (LOC103843341), mRNA
BnaC08g35860D	--	--	Cellular Component: mitochondrion (GO:0005739);;	--	--	--	--	30S ribosomal protein S31, mitochondrial (Precursor) GN=At2g21290 OS=Arabidopsis thaliana (Mouse-ear cress) PE=3 SV=1	BnaC08g35860D protein {ECO:0000313|EMBL:CDX82015.1} OS=Brassica napus (Rape) PE=4 SV=1	BnaC08g35860D [Brassica napus]	Brassica rapa subsp. pekinensis clone KBrB082F21, complete sequence
BnaC08g43170D	--	--	Molecular Function: calcium ion binding (GO:0005509);; Cellular Component: endoplasmic reticulum membrane (GO:0005789);; Biological Process: protein folding (GO:0006457);; Biological Process: cellular response to nitrogen starvation (GO:0006995);; Cellular Component: chloroplast (GO:0009507);; Biological Process: plant-type hypersensitive response (GO:0009626);; Biological Process: systemic acqui…	--	[O]	Posttranslational modification, protein turnover, chaperones	Calreticulin family	Calreticulin-3 (Precursor) GN=CRT3 OS=Arabidopsis thaliana (Mouse-ear cress) PE=1 SV=2	BnaC08g43170D protein {ECO:0000313|EMBL:CDY22683.1} OS=Brassica napus (Rape) PE=3 SV=1	BnaC08g43170D [Brassica napus]	PREDICTED: Brassica rapa calreticulin-3-like (LOC103843398), mRNA
BnaC08g44170D	--	--	Molecular Function: transferase activity, transferring glycosyl groups (GO:0016757);;	--	[G]	Carbohydrate transport and metabolism	Protein of unknown function, DUF604;; Fringe-like	--	BnaC08g44170D protein {ECO:0000313|EMBL:CDY10034.1} OS=Brassica napus (Rape) PE=4 SV=1	BnaC08g44170D [Brassica napus]	PREDICTED: Brassica rapa uncharacterized LOC103843612 (LOC103843612), transcript variant X1, mRNA
BnaC08g43780D	[P]	Inorganic ion transport and metabolism	Molecular Function: N,N-dimethylaniline monooxygenase activity (GO:0004499);; Biological Process: response to brassinosteroid (GO:0009741);; Biological Process: auxin biosynthetic process (GO:0009851);; Molecular Function: flavin adenine dinucleotide binding (GO:0050660);; Molecular Function: NADP binding (GO:0050661);; Biological Process: oxidation-reduction process (GO:0055114);;	--	[Q]	Secondary metabolites biosynthesis, transport and catabolism	Flavin-binding monooxygenase-like;; Pyridine nucleotide-disulphide oxidoreductase;; L-lysine 6-monooxygenase (NADPH-requiring);; Pyridine nucleotide-disulphide oxidoreductase;; FAD-NAD(P)-binding;; Pyridine nucleotide-disulphide oxidoreductase;; FAD binding domain;; NAD(P)-binding Rossmann-like domain;; Thi4 family	Probable indole-3-pyruvate monooxygenase YUCCA9 GN=F20D22.5 OS=Arabidopsis thaliana (Mouse-ear cress) PE=2 SV=1	Flavin-containing monooxygenase {ECO:0000256|RuleBase:RU361177} OS=Brassica napus (Rape) PE=3 SV=1	BnaC08g43780D [Brassica napus]	PREDICTED: Brassica rapa probable indole-3-pyruvate monooxygenase YUCCA9 (LOC103843665), mRNA
BnaA09g47120D	--	--	Cellular Component: mitochondrion (GO:0005739);;	--	[R]	General function prediction only	PPR repeat family;; PPR repeat;; PPR repeat;; Pentatricopeptide repeat domain;; Mitochondrial 28S ribosomal protein S27;; Tetratricopeptide repeat	Pentatricopeptide repeat-containing protein At1g12300, mitochondrial (Precursor) GN=At1g12300 OS=Arabidopsis thaliana (Mouse-ear cress) PE=2 SV=1	BnaA09g47120D protein {ECO:0000313|EMBL:CDY26565.1} OS=Brassica napus (Rape) PE=4 SV=1	BnaA09g47120D [Brassica napus]	PREDICTED: Brassica rapa pentatricopeptide repeat-containing protein At1g12620-like (LOC103843127), transcript variant X2, mRNA
BnaC08g35340D	--	--	--	--	--	--	--	--	BnaCnng73890D protein {ECO:0000313|EMBL:CDY71671.1} OS=Brassica napus (Rape) PE=4 SV=1	BnaCnng73890D [Brassica napus]	--
BnaA09g51320D	[O]	Posttranslational modification, protein turnover, chaperones	Molecular Function: copper ion binding (GO:0005507);; Cellular Component: chloroplast (GO:0009507);; Biological Process: methylglyoxal catabolic process to D-lactate (GO:0019243);;	K02258|1e-172|ath:AT1G02410|cytochrome c oxidase assembly protein CtaG / Cox11 family	[O]	Posttranslational modification, protein turnover, chaperones	Cytochrome c oxidase assembly protein CtaG/Cox11	Cytochrome c oxidase assembly protein COX11, mitochondrial (Precursor) GN=COX11 OS=Arabidopsis thaliana (Mouse-ear cress) PE=2 SV=1	BnaA09g51320D protein {ECO:0000313|EMBL:CDY32464.1} OS=Brassica napus (Rape) PE=3 SV=1	BnaA09g51320D [Brassica napus]	PREDICTED: Brassica rapa cytochrome c oxidase assembly protein COX11, mitochondrial-like (LOC103843752), mRNA
BnaC08g39870D	--	--	Cellular Component: nucleus (GO:0005634);; Cellular Component: cytoplasm (GO:0005737);; Molecular Function: oxidoreductase activity, acting on paired donors, with incorporation or reduction of molecular oxygen, 2-oxoglutarate as one donor, and incorporation of one atom each of oxygen into both donors (GO:0016706);; Biological Process: oxidation-reduction process (GO:0055114);;	--	[QR]	--	non-haem dioxygenase in morphine synthesis N-terminal;; 2OG-Fe(II) oxygenase superfamily	2-oxoglutarate-dependent dioxygenase DAO GN=OSJNBa0022H21.12 OS=Oryza sativa subsp. japonica (Rice) PE=2 SV=2	BnaC08g39870D protein {ECO:0000313|EMBL:CDX81614.1} OS=Brassica napus (Rape) PE=4 SV=1	BnaC08g39870D [Brassica napus]	PREDICTED: Brassica rapa 2-oxoglutarate-dependent dioxygenase DAO-like (LOC103842998), mRNA
BnaC08g38680D	--	--	Cellular Component: mitochondrion (GO:0005739);;	--	--	--	--	--	BnaC08g38680D protein {ECO:0000313|EMBL:CDX81733.1} OS=Brassica napus (Rape) PE=4 SV=1	BnaC08g38680D [Brassica napus]	PREDICTED: Brassica rapa uncharacterized LOC103842882 (LOC103842882), mRNA
BnaA09g48730D	--	--	Cellular Component: endoplasmic reticulum membrane (GO:0005789);; Cellular Component: plasma membrane (GO:0005886);; Biological Process: intracellular transport (GO:0046907);;	--	[U]	Intracellular trafficking, secretion, and vesicular transport	MSP (Major sperm protein) domain	Vesicle-associated protein 2-2, N-terminally processed GN=F22O13.31 OS=Arabidopsis thaliana (Mouse-ear cress) PE=1 SV=1	BnaA09g48730D protein {ECO:0000313|EMBL:CDY06330.1} OS=Brassica napus (Rape) PE=4 SV=1	BnaA09g48730D [Brassica napus]	PREDICTED: Brassica rapa vesicle-associated protein 2-2-like (LOC103843379), transcript variant X3, mRNA
BnaC08g35590D	--	--	Cellular Component: Golgi apparatus (GO:0005794);; Biological Process: transport (GO:0006810);; Molecular Function: phosphatidylinositol transporter activity (GO:0008526);; Biological Process: flower development (GO:0009908);;	--	[I]	Lipid transport and metabolism	--	Phosphatidylinositol/phosphatidylcholine transfer protein SFH3 GN=SFH3 OS=Arabidopsis thaliana (Mouse-ear cress) PE=2 SV=1	BnaC08g35590D protein {ECO:0000313|EMBL:CDX82042.1} OS=Brassica napus (Rape) PE=4 SV=1	BnaC08g35590D [Brassica napus]	PREDICTED: Brassica rapa phosphatidylinositol/phosphatidylcholine transfer protein SFH3-like (LOC103842516), mRNA
BnaA09g47390D	--	--	Molecular Function: Rho GDP-dissociation inhibitor activity (GO:0005094);; Cellular Component: cytoplasm (GO:0005737);; Biological Process: actin filament organization (GO:0007015);; Biological Process: plant-type cell wall modification (GO:0009827);; Biological Process: pollen tube growth (GO:0009860);;	--	[T]	Signal transduction mechanisms	RHO protein GDP dissociation inhibitor	Rho GDP-dissociation inhibitor 1 GN=GDI1 OS=Arabidopsis thaliana (Mouse-ear cress) PE=1 SV=1	BnaA09g47390D protein {ECO:0000313|EMBL:CDY26538.1} OS=Brassica napus (Rape) PE=4 SV=1	PREDICTED: rho GDP-dissociation inhibitor 1-like [Brassica rapa]	PREDICTED: Brassica rapa rho GDP-dissociation inhibitor 1-like (LOC103843157), mRNA
BnaC08g38160D	--	--	--	--	[R]	General function prediction only	--	Reticulon-like protein B22 GN=RTNLB22 OS=Arabidopsis thaliana (Mouse-ear cress) PE=2 SV=1	BnaC08g38160D protein {ECO:0000313|EMBL:CDX81785.1} OS=Brassica napus (Rape) PE=4 SV=1	BnaC08g38160D [Brassica napus]	PREDICTED: Brassica rapa reticulon-like protein B22 (LOC103842831), mRNA
BnaC08g37740D	--	--	Cellular Component: nucleus (GO:0005634);; Biological Process: photoperiodism (GO:0009648);;	--	--	--	Protein of unknown function (DUF1313)	Protein ELF4-LIKE 4 OS=Arabidopsis thaliana (Mouse-ear cress) PE=2 SV=1	BnaC08g37740D protein {ECO:0000313|EMBL:CDX81827.1} OS=Brassica napus (Rape) PE=4 SV=1	BnaC08g37740D [Brassica napus]	PREDICTED: Brassica rapa protein ELF4-LIKE 4-like (LOC103842749), mRNA
BnaC08g40400D	[U]	Intracellular trafficking, secretion, and vesicular transport	Molecular Function: DNA binding (GO:0003677);; Cellular Component: nucleus (GO:0005634);; Cellular Component: Golgi apparatus (GO:0005794);; Cellular Component: cytosol (GO:0005829);; Biological Process: glucose catabolic process (GO:0006007);; Molecular Function: ARF GTPase activator activity (GO:0008060);; Molecular Function: zinc ion binding (GO:0008270);; Biological Process: cellulose biosynt…	--	[TUZ]	--	--	ADP-ribosylation factor GTPase-activating protein AGD7 GN=F13M22.5 OS=Arabidopsis thaliana (Mouse-ear cress) PE=1 SV=1	BnaC08g40400D protein {ECO:0000313|EMBL:CDY16083.1} OS=Brassica napus (Rape) PE=4 SV=1	BnaC08g40400D [Brassica napus]	PREDICTED: Brassica rapa ADP-ribosylation factor GTPase-activating protein AGD7-like (LOC103857718), transcript variant X4, mRNA
BnaA09g46030D	--	--	--	--	[R]	General function prediction only	PPR repeat family;; PPR repeat;; PPR repeat;; Pentatricopeptide repeat domain	Pentatricopeptide repeat-containing protein At1g12300, mitochondrial (Precursor) GN=At1g12300 OS=Arabidopsis thaliana (Mouse-ear cress) PE=2 SV=1	BnaA09g46030D protein {ECO:0000313|EMBL:CDY33797.1} OS=Brassica napus (Rape) PE=4 SV=1	BnaA09g46030D [Brassica napus]	PREDICTED: Brassica rapa pentatricopeptide repeat-containing protein At3g22470, mitochondrial-like (LOC103843027), mRNA
BnaA09g46670D	[O]	Posttranslational modification, protein turnover, chaperones	Molecular Function: threonine-type endopeptidase activity (GO:0004298);; Cellular Component: nucleus (GO:0005634);; Cellular Component: cytoplasm (GO:0005737);; Cellular Component: proteasome core complex (GO:0005839);; Biological Process: ubiquitin-dependent protein catabolic process (GO:0006511);;	K02737|0.0|ath:AT3G26340|20S proteasome beta subunit E, putative	[O]	Posttranslational modification, protein turnover, chaperones	Proteasome subunit	Proteasome subunit beta type-5-B (Precursor) GN=PBE2 OS=Arabidopsis thaliana (Mouse-ear cress) PE=1 SV=1	Proteasome subunit beta type {ECO:0000256|RuleBase:RU004203} OS=Brassica napus (Rape) PE=3 SV=1	BnaA09g46670D [Brassica napus]	PREDICTED: Brassica rapa proteasome subunit beta type-5-B-like (LOC103843086), mRNA
BnaC08g43650D	--	--	Cellular Component: nucleus (GO:0005634);;	--	--	--	--	--	BnaC08g43650D protein {ECO:0000313|EMBL:CDY10086.1} OS=Brassica napus (Rape) PE=4 SV=1	BnaC08g43650D [Brassica napus]	PREDICTED: Brassica rapa uncharacterized LOC103843676 (LOC103843676), mRNA
BnaA09g50600D	--	--	Molecular Function: sequence-specific DNA binding transcription factor activity (GO:0003700);; Cellular Component: nucleus (GO:0005634);; Biological Process: regulation of transcription, DNA-templated (GO:0006355);; Biological Process: auxin-activated signaling pathway (GO:0009734);; Biological Process: response to brassinosteroid (GO:0009741);; Molecular Function: protein dimerization activity (…	K14484|1e-113|ath:AT1G04240|SHY2	--	--	AUX/IAA family	Auxin-responsive protein IAA3 GN=F19P19.32 OS=Arabidopsis thaliana (Mouse-ear cress) PE=1 SV=1	Auxin-responsive protein {ECO:0000256|RuleBase:RU004549} OS=Brassica napus (Rape) PE=3 SV=1	BnaA09g50600D [Brassica napus]	PREDICTED: Brassica rapa auxin-responsive protein IAA3 (LOC103843664), mRNA
BnaA09g49140D	[J]	Translation, ribosomal structure and biogenesis	Molecular Function: translation elongation factor activity (GO:0003746);; Molecular Function: GTPase activity (GO:0003924);; Molecular Function: calmodulin binding (GO:0005516);; Molecular Function: GTP binding (GO:0005525);; Cellular Component: nucleolus (GO:0005730);; Cellular Component: mitochondrion (GO:0005739);; Cellular Component: vacuolar membrane (GO:0005774);; Cellular Component: Golgi …	--	[J]	Translation, ribosomal structure and biogenesis	Elongation factor Tu GTP binding domain;; 50S ribosome-binding GTPase;; Signal recognition particle receptor beta subunit	Elongation factor 1-alpha 4 GN=A4 OS=Arabidopsis thaliana (Mouse-ear cress) PE=1 SV=2	BnaA09g49140D protein {ECO:0000313|EMBL:CDY06289.1} OS=Brassica napus (Rape) PE=4 SV=1	BnaA09g49140D [Brassica napus]	PREDICTED: Brassica rapa elongation factor 1-alpha 1-like (LOC103843422), misc_RNA
BnaA09g47050D	[CHR]	--	Cellular Component: cytoplasm (GO:0005737);; Biological Process: photorespiration (GO:0009853);; Molecular Function: hydroxypyruvate reductase activity (GO:0016618);; Molecular Function: glyoxylate reductase (NADP) activity (GO:0030267);; Molecular Function: NAD binding (GO:0051287);; Biological Process: oxidation-reduction process (GO:0055114);;	--	[C]	Energy production and conversion	D-isomer specific 2-hydroxyacid dehydrogenase, NAD binding domain;; D-isomer specific 2-hydroxyacid dehydrogenase, catalytic domain	Glyoxylate/hydroxypyruvate reductase HPR3 GN=HPR3 OS=Arabidopsis thaliana (Mouse-ear cress) PE=2 SV=1	BnaA09g47050D protein {ECO:0000313|EMBL:CDY26572.1} OS=Brassica napus (Rape) PE=3 SV=1	BnaA09g47050D [Brassica napus]	PREDICTED: Brassica rapa glyoxylate/hydroxypyruvate reductase HPR3-like (LOC103843120), mRNA
BnaC08g36790D	--	--	--	--	--	--	Thaumatin family	Pathogenesis-related protein 5 (Precursor) GN=At1g75040 OS=Arabidopsis thaliana (Mouse-ear cress) PE=1 SV=1	BnaC08g36790D protein {ECO:0000313|EMBL:CDX81922.1} OS=Brassica napus (Rape) PE=4 SV=1	BnaC08g36790D [Brassica napus]	PREDICTED: Brassica rapa pathogenesis-related protein 5-like (LOC103842652), transcript variant X2, mRNA
BnaC08g40010D	--	--	Molecular Function: sequence-specific DNA binding transcription factor activity (GO:0003700);; Cellular Component: nucleus (GO:0005634);; Biological Process: regulation of transcription, DNA-templated (GO:0006355);; Molecular Function: sequence-specific DNA binding (GO:0043565);;	--	--	--	WRKY DNA -binding domain	Probable WRKY transcription factor 4 GN=WRKY4 OS=Arabidopsis thaliana (Mouse-ear cress) PE=1 SV=2	BnaC08g40010D protein {ECO:0000313|EMBL:CDY16122.1} OS=Brassica napus (Rape) PE=4 SV=1	BnaC08g40010D [Brassica napus]	Brassica oleracea var. capitata WRKY transcription factor (WRKY94) mRNA, complete cds
BnaA09g50660D	--	--	--	--	--	--	Plant phosphoribosyltransferase C-terminal;; C2 domain	C2 and GRAM domain-containing protein At1g03370 GN=At1g03370 OS=Arabidopsis thaliana (Mouse-ear cress) PE=2 SV=4	BnaA09g50660D protein {ECO:0000313|EMBL:CDY32530.1} OS=Brassica napus (Rape) PE=4 SV=1	BnaA09g50660D [Brassica napus]	PREDICTED: Brassica rapa multiple C2 and transmembrane domain-containing protein 1 (LOC103843669), mRNA
BnaA09g50260D	--	--	--	--	--	--	Domain of unknown function (DUF313)	B3 domain-containing protein At2g24670 GN=At2g24670 OS=Arabidopsis thaliana (Mouse-ear cress) PE=2 SV=1	BnaA09g50260D protein {ECO:0000313|EMBL:CDY06177.1} OS=Brassica napus (Rape) PE=4 SV=1	BnaA09g50260D [Brassica napus]	PREDICTED: Brassica rapa B3 domain-containing protein At2g31720-like (LOC103843840), mRNA
BnaA09g46070D	--	--	--	--	--	--	--	--	BnaA09g46070D protein {ECO:0000313|EMBL:CDY33801.1} OS=Brassica napus (Rape) PE=4 SV=1	BnaA09g46070D [Brassica napus]	PREDICTED: Brassica rapa uncharacterized LOC103843032 (LOC103843032), transcript variant X1, ncRNA
BnaA09g46950D	--	--	--	--	[R]	General function prediction only	PPR repeat family;; PPR repeat;; PPR repeat;; Pentatricopeptide repeat domain	Pentatricopeptide repeat-containing protein At1g12620 GN=At1g12620 OS=Arabidopsis thaliana (Mouse-ear cress) PE=2 SV=1	BnaA09g46950D protein {ECO:0000313|EMBL:CDY26582.1} OS=Brassica napus (Rape) PE=4 SV=1	BnaA09g46950D [Brassica napus]	PREDICTED: Brassica rapa pentatricopeptide repeat-containing protein At1g12300, mitochondrial-like (LOC103843108), transcript variant X2, mRNA
BnaC08g35880D	--	--	Cellular Component: cytosol (GO:0005829);; Biological Process: ubiquitin-dependent protein catabolic process (GO:0006511);; Cellular Component: chloroplast (GO:0009507);;	K14016|0.0|ath:AT2G21270|ubiquitin fusion degradation UFD1 family protein	[O]	Posttranslational modification, protein turnover, chaperones	Ubiquitin fusion degradation protein UFD1	--	BnaC08g35880D protein {ECO:0000313|EMBL:CDX82013.1} OS=Brassica napus (Rape) PE=4 SV=1	BnaC08g35880D [Brassica napus]	PREDICTED: Brassica rapa ubiquitin fusion degradation protein 1 homolog (LOC103842542), transcript variant X1, mRNA
BnaC08g39490D	--	--	--	--	[O]	Posttranslational modification, protein turnover, chaperones	--	--	BnaC08g39490D protein {ECO:0000313|EMBL:CDX81652.1} OS=Brassica napus (Rape) PE=4 SV=1	BnaC08g39490D [Brassica napus]	Eutrema salsugineum hypothetical protein (EUTSA_v10007578mg) mRNA, complete cds
BnaA09g41780D	[Q]	Secondary metabolites biosynthesis, transport and catabolism	Cellular Component: endoplasmic reticulum (GO:0005783);; Biological Process: phenylpropanoid biosynthetic process (GO:0009699);; Biological Process: polyketide biosynthetic process (GO:0030639);; Biological Process: sporopollenin biosynthetic process (GO:0080110);; Molecular Function: tetraketide alpha-pyrone synthase activity (GO:0090439);;	--	--	--	Chalcone and stilbene synthases, N-terminal domain;; Chalcone and stilbene synthases, C-terminal domain;; 3-Oxoacyl-[acyl-carrier-protein (ACP)] synthase III;; 3-Oxoacyl-[acyl-carrier-protein (ACP)] synthase III C terminal	Chalcone synthase E GN=CHSE OS=Ipomoea purpurea (Common morning glory) PE=2 SV=1	BnaA09g41780D protein {ECO:0000313|EMBL:CDY34811.1} OS=Brassica napus (Rape) PE=3 SV=1	BnaA09g41780D [Brassica napus]	PREDICTED: Brassica rapa chalcone synthase-like (LOC103833867), mRNA
BnaA09g44030D	--	--	Molecular Function: structural constituent of ribosome (GO:0003735);; Cellular Component: cell wall (GO:0005618);; Cellular Component: plasma membrane (GO:0005886);; Biological Process: translation (GO:0006412);; Cellular Component: plasmodesma (GO:0009506);; Cellular Component: chloroplast (GO:0009507);; Cellular Component: cytosolic large ribosomal subunit (GO:0022625);; Biological Process: rib…	K02903|9e-90|ath:AT2G19730|60S ribosomal protein L28 (RPL28A)	[J]	Translation, ribosomal structure and biogenesis	Ribosomal L28e protein family	60S ribosomal protein L28-1 GN=RPL28A OS=Arabidopsis thaliana (Mouse-ear cress) PE=2 SV=1	BnaA09g44030D protein {ECO:0000313|EMBL:CDY21652.1} OS=Brassica napus (Rape) PE=4 SV=1	BnaA09g44030D [Brassica napus]	PREDICTED: Brassica rapa 60S ribosomal protein L28-1 (LOC103842629), mRNA
BnaA09g48270D	--	--	Molecular Function: sequence-specific DNA binding transcription factor activity (GO:0003700);; Cellular Component: nucleus (GO:0005634);; Biological Process: regulation of transcription, DNA-templated (GO:0006355);; Biological Process: autophagy (GO:0006914);; Molecular Function: zinc ion binding (GO:0008270);; Biological Process: response to symbiotic fungus (GO:0009610);; Biological Process: re…	--	[K]	Transcription	NF-X1 type zinc finger	NF-X1-type zinc finger protein NFXL1 GN=NFXL1 OS=Arabidopsis thaliana (Mouse-ear cress) PE=2 SV=1	BnaA09g48270D protein {ECO:0000313|EMBL:CDY34901.1} OS=Brassica napus (Rape) PE=4 SV=1	BnaA09g48270D [Brassica napus]	PREDICTED: Brassica rapa NF-X1-type zinc finger protein NFXL1-like (LOC103871791), mRNA
BnaA09g50140D	[L]	Replication, recombination and repair	Cellular Component: nucleus (GO:0005634);; Biological Process: chromatin silencing (GO:0006342);; Biological Process: regulation of flower development (GO:0009909);; Biological Process: histone H3-K9 methylation (GO:0051567);;	--	--	--	HRDC domain	ATP-dependent DNA helicase Q-like 4A GN=At1g10930 OS=Arabidopsis thaliana (Mouse-ear cress) PE=2 SV=1	BnaA09g50140D protein {ECO:0000313|EMBL:CDY06189.1} OS=Brassica napus (Rape) PE=4 SV=1	BnaA09g50140D [Brassica napus]	PREDICTED: Brassica rapa uncharacterized LOC103843579 (LOC103843579), mRNA
BnaC08g38090D	--	--	--	--	--	--	--	--	BnaC08g38090D protein {ECO:0000313|EMBL:CDX81792.1} OS=Brassica napus (Rape) PE=4 SV=1	BnaC08g38090D [Brassica napus]	PREDICTED: Brassica rapa uncharacterized LOC103842819 (LOC103842819), mRNA
BnaA09g45280D	--	--	Cellular Component: nucleus (GO:0005634);;	--	--	--	Protein of unknown function (DUF789)	--	BnaA09g45280D protein {ECO:0000313|EMBL:CDY33722.1} OS=Brassica napus (Rape) PE=4 SV=1	BnaA09g45280D [Brassica napus]	PREDICTED: Brassica rapa uncharacterized LOC103842923 (LOC103842923), transcript variant X2, mRNA
BnaA09g49730D	--	--	Cellular Component: cytoplasm (GO:0005737);; Molecular Function: electron carrier activity (GO:0009055);; Molecular Function: protein disulfide oxidoreductase activity (GO:0015035);; Biological Process: cell redox homeostasis (GO:0045454);; Biological Process: anther development (GO:0048653);;	--	[O]	Posttranslational modification, protein turnover, chaperones	Glutaredoxin	Monothiol glutaredoxin-S11 OS=Arabidopsis thaliana (Mouse-ear cress) PE=3 SV=1	Uncharacterized protein {ECO:0000313|EnsemblPlants:Bra031540.1-P} OS=Brassica rapa subsp. pekinensis (Chinese cabbage) PE=4 SV=1	PREDICTED: monothiol glutaredoxin-S11-like [Brassica rapa]	PREDICTED: Brassica rapa monothiol glutaredoxin-S11-like (LOC103843492), mRNA
BnaC08g43860D	--	--	Cellular Component: nucleus (GO:0005634);; Cellular Component: plasma membrane (GO:0005886);; Biological Process: gravitropism (GO:0009630);;	--	--	--	--	MATH domain-containing protein At5g43560 GN=At5g43560 OS=Arabidopsis thaliana (Mouse-ear cress) PE=1 SV=1	BnaC08g43860D protein {ECO:0000313|EMBL:CDY10065.1} OS=Brassica napus (Rape) PE=4 SV=1	BnaC08g43860D [Brassica napus]	PREDICTED: Brassica rapa MATH domain-containing protein At5g43560-like (LOC103843660), transcript variant X2, mRNA
BnaA09g43310D	--	--	--	--	--	--	--	--	--	--	PREDICTED: Brassica rapa probable transcription factor PosF21 (LOC103842547), mRNA
BnaC08g39910D	--	--	Cellular Component: Golgi apparatus (GO:0005794);; Molecular Function: galactoside 2-alpha-L-fucosyltransferase activity (GO:0008107);; Cellular Component: membrane (GO:0016020);; Biological Process: fucosylation (GO:0036065);; Biological Process: cell wall biogenesis (GO:0042546);;	K13681|0.0|ath:AT1G14080|FUT6	--	--	Xyloglucan fucosyltransferase	Fucosyltransferase 6 GN=FUT6 OS=Arabidopsis thaliana (Mouse-ear cress) PE=2 SV=1	BnaC08g39910D protein {ECO:0000313|EMBL:CDX81610.1} OS=Brassica napus (Rape) PE=4 SV=1	BnaC08g39910D [Brassica napus]	PREDICTED: Brassica rapa fucosyltransferase 6-like (LOC103843001), mRNA
BnaC08g34520D	[Q]	Secondary metabolites biosynthesis, transport and catabolism	Biological Process: defense response to insect (GO:0002213);; Molecular Function: monooxygenase activity (GO:0004497);; Molecular Function: iron ion binding (GO:0005506);; Cellular Component: mitochondrion (GO:0005739);; Molecular Function: electron carrier activity (GO:0009055);; Biological Process: toxin catabolic process (GO:0009407);; Biological Process: response to cyclopentenone (GO:0010583…	--	[Q]	Secondary metabolites biosynthesis, transport and catabolism	Cytochrome P450	Cytochrome P450 81D11 GN=CYP81D11 OS=Arabidopsis thaliana (Mouse-ear cress) PE=2 SV=1	BnaC08g34520D protein {ECO:0000313|EMBL:CDX76866.1} OS=Brassica napus (Rape) PE=3 SV=1	BnaC08g34520D [Brassica napus]	PREDICTED: Brassica rapa cytochrome P450 81D11 (LOC103842423), mRNA
BnaA09g45780D	--	--	Molecular Function: transporter activity (GO:0005215);; Cellular Component: mitochondrial inner membrane (GO:0005743);; Biological Process: mitochondrial transport (GO:0006839);; Cellular Component: integral component of membrane (GO:0016021);; Biological Process: transmembrane transport (GO:0055085);;	--	[C]	Energy production and conversion	Mitochondrial carrier protein	Mitochondrial uncoupling protein 3 GN=F7A19.22 OS=Arabidopsis thaliana (Mouse-ear cress) PE=2 SV=1	BnaA09g45780D protein {ECO:0000313|EMBL:CDY33772.1} OS=Brassica napus (Rape) PE=3 SV=1	PREDICTED: mitochondrial uncoupling protein 3 [Brassica rapa]	PREDICTED: Brassica rapa mitochondrial uncoupling protein 3 (LOC103842997), mRNA
BnaC08g43510D	[RTKL]	--	Molecular Function: protein serine/threonine kinase activity (GO:0004674);; Molecular Function: protein tyrosine kinase activity (GO:0004713);; Molecular Function: ATP binding (GO:0005524);; Cellular Component: nucleus (GO:0005634);; Cellular Component: plasma membrane (GO:0005886);; Biological Process: protein phosphorylation (GO:0006468);;	--	[T]	Signal transduction mechanisms	Protein kinase domain;; Protein tyrosine kinase	Probable serine/threonine-protein kinase RLCKVII GN=At1g07870 OS=Arabidopsis thaliana (Mouse-ear cress) PE=2 SV=1	BnaC08g43510D protein {ECO:0000313|EMBL:CDY22717.1} OS=Brassica napus (Rape) PE=4 SV=1	BnaC08g43510D [Brassica napus]	PREDICTED: Brassica rapa probable serine/threonine-protein kinase RLCKVII (LOC103843433), mRNA
BnaC08g44100D	[K]	Transcription	Molecular Function: sequence-specific DNA binding transcription factor activity (GO:0003700);; Cellular Component: nucleus (GO:0005634);; Biological Process: regulation of transcription, DNA-templated (GO:0006355);; Biological Process: trichome morphogenesis (GO:0010090);; Biological Process: stomatal complex morphogenesis (GO:0010103);; Molecular Function: sequence-specific DNA binding (GO:00435…	--	--	--	START domain;; Homeobox domain	Homeobox-leucine zipper protein HDG2 GN=YUP8H12.16 OS=Arabidopsis thaliana (Mouse-ear cress) PE=2 SV=1	BnaC08g44100D protein {ECO:0000313|EMBL:CDY10041.1} OS=Brassica napus (Rape) PE=4 SV=1	BnaC08g44100D [Brassica napus]	PREDICTED: Brassica rapa homeobox-leucine zipper protein HDG2 (LOC103843620), transcript variant X5, mRNA
BnaC08g43840D	[J]	Translation, ribosomal structure and biogenesis	Cellular Component: plastid small ribosomal subunit (GO:0000312);; Biological Process: RNA methylation (GO:0001510);; Molecular Function: RNA binding (GO:0003723);; Molecular Function: structural constituent of ribosome (GO:0003735);; Cellular Component: nucleolus (GO:0005730);; Cellular Component: vacuolar membrane (GO:0005774);; Cellular Component: Golgi apparatus (GO:0005794);; Cellular Compon…	--	[J]	Translation, ribosomal structure and biogenesis	Ribosomal protein S19	40S ribosomal protein S15-1 GN=F19P19.29 OS=Arabidopsis thaliana (Mouse-ear cress) PE=2 SV=1	BnaC08g43840D protein {ECO:0000313|EMBL:CDY10067.1} OS=Brassica napus (Rape) PE=3 SV=1	BnaA09g50580D [Brassica napus]	PREDICTED: Brassica rapa 40S ribosomal protein S15-1 (LOC103843661), mRNA
BnaA09g44580D	--	--	--	--	[Z]	Cytoskeleton	--	Actin-related protein 4 GN=ARP4 OS=Arabidopsis thaliana (Mouse-ear cress) PE=1 SV=1	BnaA09g44580D protein {ECO:0000313|EMBL:CDY21707.1} OS=Brassica napus (Rape) PE=4 SV=1	BnaA09g44580D [Brassica napus]	PREDICTED: Brassica rapa uncharacterized LOC103842702 (LOC103842702), transcript variant X2, ncRNA
BnaA09g42650D	--	--	Molecular Function: peroxidase activity (GO:0004601);; Cellular Component: extracellular region (GO:0005576);; Cellular Component: cytosol (GO:0005829);; Biological Process: response to oxidative stress (GO:0006979);; Biological Process: determination of bilateral symmetry (GO:0009855);; Biological Process: polarity specification of adaxial/abaxial axis (GO:0009944);; Biological Process: meristem…	K00430|0.0|ath:AT2G22420|peroxidase 17 (PER17) (P17)	--	--	Peroxidase	Peroxidase 17 (Precursor) GN=F14M13.18 OS=Arabidopsis thaliana (Mouse-ear cress) PE=2 SV=1	BnaA09g42650D protein {ECO:0000313|EMBL:CDY13763.1} OS=Brassica napus (Rape) PE=3 SV=1	BnaA09g42650D [Brassica napus]	PREDICTED: Brassica rapa peroxidase 17-like (LOC103837896), mRNA
BnaC08g36750D	--	--	Cellular Component: endosome (GO:0005768);; Cellular Component: Golgi apparatus (GO:0005794);; Cellular Component: trans-Golgi network (GO:0005802);; Biological Process: response to sucrose (GO:0009744);; Biological Process: response to glucose (GO:0009749);; Biological Process: response to fructose (GO:0009750);; Biological Process: root hair cell development (GO:0080147);;	--	--	--	Nucleotide-diphospho-sugar transferase	--	BnaC08g36750D protein {ECO:0000313|EMBL:CDX81926.1} OS=Brassica napus (Rape) PE=4 SV=1	BnaC08g36750D [Brassica napus]	PREDICTED: Brassica rapa UDP-D-xylose:L-fucose alpha-1,3-D-xylosyltransferase 1 (LOC103872734), mRNA
BnaC08g36960D	[N]	Cell motility	Cellular Component: ESCRT III complex (GO:0000815);; Cellular Component: nucleus (GO:0005634);; Biological Process: protein targeting to vacuole (GO:0006623);; Biological Process: vesicle-mediated transport (GO:0016192);;	K12193|3e-47|ath:AT5G22950|VPS24.1	[U]	Intracellular trafficking, secretion, and vesicular transport	Snf7	Vacuolar protein sorting-associated protein 24 homolog 1 GN=MRN17.18 OS=Arabidopsis thaliana (Mouse-ear cress) PE=1 SV=1	BnaC08g36960D protein {ECO:0000313|EMBL:CDX81905.1} OS=Brassica napus (Rape) PE=4 SV=1	BnaC08g36960D [Brassica napus]	PREDICTED: Brassica rapa vacuolar protein sorting-associated protein 24 homolog 1-like (LOC103845498), transcript variant X3, mRNA
BnaC08g40900D	--	--	Cellular Component: mitochondrion (GO:0005739);;	--	[R]	General function prediction only	PPR repeat family;; PPR repeat;; PPR repeat;; Pentatricopeptide repeat domain	Pentatricopeptide repeat-containing protein At1g12620 GN=At1g12620 OS=Arabidopsis thaliana (Mouse-ear cress) PE=2 SV=1	BnaC08g40900D protein {ECO:0000313|EMBL:CDY16033.1} OS=Brassica napus (Rape) PE=4 SV=1	BnaC08g40900D [Brassica napus]	PREDICTED: Brassica rapa pentatricopeptide repeat-containing protein At3g22470, mitochondrial-like (LOC103843103), mRNA
BnaC08g36870D	[R]	General function prediction only	Cellular Component: extracellular region (GO:0005576);; Cellular Component: plasma membrane (GO:0005886);; Biological Process: cytokinin metabolic process (GO:0009690);;	--	--	--	von Willebrand factor type A domain;; von Willebrand factor type A domain;; von Willebrand factor type A domain	--	BnaC08g36870D protein {ECO:0000313|EMBL:CDX81914.1} OS=Brassica napus (Rape) PE=4 SV=1	BnaC08g36870D [Brassica napus]	PREDICTED: Brassica rapa uncharacterized LOC103842665 (LOC103842665), mRNA
BnaC08g40080D	--	--	--	--	--	--	X8 domain	PLASMODESMATA CALLOSE-BINDING PROTEIN 1 (Precursor) GN=PDCB1 OS=Arabidopsis thaliana (Mouse-ear cress) PE=1 SV=1	BnaC08g40080D protein {ECO:0000313|EMBL:CDY16115.1} OS=Brassica napus (Rape) PE=4 SV=1	BnaC08g40080D [Brassica napus]	PREDICTED: Brassica rapa PLASMODESMATA CALLOSE-BINDING PROTEIN 1-like (LOC103843023), mRNA
BnaC08g39630D	--	--	Molecular Function: DNA binding (GO:0003677);; Molecular Function: sequence-specific DNA binding transcription factor activity (GO:0003700);; Cellular Component: nucleus (GO:0005634);; Biological Process: positive regulation of transcription, DNA-templated (GO:0045893);;	--	--	--	ZF-HD protein dimerisation region	Zinc-finger homeodomain protein 4 GN=F14L17.21 OS=Arabidopsis thaliana (Mouse-ear cress) PE=1 SV=1	BnaC08g39630D protein {ECO:0000313|EMBL:CDX81638.1} OS=Brassica napus (Rape) PE=4 SV=1	BnaC08g39630D [Brassica napus]	PREDICTED: Brassica rapa zinc-finger homeodomain protein 4-like (LOC103842967), transcript variant X2, mRNA
BnaC08g38300D	[R]	General function prediction only	Molecular Function: nucleotide binding (GO:0000166);; Biological Process: mRNA splicing, via spliceosome (GO:0000398);; Molecular Function: RNA binding (GO:0003723);; Molecular Function: protein binding (GO:0005515);; Cellular Component: nucleolus (GO:0005730);; Biological Process: sugar mediated signaling pathway (GO:0010182);; Cellular Component: nuclear speck (GO:0016607);;	K14325|0.0|ath:AT1G16610|SR45	[R]	General function prediction only	RNA recognition motif. (a.k.a. RRM, RBD, or RNP domain);; RNA recognition motif (a.k.a. RRM, RBD, or RNP domain);; RNA recognition motif. (a.k.a. RRM, RBD, or RNP domain)	Serine/arginine-rich splicing factor SR45 GN=F19K19.9 OS=Arabidopsis thaliana (Mouse-ear cress) PE=1 SV=1	BnaC08g38300D protein {ECO:0000313|EMBL:CDX81771.1} OS=Brassica napus (Rape) PE=4 SV=1	BnaC08g38300D [Brassica napus]	PREDICTED: Brassica rapa serine/arginine-rich splicing factor SR45-like (LOC103842841), mRNA
BnaA09g49900D	[R]	General function prediction only	Cellular Component: nucleus (GO:0005634);; Cellular Component: cytosol (GO:0005829);; Biological Process: fatty acid beta-oxidation (GO:0006635);; Cellular Component: proteasome regulatory particle, lid subcomplex (GO:0008541);; Biological Process: toxin catabolic process (GO:0009407);; Biological Process: leaf morphogenesis (GO:0009965);; Biological Process: seed dormancy process (GO:0010162);; …	K03038|7e-30|ath:AT5G05780|RPN8A	[O]	Posttranslational modification, protein turnover, chaperones	JAB1/Mov34/MPN/PAD-1 ubiquitin protease	26S proteasome non-ATPase regulatory subunit 7 homolog A GN=MJJ3.19 OS=Arabidopsis thaliana (Mouse-ear cress) PE=1 SV=1	BnaA09g49900D protein {ECO:0000313|EMBL:CDY06213.1} OS=Brassica napus (Rape) PE=4 SV=1	BnaA09g49900D [Brassica napus]	PREDICTED: Brassica rapa 26S proteasome non-ATPase regulatory subunit 7 homolog A-like (LOC103856875), mRNA
BnaA09g47960D	--	--	--	--	[R]	General function prediction only	PPR repeat family;; PPR repeat;; PPR repeat;; Pentatricopeptide repeat domain	Putative pentatricopeptide repeat-containing protein At1g12700, mitochondrial (Precursor) GN=At1g12700 OS=Arabidopsis thaliana (Mouse-ear cress) PE=3 SV=1	BnaA09g47960D protein {ECO:0000313|EMBL:CDY34870.1} OS=Brassica napus (Rape) PE=4 SV=1	BnaA09g47960D [Brassica napus]	PREDICTED: Brassica rapa pentatricopeptide repeat-containing protein At1g12620-like (LOC103843127), transcript variant X2, mRNA
BnaA09g42320D	[OU]	--	--	--	[O]	Posttranslational modification, protein turnover, chaperones	Zinc knuckle	Cold shock domain-containing protein 3 GN=CSP3 OS=Arabidopsis thaliana (Mouse-ear cress) PE=1 SV=1	BnaA09g42320D protein {ECO:0000313|EMBL:CDY49435.1} OS=Brassica napus (Rape) PE=4 SV=1	BnaA09g42320D [Brassica napus]	PREDICTED: Brassica rapa uncharacterized LOC103842474 (LOC103842474), mRNA
BnaA09g48620D	--	--	Molecular Function: sequence-specific DNA binding transcription factor activity (GO:0003700);; Cellular Component: cytosol (GO:0005829);; Biological Process: regulation of transcription, DNA-templated (GO:0006355);; Cellular Component: CCAAT-binding factor complex (GO:0016602);; Molecular Function: sequence-specific DNA binding (GO:0043565);; Molecular Function: protein heterodimerization activit…	--	[K]	Transcription	Histone-like transcription factor (CBF/NF-Y) and archaeal histone;; Core histone H2A/H2B/H3/H4	Nuclear transcription factor Y subunit C-9 GN=F7G19.16 OS=Arabidopsis thaliana (Mouse-ear cress) PE=2 SV=1	Uncharacterized protein {ECO:0000313|EnsemblPlants:Bra031651.1-P} OS=Brassica rapa subsp. pekinensis (Chinese cabbage) PE=4 SV=1	PREDICTED: nuclear transcription factor Y subunit C-9 [Brassica rapa]	PREDICTED: Brassica rapa nuclear transcription factor Y subunit C-9 (LOC103843367), mRNA
BnaA09g48040D	--	--	Molecular Function: DNA binding (GO:0003677);; Molecular Function: sequence-specific DNA binding transcription factor activity (GO:0003700);; Cellular Component: nucleus (GO:0005634);; Biological Process: regulation of transcription, DNA-templated (GO:0006355);;	--	--	--	bHLH-MYC and R2R3-MYB transcription factors N-terminal;; Helix-loop-helix DNA-binding domain	Transcription factor bHLH90 OS=Arabidopsis thaliana (Mouse-ear cress) PE=2 SV=1	BnaA09g48040D protein {ECO:0000313|EMBL:CDY34878.1} OS=Brassica napus (Rape) PE=4 SV=1	BnaA09g48040D [Brassica napus]	PREDICTED: Brassica rapa transcription factor bHLH90-like (LOC103843287), mRNA
BnaC08g40920D	--	--	--	--	[R]	General function prediction only	PPR repeat family;; PPR repeat;; PPR repeat;; Pentatricopeptide repeat domain;; Tetratricopeptide repeat;; Mitochondrial 28S ribosomal protein S27	Pentatricopeptide repeat-containing protein At3g22470, mitochondrial (Precursor) GN=At3g22470 OS=Arabidopsis thaliana (Mouse-ear cress) PE=2 SV=1	BnaC08g40920D protein {ECO:0000313|EMBL:CDY16031.1} OS=Brassica napus (Rape) PE=4 SV=1	BnaC08g40920D [Brassica napus]	PREDICTED: Brassica rapa pentatricopeptide repeat-containing protein At1g12620-like (LOC103843127), transcript variant X1, mRNA
BnaA09g50020D	--	--	Cellular Component: nucleus (GO:0005634);; Cellular Component: Golgi stack (GO:0005795);; Biological Process: intracellular protein transport (GO:0006886);; Biological Process: intra-Golgi vesicle-mediated transport (GO:0006891);; Molecular Function: protein transporter activity (GO:0008565);;	--	[U]	Intracellular trafficking, secretion, and vesicular transport	VHS domain;; GAT domain	--	BnaA09g50020D protein {ECO:0000313|EMBL:CDY06201.1} OS=Brassica napus (Rape) PE=4 SV=1	BnaA09g50020D [Brassica napus]	PREDICTED: Brassica rapa target of Myb protein 1-like (LOC103843565), mRNA
BnaA09g45990D	--	--	Molecular Function: DNA binding (GO:0003677);; Molecular Function: chromatin binding (GO:0003682);; Cellular Component: nucleus (GO:0005634);;	--	--	--	ELM2 domain	AT-rich interactive domain-containing protein 2 GN=ARID2 OS=Arabidopsis thaliana (Mouse-ear cress) PE=2 SV=1	BnaA09g45990D protein {ECO:0000313|EMBL:CDY33793.1} OS=Brassica napus (Rape) PE=4 SV=1	BnaA09g45990D [Brassica napus]	PREDICTED: Brassica rapa uncharacterized LOC103843019 (LOC103843019), mRNA
BnaA09g47660D	[RTKL]	--	Molecular Function: nucleotide binding (GO:0000166);; Molecular Function: protein kinase activity (GO:0004672);; Cellular Component: plasma membrane (GO:0005886);; Biological Process: phosphorylation (GO:0016310);; Molecular Function: carbohydrate binding (GO:0030246);;	--	--	--	Protein kinase domain;; Protein tyrosine kinase;; PAN-like domain;; S-locus glycoprotein family;; Domain of unknown function (DUF3403)	G-type lectin S-receptor-like serine/threonine-protein kinase At1g11330 (Precursor) GN=At1g11330 OS=Arabidopsis thaliana (Mouse-ear cress) PE=2 SV=3	BnaA09g47660D protein {ECO:0000313|EMBL:CDY34840.1} OS=Brassica napus (Rape) PE=4 SV=1	BnaA09g47660D [Brassica napus]	PREDICTED: Brassica rapa G-type lectin S-receptor-like serine/threonine-protein kinase At1g11330 (LOC103843244), transcript variant X2, mRNA
BnaC08g40760D	--	--	--	--	--	--	--	--	BnaC08g40760D protein {ECO:0000313|EMBL:CDY16047.1} OS=Brassica napus (Rape) PE=4 SV=1	BnaC08g40760D [Brassica napus]	PREDICTED: Brassica rapa uncharacterized LOC103829615 (LOC103829615), transcript variant X2, ncRNA
BnaA09g44800D	--	--	Molecular Function: sequence-specific DNA binding transcription factor activity (GO:0003700);; Molecular Function: protein binding (GO:0005515);; Cellular Component: nucleus (GO:0005634);; Biological Process: regulation of transcription, DNA-templated (GO:0006355);; Biological Process: response to salt stress (GO:0009651);;	K01527|6e-92|ath:AT1G17880|nascent polypeptide-associated complex (NAC) domain-containing protein / BTF3b-like transcription factor, putative	[K]	Transcription	NAC domain	--	BnaA09g44800D protein {ECO:0000313|EMBL:CDY21729.1} OS=Brassica napus (Rape) PE=4 SV=1	BnaA09g44800D [Brassica napus]	PREDICTED: Brassica rapa transcription factor BTF3 homolog 4-like (LOC103842730), mRNA
BnaA09g48870D	--	--	Molecular Function: sequence-specific DNA binding transcription factor activity (GO:0003700);; Cellular Component: nucleus (GO:0005634);; Biological Process: regulation of transcription, DNA-templated (GO:0006355);; Biological Process: abaxial cell fate specification (GO:0010158);;	--	--	--	YABBY protein;; HMG-box domain	Putative axial regulator YABBY 2 GN=YAB2 OS=Arabidopsis thaliana (Mouse-ear cress) PE=2 SV=1	BnaA09g48870D protein {ECO:0000313|EMBL:CDY06316.1} OS=Brassica napus (Rape) PE=4 SV=1	PREDICTED: putative axial regulator YABBY 2 isoform X1 [Brassica rapa]	PREDICTED: Brassica rapa putative axial regulator YABBY 2 (LOC103843396), transcript variant X1, mRNA
BnaA09g45080D	[O]	Posttranslational modification, protein turnover, chaperones	Molecular Function: glutathione transferase activity (GO:0004364);; Cellular Component: cytoplasm (GO:0005737);; Biological Process: toxin catabolic process (GO:0009407);; Biological Process: response to cyclopentenone (GO:0010583);;	--	[O]	Posttranslational modification, protein turnover, chaperones	Glutathione S-transferase, C-terminal domain;; Glutathione S-transferase, C-terminal domain;; Glutathione S-transferase, N-terminal domain;; Glutathione S-transferase, N-terminal domain;; Glutathione S-transferase, C-terminal domain	Glutathione S-transferase U25 GN=GSTU25 OS=Arabidopsis thaliana (Mouse-ear cress) PE=1 SV=1	BnaA09g45080D protein {ECO:0000313|EMBL:CDY21757.1} OS=Brassica napus (Rape) PE=4 SV=1	BnaA09g45080D [Brassica napus]	PREDICTED: Brassica rapa glutathione S-transferase U25-like (LOC103842804), mRNA
BnaC08g42520D	--	--	--	--	--	--	--	--	BnaC08g42520D protein {ECO:0000313|EMBL:CDY22618.1} OS=Brassica napus (Rape) PE=4 SV=1	BnaC08g42520D [Brassica napus]	--
BnaC08g42630D	[O]	Posttranslational modification, protein turnover, chaperones	Molecular Function: translation elongation factor activity (GO:0003746);; Molecular Function: copper ion binding (GO:0005507);; Cellular Component: cell wall (GO:0005618);; Cellular Component: vacuole (GO:0005773);; Cellular Component: cytosol (GO:0005829);; Cellular Component: eukaryotic translation elongation factor 1 complex (GO:0005853);; Cellular Component: plasma membrane (GO:0005886);; Bio…	K03233|0.0|ath:AT1G09640|elongation factor 1B-gamma, putative / eEF-1B gamma, putative	[O]	Posttranslational modification, protein turnover, chaperones	Elongation factor 1 gamma, conserved domain;; Glutathione S-transferase, N-terminal domain;; Glutathione S-transferase, C-terminal domain;; Glutathione S-transferase, N-terminal domain;; Glutathione S-transferase, N-terminal domain;; Glutathione S-transferase, C-terminal domain;; Glutathione S-transferase, C-terminal domain	Probable elongation factor 1-gamma 1 GN=At1g09640 OS=Arabidopsis thaliana (Mouse-ear cress) PE=2 SV=1	BnaC08g42630D protein {ECO:0000313|EMBL:CDY22629.1} OS=Brassica napus (Rape) PE=4 SV=1	BnaC08g42630D [Brassica napus]	PREDICTED: Brassica rapa probable elongation factor 1-gamma 1 (LOC103843341), mRNA
BnaC08g37180D	--	--	Molecular Function: DNA binding (GO:0003677);; Cellular Component: nucleus (GO:0005634);; Molecular Function: protein dimerization activity (GO:0046983);;	--	[L]	Replication, recombination and repair	BED zinc finger	--	BnaC08g37180D protein {ECO:0000313|EMBL:CDX81883.1} OS=Brassica napus (Rape) PE=4 SV=1	BnaC08g37180D [Brassica napus]	PREDICTED: Brassica rapa zinc finger BED domain-containing protein DAYSLEEPER (LOC103842695), transcript variant X2, mRNA
BnaC08g41920D	--	--	Cellular Component: cytoplasm (GO:0005737);; Biological Process: response to auxin (GO:0009733);;	K14487|4e-16|ath:AT1G48670|auxin-responsive GH3 family protein	--	--	--	Probable indole-3-acetic acid-amido synthetase GH3.7 OS=Oryza sativa subsp. japonica (Rice) PE=2 SV=2	BnaC08g41920D protein {ECO:0000313|EMBL:CDY34633.1} OS=Brassica napus (Rape) PE=4 SV=1	BnaC08g41920D [Brassica napus]	PREDICTED: Brassica rapa 4-substituted benzoates-glutamate ligase GH3.12-like (LOC103843293), transcript variant X1, mRNA
BnaA09g48160D	[T]	Signal transduction mechanisms	Molecular Function: phosphorelay response regulator activity (GO:0000156);; Biological Process: phosphorelay signal transduction system (GO:0000160);; Molecular Function: protein serine/threonine kinase activity (GO:0004674);; Molecular Function: protein binding (GO:0005515);; Cellular Component: nucleus (GO:0005634);; Cellular Component: cytoplasm (GO:0005737);; Biological Process: regulation of…	K14492|1e-152|ath:AT1G10470|ARR4	[K]	Transcription	Response regulator receiver domain	Two-component response regulator ARR4 GN=T10O24.8 OS=Arabidopsis thaliana (Mouse-ear cress) PE=1 SV=1	BnaA09g48160D protein {ECO:0000313|EMBL:CDY34890.1} OS=Brassica napus (Rape) PE=4 SV=1	BnaA09g48160D [Brassica napus]	PREDICTED: Brassica rapa two-component response regulator ARR4-like (LOC103847729), mRNA
BnaC08g37140D	--	--	Cellular Component: Golgi apparatus (GO:0005794);; Molecular Function: polygalacturonate 4-alpha-galacturonosyltransferase activity (GO:0047262);;	K13648|4e-82|ath:AT1G18580|GAUT11	--	--	Glycosyl transferase family 8	Probable galacturonosyltransferase 11 GN=GAUT11 OS=Arabidopsis thaliana (Mouse-ear cress) PE=2 SV=1	BnaC08g37140D protein {ECO:0000313|EMBL:CDX81887.1} OS=Brassica napus (Rape) PE=4 SV=1	BnaC08g37140D [Brassica napus]	Brassica oleracea clone BAC B59J16, complete sequence
BnaA09g41690D	--	--	Cellular Component: nucleus (GO:0005634);; Cellular Component: apoplast (GO:0048046);;	--	--	--	Family of unknown function (DUF566)	QWRF motif-containing protein 4 GN=QWRF4 OS=Arabidopsis thaliana (Mouse-ear cress) PE=2 SV=1	BnaA09g41690D protein {ECO:0000313|EMBL:CDY34802.1} OS=Brassica napus (Rape) PE=4 SV=1	BnaA09g41690D [Brassica napus]	PREDICTED: Brassica rapa QWRF motif-containing protein 4-like (LOC103842386), transcript variant X4, mRNA
BnaA09g48630D	[P]	Inorganic ion transport and metabolism	Molecular Function: calcium:sodium antiporter activity (GO:0005432);; Cellular Component: plasma membrane (GO:0005886);; Biological Process: high-affinity potassium ion import (GO:0010163);; Molecular Function: potassium ion transmembrane transporter activity (GO:0015079);; Cellular Component: integral component of membrane (GO:0016021);; Cellular Component: nuclear periphery (GO:0034399);; Biolo…	--	[P]	Inorganic ion transport and metabolism	Sodium/calcium exchanger protein	Cation/calcium exchanger 5 GN=F7G19.17 OS=Arabidopsis thaliana (Mouse-ear cress) PE=2 SV=1	BnaA09g48630D protein {ECO:0000313|EMBL:CDY06340.1} OS=Brassica napus (Rape) PE=4 SV=1	BnaA09g48630D [Brassica napus]	PREDICTED: Brassica rapa cation/calcium exchanger 5 (LOC103843368), mRNA
BnaA09g49800D	[RTKL]	--	Molecular Function: protein tyrosine kinase activity (GO:0004713);; Molecular Function: ATP binding (GO:0005524);; Cellular Component: plasma membrane (GO:0005886);; Biological Process: protein phosphorylation (GO:0006468);; Cellular Component: plasmodesma (GO:0009506);; Molecular Function: protein kinase binding (GO:0019901);;	--	[T]	Signal transduction mechanisms	Protein tyrosine kinase;; Protein kinase domain	PTI1-like tyrosine-protein kinase 1 GN=PTI11 OS=Arabidopsis thaliana (Mouse-ear cress) PE=1 SV=1	BnaA09g49800D protein {ECO:0000313|EMBL:CDY06223.1} OS=Brassica napus (Rape) PE=3 SV=1	BnaA09g49800D [Brassica napus]	PREDICTED: Brassica rapa PTI1-like tyrosine-protein kinase 1 (LOC103843500), transcript variant X2, mRNA
BnaC08g40420D	--	--	Cellular Component: cytoplasm (GO:0005737);; Biological Process: response to oxidative stress (GO:0006979);; Biological Process: salicylic acid biosynthetic process (GO:0009697);; Biological Process: salicylic acid mediated signaling pathway (GO:0009863);; Biological Process: negative regulation of defense response (GO:0031348);; Biological Process: innate immune response (GO:0045087);;	--	[Z]	Cytoskeleton	Regulator of Vps4 activity in the MVB pathway	--	BnaC08g40420D protein {ECO:0000313|EMBL:CDY16081.1} OS=Brassica napus (Rape) PE=4 SV=1	BnaC08g40420D [Brassica napus]	Eutrema salsugineum hypothetical protein (EUTSA_v10007815mg) mRNA, complete cds
BnaA09g50860D	[KL]	--	Molecular Function: DNA binding (GO:0003677);; Molecular Function: helicase activity (GO:0004386);; Molecular Function: ATP binding (GO:0005524);; Cellular Component: nucleus (GO:0005634);; Cellular Component: membrane (GO:0016020);;	--	[KL]	--	Protein kinase domain;; SNF2 family N-terminal domain;; Protein tyrosine kinase;; Helicase conserved C-terminal domain;; Type III restriction enzyme, res subunit	Switch 2 {ECO:0000312|EMBL:AEE27606.1} OS=Arabidopsis thaliana (Mouse-ear cress) PE=3 SV=1	BnaA09g50860D protein {ECO:0000313|EMBL:CDY32510.1} OS=Brassica napus (Rape) PE=4 SV=1	BnaA09g50860D [Brassica napus]	PREDICTED: Brassica rapa DNA excision repair protein ERCC-6-like 2 (LOC103843687), mRNA
BnaA09g47170D	--	--	Molecular Function: nucleic acid binding (GO:0003676);; Cellular Component: nucleus (GO:0005634);; Cellular Component: chloroplast (GO:0009507);;	--	--	--	--	--	BnaA09g47170D protein {ECO:0000313|EMBL:CDY26560.1} OS=Brassica napus (Rape) PE=4 SV=1	BnaA09g47170D [Brassica napus]	PREDICTED: Brassica rapa uncharacterized LOC103843133 (LOC103843133), mRNA
BnaC08g39230D	[LR]	--	Cellular Component: mitochondrion (GO:0005739);; Molecular Function: hydrolase activity (GO:0016787);;	--	[T]	Signal transduction mechanisms	NUDIX domain	Nudix hydrolase 18, mitochondrial (Precursor) GN=F10B6.26 OS=Arabidopsis thaliana (Mouse-ear cress) PE=2 SV=1	BnaC08g39230D protein {ECO:0000313|EMBL:CDX81678.1} OS=Brassica napus (Rape) PE=3 SV=1	BnaC08g39230D [Brassica napus]	PREDICTED: Brassica rapa nudix hydrolase 18, mitochondrial-like (LOC103842936), transcript variant X1, mRNA
BnaC08g39800D	[J]	Translation, ribosomal structure and biogenesis	Molecular Function: RNA binding (GO:0003723);; Cellular Component: extracellular region (GO:0005576);; Molecular Function: ribonuclease T2 activity (GO:0033897);;	K01166|1e-116|ath:AT1G14220|ribonuclease T2 family protein	[R]	General function prediction only	Ribonuclease T2 family;; Endonuclease/Exonuclease/phosphatase family	Ribonuclease 3 (Precursor) GN=RNS3 OS=Arabidopsis thaliana (Mouse-ear cress) PE=2 SV=1	BnaC08g39800D protein {ECO:0000313|EMBL:CDX81621.1} OS=Brassica napus (Rape) PE=3 SV=1	BnaC08g39800D [Brassica napus]	PREDICTED: Brassica rapa ribonuclease 3-like (LOC103842986), mRNA
BnaC08g39680D	[GER]	--	Cellular Component: mitochondrion (GO:0005739);;	--	[R]	General function prediction only	PPR repeat family;; PPR repeat;; UAA transporter family;; PPR repeat;; Pentatricopeptide repeat domain;; Tetratricopeptide repeat	Pentatricopeptide repeat-containing protein At1g12300, mitochondrial (Precursor) GN=At1g12300 OS=Arabidopsis thaliana (Mouse-ear cress) PE=2 SV=1	BnaC08g39680D protein {ECO:0000313|EMBL:CDX81633.1} OS=Brassica napus (Rape) PE=4 SV=1	BnaC08g39680D [Brassica napus]	PREDICTED: Brassica rapa UDP-galactose/UDP-glucose transporter 3-like (LOC103842973), mRNA
BnaC08g36540D	--	--	Cellular Component: extracellular region (GO:0005576);; Biological Process: signal transduction (GO:0007165);;	--	--	--	Leucine Rich repeats (2 copies);; Leucine Rich Repeat;; Leucine rich repeat;; Leucine Rich repeat;; Leucine rich repeat N-terminal domain;; Leucine rich repeat	Leucine-rich repeat extensin-like protein 4 (Precursor) GN=LRX4 OS=Arabidopsis thaliana (Mouse-ear cress) PE=2 SV=1	BnaC08g36540D protein {ECO:0000313|EMBL:CDX81947.1} OS=Brassica napus (Rape) PE=4 SV=1	BnaC08g36540D [Brassica napus]	PREDICTED: Brassica rapa leucine-rich repeat extensin-like protein 6 (LOC103842622), mRNA
BnaC08g42210D	--	--	Cellular Component: nucleus (GO:0005634);; Cellular Component: mitochondrion (GO:0005739);; Biological Process: mitosis (GO:0007067);;	--	[D]	Cell cycle control, cell division, chromosome partitioning	Wings apart-like protein regulation of heterochromatin	--	BnaC08g42210D protein {ECO:0000313|EMBL:CDY34662.1} OS=Brassica napus (Rape) PE=4 SV=1	BnaC08g42210D [Brassica napus]	PREDICTED: Brassica rapa wings apart-like protein homolog (LOC103843279), mRNA
BnaC08g38020D	[Q]	Secondary metabolites biosynthesis, transport and catabolism	Molecular Function: monooxygenase activity (GO:0004497);; Molecular Function: iron ion binding (GO:0005506);; Cellular Component: mitochondrion (GO:0005739);; Molecular Function: electron carrier activity (GO:0009055);; Biological Process: response to light stimulus (GO:0009416);; Biological Process: unidimensional cell growth (GO:0009826);; Biological Process: brassinosteroid biosynthetic proces…	--	[QI]	--	Cytochrome P450	Cytochrome P450 72C1 GN=At1g17060 OS=Arabidopsis thaliana (Mouse-ear cress) PE=2 SV=2	BnaC08g38020D protein {ECO:0000313|EMBL:CDX81799.1} OS=Brassica napus (Rape) PE=3 SV=1	BnaC08g38020D [Brassica napus]	PREDICTED: Brassica rapa cytochrome P450 72C1-like (LOC103849502), mRNA
BnaC08g34820D	--	--	--	K13153|8e-18|ath:AT3G07860|hypothetical protein	--	--	--	U11/U12 small nuclear ribonucleoprotein 25 kDa protein GN=SNRNP25 OS=Arabidopsis thaliana (Mouse-ear cress) PE=2 SV=1	BnaC08g34820D protein {ECO:0000313|EMBL:CDX76896.1} OS=Brassica napus (Rape) PE=4 SV=1	BnaC08g34820D [Brassica napus]	PREDICTED: Brassica rapa U11/U12 small nuclear ribonucleoprotein 25 kDa protein (LOC103859246), transcript variant X5, mRNA
BnaC08g39560D	--	--	Molecular Function: DNA binding (GO:0003677);; Cellular Component: nucleus (GO:0005634);; Cellular Component: cytosol (GO:0005829);; Biological Process: regulation of transcription, DNA-templated (GO:0006355);; Molecular Function: zinc ion binding (GO:0008270);; Biological Process: cellular response to phosphate starvation (GO:0016036);; Molecular Function: methylated histone residue binding (GO:…	--	[R]	General function prediction only	Domain of unknown function (DUF3594);; PHD-finger	PHD finger protein ALFIN-LIKE 7 GN=AL7 OS=Arabidopsis thaliana (Mouse-ear cress) PE=1 SV=1	BnaC08g39560D protein {ECO:0000313|EMBL:CDX81645.1} OS=Brassica napus (Rape) PE=4 SV=1	BnaC08g39560D [Brassica napus]	PREDICTED: Brassica rapa PHD finger protein ALFIN-LIKE 7-like (LOC103842964), mRNA
BnaA09g50160D	--	--	Cellular Component: nucleus (GO:0005634);; Biological Process: chromatin silencing (GO:0006342);; Biological Process: regulation of flower development (GO:0009909);; Biological Process: histone H3-K9 methylation (GO:0051567);;	--	--	--	Protein of unknown function (DUF2805)	--	BnaA09g50160D protein {ECO:0000313|EMBL:CDY06187.1} OS=Brassica napus (Rape) PE=4 SV=1	BnaA09g50160D [Brassica napus]	PREDICTED: Brassica rapa uncharacterized LOC103843582 (LOC103843582), transcript variant X1, mRNA
BnaC08g36090D	--	--	Cellular Component: nucleus (GO:0005634);; Cellular Component: cytoplasm (GO:0005737);; Biological Process: protein targeting to membrane (GO:0006612);; Biological Process: systemic acquired resistance (GO:0009627);; Biological Process: positive regulation of flavonoid biosynthetic process (GO:0009963);; Biological Process: regulation of plant-type hypersensitive response (GO:0010363);;	--	--	--	Arabidopsis phospholipase-like protein (PEARLI 4)	Vegetative cell wall protein gp1 (Precursor) GN=GP1 OS=Chlamydomonas reinhardtii (Chlamydomonas smithii) PE=1 SV=1	BnaC08g36090D protein {ECO:0000313|EMBL:CDX81992.1} OS=Brassica napus (Rape) PE=4 SV=1	BnaC08g36090D [Brassica napus]	PREDICTED: Brassica rapa serine/arginine repetitive matrix protein 1 (LOC103842568), transcript variant X5, mRNA
BnaC08g38980D	--	--	Cellular Component: nucleus (GO:0005634);; Molecular Function: phosphatidylinositol binding (GO:0035091);; Biological Process: intracellular signal transduction (GO:0035556);;	--	[ZUD]	--	PXA domain;; Sorting nexin C terminal;; PX domain	--	BnaC08g38980D protein {ECO:0000313|EMBL:CDX81703.1} OS=Brassica napus (Rape) PE=4 SV=1	BnaC08g38980D [Brassica napus]	PREDICTED: Brassica rapa uncharacterized LOC103842913 (LOC103842913), mRNA
BnaC08g41950D	--	--	--	--	--	--	--	--	BnaC08g41950D protein {ECO:0000313|EMBL:CDY34636.1} OS=Brassica napus (Rape) PE=4 SV=1	BnaC08g41950D [Brassica napus]	--
BnaA09g45340D	--	--	Biological Process: leaf morphogenesis (GO:0009965);; Biological Process: cell growth (GO:0016049);; Biological Process: embryo sac morphogenesis (GO:0048314);; Cellular Component: primary endosperm nucleus (GO:0048353);; Biological Process: petal morphogenesis (GO:0048446);; Biological Process: ovule morphogenesis (GO:0048482);; Biological Process: cell division (GO:0051301);;	--	--	--	Homeobox domain	WUSCHEL-related homeobox 6 GN=F2I9.12 OS=Arabidopsis thaliana (Mouse-ear cress) PE=2 SV=2	BnaA09g45340D protein {ECO:0000313|EMBL:CDY33728.1} OS=Brassica napus (Rape) PE=4 SV=1	BnaA09g45340D [Brassica napus]	PREDICTED: Brassica rapa WUSCHEL-related homeobox 6-like (LOC103843178), mRNA
BnaC08g37420D	[J]	Translation, ribosomal structure and biogenesis	Molecular Function: translation release factor activity (GO:0003747);; Molecular Function: GTPase activity (GO:0003924);; Molecular Function: GTP binding (GO:0005525);; Cellular Component: vacuole (GO:0005773);; Cellular Component: cytosol (GO:0005829);; Biological Process: GTP catabolic process (GO:0006184);; Biological Process: translational termination (GO:0006415);;	K03267|0.0|ath:AT1G18070|EF-1-alpha-related GTP-binding protein, putative	[J]	Translation, ribosomal structure and biogenesis	Elongation factor Tu GTP binding domain;; Elongation factor Tu C-terminal domain;; Elongation factor Tu domain 2;; 50S ribosome-binding GTPase	Elongation factor 1-alpha C GN=TEF-C OS=Porphyra purpurea (Red seaweed) PE=2 SV=1	BnaC08g37420D protein {ECO:0000313|EMBL:CDX81859.1} OS=Brassica napus (Rape) PE=4 SV=1	BnaC08g37420D [Brassica napus]	PREDICTED: Brassica rapa eukaryotic peptide chain release factor GTP-binding subunit ERF3A-like (LOC103842720), mRNA
BnaA09g46790D	--	--	--	--	--	--	AP2 domain	Ethylene-responsive transcription factor ERF088 GN=ERF088 OS=Arabidopsis thaliana (Mouse-ear cress) PE=2 SV=1	BnaA09g46790D protein {ECO:0000313|EMBL:CDY26598.1} OS=Brassica napus (Rape) PE=4 SV=1	BnaA09g46790D [Brassica napus]	PREDICTED: Brassica rapa ethylene-responsive transcription factor ERF088 (LOC103843096), mRNA
BnaC08g43340D	[P]	Inorganic ion transport and metabolism	Cellular Component: nucleus (GO:0005634);; Molecular Function: sodium:hydrogen antiporter activity (GO:0015385);; Cellular Component: integral component of membrane (GO:0016021);; Biological Process: sodium ion transmembrane transport (GO:0035725);;	--	[P]	Inorganic ion transport and metabolism	Sodium/hydrogen exchanger family	Cation/H(+) antiporter 6A OS=Arabidopsis thaliana (Mouse-ear cress) PE=2 SV=2	BnaC08g43340D protein {ECO:0000313|EMBL:CDY22700.1} OS=Brassica napus (Rape) PE=4 SV=1	BnaC08g43340D [Brassica napus]	PREDICTED: Brassica rapa cation/H(+) antiporter 6A-like (LOC103843414), mRNA
BnaC08g42700D	--	--	Molecular Function: DNA binding (GO:0003677);; Molecular Function: sequence-specific DNA binding transcription factor activity (GO:0003700);; Cellular Component: nucleus (GO:0005634);; Biological Process: regulation of transcription, DNA-templated (GO:0006355);; Biological Process: circadian rhythm (GO:0007623);; Biological Process: gravitropism (GO:0009630);; Biological Process: de-etiolation (G…	K12126|0.0|ath:AT1G09530|PIF3	--	--	Helix-loop-helix DNA-binding domain	Transcription factor PIF3 GN=F14J9.19 OS=Arabidopsis thaliana (Mouse-ear cress) PE=1 SV=1	BnaC08g42700D protein {ECO:0000313|EMBL:CDY22636.1} OS=Brassica napus (Rape) PE=4 SV=1	BnaC08g42700D [Brassica napus]	PREDICTED: Brassica rapa transcription factor PIF3-like (LOC103843349), transcript variant X2, mRNA
BnaA09g50720D	--	--	Biological Process: mitotic cell cycle (GO:0000278);; Biological Process: double-strand break repair via homologous recombination (GO:0000724);; Molecular Function: DNA binding (GO:0003677);; Molecular Function: transcription coactivator activity (GO:0003713);; Cellular Component: nucleus (GO:0005634);; Biological Process: DNA-dependent DNA replication (GO:0006261);; Biological Process: regulatio…	K10683|0.0|ath:AT1G04020|BARD1	[LK]	--	BRCA1 C Terminus (BRCT) domain;; PHD-like zinc-binding domain;; zinc-RING finger domain;; Zinc finger, C3HC4 type (RING finger);; Ring finger domain;; Zinc finger, C3HC4 type (RING finger);; Zinc finger, C3HC4 type (RING finger);; twin BRCT domain	Protein BREAST CANCER SUSCEPTIBILITY 1 homolog GN=BRCA1 OS=Arabidopsis thaliana (Mouse-ear cress) PE=2 SV=1	BnaA09g50720D protein {ECO:0000313|EMBL:CDY32524.1} OS=Brassica napus (Rape) PE=4 SV=1	BnaA09g50720D [Brassica napus]	PREDICTED: Brassica rapa protein BREAST CANCER SUSCEPTIBILITY 1 homolog (LOC103843674), mRNA
BnaC08g34330D	--	--	Cellular Component: chloroplast (GO:0009507);;	--	[R]	General function prediction only	Protein of unknown function, DUF607	Calcium uniporter protein 2, mitochondrial (Precursor) OS=Arabidopsis thaliana (Mouse-ear cress) PE=2 SV=1	BnaC08g34330D protein {ECO:0000313|EMBL:CDX76847.1} OS=Brassica napus (Rape) PE=4 SV=1	BnaC08g34330D [Brassica napus]	PREDICTED: Brassica rapa uncharacterized LOC103842401 (LOC103842401), mRNA
BnaA09g46630D	[Q]	Secondary metabolites biosynthesis, transport and catabolism	Molecular Function: monooxygenase activity (GO:0004497);; Molecular Function: iron ion binding (GO:0005506);; Molecular Function: electron carrier activity (GO:0009055);; Cellular Component: plasmodesma (GO:0009506);; Biological Process: response to nitrate (GO:0010167);; Biological Process: nitrate transport (GO:0015706);; Molecular Function: oxidoreductase activity, acting on paired donors, wit…	K00517|1e-112|ath:AT1G13090|CYP71B28	[Q]	Secondary metabolites biosynthesis, transport and catabolism	Cytochrome P450	Cytochrome P450 71B28 GN=CYP71B28 OS=Arabidopsis thaliana (Mouse-ear cress) PE=2 SV=1	BnaA09g46630D protein {ECO:0000313|EMBL:CDY26614.1} OS=Brassica napus (Rape) PE=3 SV=1	BnaA09g46630D [Brassica napus]	PREDICTED: Brassica rapa cytochrome P450 71B28 (LOC103843083), transcript variant X1, mRNA
BnaC08g38990D	--	--	Cellular Component: nucleus (GO:0005634);;	K13114|0.0|ath:AT1G15200|protein-protein interaction regulator family protein	[Z]	Cytoskeleton	pinin/SDK/memA/ protein conserved region	--	BnaC08g38990D protein {ECO:0000313|EMBL:CDX81702.1} OS=Brassica napus (Rape) PE=4 SV=1	BnaC08g38990D [Brassica napus]	PREDICTED: Brassica rapa pinin (LOC103872307), mRNA
BnaA09g42630D	--	--	Molecular Function: transcription regulatory region sequence-specific DNA binding (GO:0000976);; Molecular Function: sequence-specific DNA binding transcription factor activity (GO:0003700);; Molecular Function: protein binding (GO:0005515);; Cellular Component: nucleus (GO:0005634);; Biological Process: response to desiccation (GO:0009269);; Biological Process: response to cold (GO:0009409);; Bi…	K09338|0.0|ath:AT2G22430|ATHB6	[K]	Transcription	Homeobox associated leucine zipper;; Homeobox domain	Homeobox-leucine zipper protein ATHB-6 GN=ATHB-6 OS=Arabidopsis thaliana (Mouse-ear cress) PE=1 SV=1	BnaA09g42630D protein {ECO:0000313|EMBL:CDY13761.1} OS=Brassica napus (Rape) PE=4 SV=1	PREDICTED: homeobox-leucine zipper protein ATHB-6-like [Brassica rapa]	PREDICTED: Brassica rapa homeobox-leucine zipper protein ATHB-6-like (LOC103837893), mRNA
BnaC08g39100D	[OC]	--	Cellular Component: extracellular region (GO:0005576);; Cellular Component: cell wall (GO:0005618);; Molecular Function: zinc ion binding (GO:0008270);; Molecular Function: thiol oxidase activity (GO:0016972);; Biological Process: response to cation stress (GO:0043157);; Biological Process: positive regulation of potassium ion transport (GO:0043268);; Biological Process: cell redox homeostasis (G…	--	[D]	Cell cycle control, cell division, chromosome partitioning	Erv1 / Alr family;; Thioredoxin	Sulfhydryl oxidase 1 (Precursor) GN=T15D22.7 OS=Arabidopsis thaliana (Mouse-ear cress) PE=2 SV=1	Sulfhydryl oxidase {ECO:0000256|RuleBase:RU371123} OS=Brassica napus (Rape) PE=4 SV=1	BnaC08g39100D [Brassica napus]	PREDICTED: Brassica rapa sulfhydryl oxidase 1 (LOC103842925), mRNA
BnaC08g37570D	[F]	Nucleotide transport and metabolism	Cellular Component: plasma membrane (GO:0005886);; Cellular Component: integral component of membrane (GO:0016021);;	--	[F]	Nucleotide transport and metabolism	Ribonucleotide reductase, small chain	Ribonucleoside-diphosphate reductase small chain C GN=TSO2 OS=Arabidopsis thaliana (Mouse-ear cress) PE=1 SV=1	BnaC08g37570D protein {ECO:0000313|EMBL:CDX81844.1} OS=Brassica napus (Rape) PE=4 SV=1	BnaC08g37570D [Brassica napus]	PREDICTED: Brassica rapa SPX and EXS domain-containing protein 1-like (LOC103829394), mRNA
BnaC08g40840D	[R]	General function prediction only	Molecular Function: nucleotide binding (GO:0000166);; Cellular Component: nucleus (GO:0005634);; Biological Process: anthocyanin-containing compound biosynthetic process (GO:0009718);; Biological Process: entrainment of circadian clock by photoperiod (GO:0043153);; Molecular Function: transcription regulatory region DNA binding (GO:0044212);; Biological Process: photoperiodism, flowering (GO:0048…	K11805|0.0|ath:AT1G12910|ATAN11	[S]	Function unknown	WD domain, G-beta repeat	WD repeat-containing protein LWD1 GN=F13K23.16 OS=Arabidopsis thaliana (Mouse-ear cress) PE=2 SV=1	BnaC08g40840D protein {ECO:0000313|EMBL:CDY16039.1} OS=Brassica napus (Rape) PE=4 SV=1	BnaC08g40840D [Brassica napus]	PREDICTED: Brassica rapa WD repeat-containing protein LWD1 (LOC103843095), mRNA
BnaA09g47890D	--	--	Molecular Function: calmodulin binding (GO:0005516);; Cellular Component: plasma membrane (GO:0005886);; Biological Process: defense response (GO:0006952);; Biological Process: cell death (GO:0008219);; Biological Process: response to biotic stimulus (GO:0009607);; Cellular Component: integral component of membrane (GO:0016021);;	K08472|0.0|ath:AT1G11000|MLO4	--	--	Mlo family	MLO-like protein 4 GN=MLO4 OS=Arabidopsis thaliana (Mouse-ear cress) PE=2 SV=2	MLO-like protein {ECO:0000256|RuleBase:RU280816} OS=Brassica napus (Rape) PE=3 SV=1	PREDICTED: MLO-like protein 4 isoform X1 [Brassica rapa]	PREDICTED: Brassica rapa MLO-like protein 4 (LOC103843274), transcript variant X2, mRNA
BnaC08g36500D	--	--	Cellular Component: Golgi apparatus (GO:0005794);; Molecular Function: ceramide glucosyltransferase activity (GO:0008120);;	--	[IM]	--	Glycosyl transferase family 21;; Glycosyltransferase like family 2;; Glycosyl transferase family 2	--	BnaC08g36500D protein {ECO:0000313|EMBL:CDX81951.1} OS=Brassica napus (Rape) PE=4 SV=1	BnaC08g36500D [Brassica napus]	PREDICTED: Brassica rapa uncharacterized LOC103842619 (LOC103842619), mRNA
BnaA09g41610D	--	--	Cellular Component: nucleus (GO:0005634);;	--	--	--	Zein-binding	--	BnaA09g41610D protein {ECO:0000313|EMBL:CDY34794.1} OS=Brassica napus (Rape) PE=4 SV=1	BnaA09g41610D [Brassica napus]	PREDICTED: Brassica rapa autophagy-related protein 11 (LOC103842379), mRNA
BnaA09g49850D	--	--	--	--	--	--	--	--	BnaA09g49850D protein {ECO:0000313|EMBL:CDY06218.1} OS=Brassica napus (Rape) PE=4 SV=1	BnaA09g49850D [Brassica napus]	PREDICTED: Brassica rapa pentatricopeptide repeat-containing protein At1g06580 (LOC103843546), mRNA
BnaA09g44510D	--	--	Molecular Function: DNA binding (GO:0003677);; Cellular Component: nucleus (GO:0005634);; Molecular Function: protein dimerization activity (GO:0046983);;	--	[L]	Replication, recombination and repair	hAT family C-terminal dimerisation region;; Domain of unknown function (DUF4413)	Zinc finger BED domain-containing protein DAYSLEEPER GN=HAT OS=Arabidopsis thaliana (Mouse-ear cress) PE=1 SV=1	BnaA09g44510D protein {ECO:0000313|EMBL:CDY21700.1} OS=Brassica napus (Rape) PE=4 SV=1	BnaA09g44510D [Brassica napus]	PREDICTED: Brassica rapa zinc finger BED domain-containing protein DAYSLEEPER (LOC103842695), transcript variant X2, mRNA
BnaA09g45350D	[IQR]	--	Molecular Function: oxidoreductase activity (GO:0016491);;	--	[R]	General function prediction only	short chain dehydrogenase;; Enoyl-(Acyl carrier protein) reductase;; KR domain	Short-chain dehydrogenase reductase 3b GN=F14M4 OS=Arabidopsis thaliana (Mouse-ear cress) PE=2 SV=1	BnaA09g45350D protein {ECO:0000313|EMBL:CDY33729.1} OS=Brassica napus (Rape) PE=4 SV=1	BnaA09g45350D [Brassica napus]	PREDICTED: Brassica rapa short-chain dehydrogenase reductase 3b-like (LOC103843179), mRNA
BnaC08g35710D	--	--	Biological Process: methylation (GO:0032259);;	--	--	--	--	DNA (cytosine-5)-methyltransferase DRM2 GN=T15N1.110/T15N1.120 OS=Arabidopsis thaliana (Mouse-ear cress) PE=1 SV=1	BnaC08g35710D protein {ECO:0000313|EMBL:CDX82030.1} OS=Brassica napus (Rape) PE=4 SV=1	BnaC08g35710D [Brassica napus]	PREDICTED: Brassica rapa DNA (cytosine-5)-methyltransferase DRM2-like (LOC103842526), mRNA
BnaC08g41000D	--	--	--	--	--	--	--	Thionin-like protein 2 (Precursor) GN=At1g12663 OS=Arabidopsis thaliana (Mouse-ear cress) PE=3 SV=1	BnaC08g41000D protein {ECO:0000313|EMBL:CDY16023.1} OS=Brassica napus (Rape) PE=4 SV=1	BnaC08g41000D [Brassica napus]	PREDICTED: Brassica rapa thionin-like protein 2 (LOC103843112), mRNA
BnaC08g35130D	--	--	Molecular Function: peroxidase activity (GO:0004601);; Cellular Component: extracellular region (GO:0005576);; Cellular Component: cytosol (GO:0005829);; Biological Process: response to oxidative stress (GO:0006979);; Biological Process: determination of bilateral symmetry (GO:0009855);; Biological Process: polarity specification of adaxial/abaxial axis (GO:0009944);; Biological Process: meristem…	K00430|0.0|ath:AT2G22420|peroxidase 17 (PER17) (P17)	--	--	Peroxidase	Peroxidase 17 (Precursor) GN=F14M13.18 OS=Arabidopsis thaliana (Mouse-ear cress) PE=2 SV=1	BnaC08g35130D protein {ECO:0000313|EMBL:CDX76927.1} OS=Brassica napus (Rape) PE=3 SV=1	BnaC08g35130D [Brassica napus]	PREDICTED: Brassica rapa peroxidase 17-like (LOC103837896), mRNA
BnaA09g48860D	--	--	Molecular Function: copper ion binding (GO:0005507);; Cellular Component: plasma membrane (GO:0005886);; Molecular Function: electron carrier activity (GO:0009055);; Cellular Component: anchored component of membrane (GO:0031225);;	--	--	--	Plastocyanin-like domain	Early nodulin-like protein 1 (Precursor) GN=At2g25060 OS=Arabidopsis thaliana (Mouse-ear cress) PE=1 SV=2	BnaA09g48860D protein {ECO:0000313|EMBL:CDY06317.1} OS=Brassica napus (Rape) PE=4 SV=1	BnaA09g48860D [Brassica napus]	PREDICTED: Brassica rapa early nodulin-like protein 1 (LOC103843394), mRNA
BnaA09g51040D	--	--	Molecular Function: signal transducer activity (GO:0004871);; Cellular Component: plasma membrane (GO:0005886);; Biological Process: signal transduction (GO:0007165);; Biological Process: response to light stimulus (GO:0009416);; Biological Process: pollen tube growth (GO:0009860);;	--	--	--	NPH3 family	BTB/POZ domain-containing protein At1g03010 GN=At1g03010 OS=Arabidopsis thaliana (Mouse-ear cress) PE=2 SV=1	BnaA09g51040D protein {ECO:0000313|EMBL:CDY32492.1} OS=Brassica napus (Rape) PE=4 SV=1	BnaA09g51040D [Brassica napus]	PREDICTED: Brassica rapa BTB/POZ domain-containing protein At1g03010-like (LOC103843714), transcript variant X1, mRNA
BnaA09g44610D	[O]	Posttranslational modification, protein turnover, chaperones	Cellular Component: mitochondrial inner membrane presequence translocase complex (GO:0005744);; Cellular Component: chloroplast (GO:0009507);; Biological Process: embryo development ending in seed dormancy (GO:0009793);; Biological Process: protein transport (GO:0015031);; Molecular Function: P-P-bond-hydrolysis-driven protein transmembrane transporter activity (GO:0015450);; Cellular Component: …	--	[U]	Intracellular trafficking, secretion, and vesicular transport	Tim17/Tim22/Tim23/Pmp24 family	Mitochondrial import inner membrane translocase subunit TIM22-1 (Precursor) GN=T22K18.6 OS=Arabidopsis thaliana (Mouse-ear cress) PE=1 SV=1	BnaA09g44610D protein {ECO:0000313|EMBL:CDY21710.1} OS=Brassica napus (Rape) PE=4 SV=1	PREDICTED: mitochondrial import inner membrane translocase subunit TIM22-4 [Brassica rapa]	PREDICTED: Brassica rapa mitochondrial import inner membrane translocase subunit TIM22-4 (LOC103842705), mRNA
BnaA09g43550D	--	--	Cellular Component: extracellular region (GO:0005576);; Biological Process: stomatal complex patterning (GO:0010375);; Biological Process: negative regulation of stomatal complex development (GO:2000122);;	--	--	--	--	MEPF1 {ECO:0000303|PubMed:22241782} (Precursor) OS=Arabidopsis thaliana (Mouse-ear cress) PE=1 SV=1	BnaA09g43550D protein {ECO:0000313|EMBL:CDY13853.1} OS=Brassica napus (Rape) PE=4 SV=1	PREDICTED: protein EPIDERMAL PATTERNING FACTOR 1 [Brassica rapa]	PREDICTED: Brassica rapa protein EPIDERMAL PATTERNING FACTOR 1 (LOC103842577), mRNA
BnaA09g45200D	[R]	General function prediction only	Cellular Component: cytoplasm (GO:0005737);; Biological Process: gibberellin biosynthetic process (GO:0009686);; Biological Process: response to abscisic acid (GO:0009737);; Biological Process: gibberellic acid mediated signaling pathway (GO:0009740);; Biological Process: embryo development ending in seed dormancy (GO:0009793);; Biological Process: flavonoid biosynthetic process (GO:0009813);; Bi…	--	[QR]	--	2OG-Fe(II) oxygenase superfamily;; non-haem dioxygenase in morphine synthesis N-terminal	Protein SRG1 GN=SRG1 OS=Arabidopsis thaliana (Mouse-ear cress) PE=2 SV=1	BnaA09g45200D protein {ECO:0000313|EMBL:CDY21769.1} OS=Brassica napus (Rape) PE=3 SV=1	BnaA09g45200D [Brassica napus]	PREDICTED: Brassica rapa protein SRG1 (LOC103842815), mRNA
BnaC08g41590D	--	--	Biological Process: cell morphogenesis involved in differentiation (GO:0000904);; Molecular Function: structural constituent of cell wall (GO:0005199);; Cellular Component: plant-type cell wall (GO:0009505);; Cellular Component: plasmodesma (GO:0009506);; Biological Process: unidimensional cell growth (GO:0009826);; Molecular Function: histidine phosphotransfer kinase activity (GO:0009927);; Biol…	--	--	--	Leucine Rich repeats (2 copies);; Leucine rich repeat;; Leucine Rich Repeat;; Leucine rich repeat N-terminal domain;; Leucine Rich repeat	Leucine-rich repeat extensin-like protein 1 (Precursor) GN=LRX1 OS=Arabidopsis thaliana (Mouse-ear cress) PE=1 SV=1	BnaC08g41590D protein {ECO:0000313|EMBL:CDY15964.1} OS=Brassica napus (Rape) PE=4 SV=1	BnaC08g41590D [Brassica napus]	PREDICTED: Brassica rapa leucine-rich repeat extensin-like protein 1 (LOC103843159), mRNA
BnaC08g37170D	--	--	Molecular Function: DNA binding (GO:0003677);; Cellular Component: nucleus (GO:0005634);;	--	[L]	Replication, recombination and repair	hAT family C-terminal dimerisation region;; Domain of unknown function (DUF4413)	Putative AC transposase OS=Zea mays (Maize) PE=2 SV=2	BnaC08g37170D protein {ECO:0000313|EMBL:CDX81884.1} OS=Brassica napus (Rape) PE=4 SV=1	BnaC08g37170D [Brassica napus]	Brassica oleracea clone BAC B59J16, complete sequence
BnaC08g35480D	--	--	Molecular Function: monooxygenase activity (GO:0004497);; Molecular Function: iron ion binding (GO:0005506);; Cellular Component: extracellular region (GO:0005576);; Molecular Function: electron carrier activity (GO:0009055);; Molecular Function: oxidoreductase activity, acting on paired donors, with incorporation or reduction of molecular oxygen (GO:0016705);; Molecular Function: oxygen binding …	--	[QI]	--	Cytochrome P450	Alkane hydroxylase MAH1 {ECO:0000303|PubMed:17905869} OS=Arabidopsis thaliana (Mouse-ear cress) PE=2 SV=1	BnaC08g35480D protein {ECO:0000313|EMBL:CDX76962.1} OS=Brassica napus (Rape) PE=3 SV=1	BnaC08g35480D [Brassica napus]	PREDICTED: Brassica rapa cytochrome P450 86B1 (LOC103842490), mRNA
BnaC08g36300D	[E]	Amino acid transport and metabolism	Molecular Function: L-tyrosine:2-oxoglutarate aminotransferase activity (GO:0004838);; Cellular Component: cytosol (GO:0005829);; Biological Process: L-phenylalanine catabolic process (GO:0006559);; Biological Process: tyrosine catabolic process (GO:0006572);; Molecular Function: 1-aminocyclopropane-1-carboxylate synthase activity (GO:0016847);; Molecular Function: pyridoxal phosphate binding (GO…	K00815|0.0|ath:AT5G36160|aminotransferase-related	[E]	Amino acid transport and metabolism	Aminotransferase class I and II;; Beta-eliminating lyase	Tyrosine aminotransferase GN=TAT OS=Arabidopsis thaliana (Mouse-ear cress) PE=2 SV=1	BnaC08g36300D protein {ECO:0000313|EMBL:CDX81971.1} OS=Brassica napus (Rape) PE=4 SV=1	BnaC08g36300D [Brassica napus]	PREDICTED: Brassica rapa tyrosine aminotransferase-like (LOC103842591), mRNA
BnaC08g43000D	--	--	Molecular Function: GPI-anchor transamidase activity (GO:0003923);; Cellular Component: endoplasmic reticulum (GO:0005783);; Biological Process: proteolysis (GO:0006508);; Biological Process: sterol biosynthetic process (GO:0016126);; Biological Process: sphingoid biosynthetic process (GO:0046520);;	--	[O]	Posttranslational modification, protein turnover, chaperones	Peptidase C13 family	Vacuolar-processing enzyme alpha-isozyme (Precursor) GN=At2g25940 OS=Arabidopsis thaliana (Mouse-ear cress) PE=2 SV=2	BnaC08g43000D protein {ECO:0000313|EMBL:CDY22666.1} OS=Brassica napus (Rape) PE=4 SV=1	BnaC08g43000D [Brassica napus]	PREDICTED: Brassica rapa serine/threonine-protein kinase EDR1 (LOC103843381), transcript variant X1, mRNA
BnaC08g39220D	--	--	--	--	--	--	--	--	BnaC08g39220D protein {ECO:0000313|EMBL:CDX81679.1} OS=Brassica napus (Rape) PE=4 SV=1	BnaC08g39220D [Brassica napus]	--
BnaA09g42550D	--	--	Cellular Component: mitochondrion (GO:0005739);;	--	--	--	--	Extensin (Precursor) GN=HRGP OS=Zea mays (Maize) PE=2 SV=1	BnaA09g42550D protein {ECO:0000313|EMBL:CDY13753.1} OS=Brassica napus (Rape) PE=4 SV=1	PREDICTED: extensin [Brassica rapa]	PREDICTED: Brassica rapa extensin (LOC103837885), mRNA
BnaC08g35820D	[G]	Carbohydrate transport and metabolism	Molecular Function: fructose-bisphosphate aldolase activity (GO:0004332);; Biological Process: glycolysis (GO:0006096);; Biological Process: pentose-phosphate shunt (GO:0006098);; Biological Process: rRNA processing (GO:0006364);; Biological Process: glycine catabolic process (GO:0006546);; Biological Process: unsaturated fatty acid biosynthetic process (GO:0006636);; Biological Process: vitamin …	K01623|0.0|ath:AT4G38970|fructose-bisphosphate aldolase, putative	[G]	Carbohydrate transport and metabolism	Fructose-bisphosphate aldolase class-I	Probable fructose-bisphosphate aldolase 1, chloroplastic (Precursor) GN=FBA1 OS=Arabidopsis thaliana (Mouse-ear cress) PE=1 SV=2	Fructose-bisphosphate aldolase {ECO:0000256|RuleBase:RU003994} OS=Brassica napus (Rape) PE=3 SV=1	BnaC08g35820D [Brassica napus]	PREDICTED: Brassica rapa probable fructose-bisphosphate aldolase 1, chloroplastic (LOC103842537), transcript variant X1, mRNA
BnaC08g35110D	--	--	--	--	--	--	--	--	BnaC08g35110D protein {ECO:0000313|EMBL:CDX76925.1} OS=Brassica napus (Rape) PE=4 SV=1	BnaC08g35110D [Brassica napus]	PREDICTED: Brassica rapa uncharacterized LOC103845686 (LOC103845686), ncRNA
BnaA09g49650D	--	--	Molecular Function: metalloendopeptidase activity (GO:0004222);; Cellular Component: cytosol (GO:0005829);; Biological Process: proteolysis (GO:0006508);; Molecular Function: zinc ion binding (GO:0008270);;	K01411|7e-60|ath:AT1G06900|catalytic/ metal ion binding / metalloendopeptidase/ zinc ion binding	[O]	Posttranslational modification, protein turnover, chaperones	--	Zinc-metallopeptidase, peroxisomal GN=PXM16 OS=Arabidopsis thaliana (Mouse-ear cress) PE=2 SV=1	BnaA09g49650D protein {ECO:0000313|EMBL:CDY06238.1} OS=Brassica napus (Rape) PE=4 SV=1	BnaA09g49650D [Brassica napus]	PREDICTED: Brassica rapa insulin-degrading enzyme-like (LOC103843540), mRNA
BnaA09g42640D	--	--	Cellular Component: signal peptidase complex (GO:0005787);; Biological Process: signal peptide processing (GO:0006465);; Molecular Function: peptidase activity (GO:0008233);; Cellular Component: integral component of membrane (GO:0016021);; Biological Process: sterol biosynthetic process (GO:0016126);; Biological Process: sphingoid biosynthetic process (GO:0046520);;	--	[U]	Intracellular trafficking, secretion, and vesicular transport	Microsomal signal peptidase 12 kDa subunit (SPC12)	Probable signal peptidase complex subunit 1 GN=At2g22425 OS=Arabidopsis thaliana (Mouse-ear cress) PE=2 SV=1	BnaA09g42640D protein {ECO:0000313|EMBL:CDY13762.1} OS=Brassica napus (Rape) PE=4 SV=1	BnaA09g42640D [Brassica napus]	PREDICTED: Brassica rapa probable signal peptidase complex subunit 1 (LOC103837895), mRNA
BnaA09g42810D	--	--	Cellular Component: nucleus (GO:0005634);; Cellular Component: cytosol (GO:0005829);; Cellular Component: plasma membrane (GO:0005886);; Cellular Component: plasmodesma (GO:0009506);; Biological Process: plant-type cell wall biogenesis (GO:0009832);; Biological Process: cellulose biosynthetic process (GO:0030244);; Biological Process: anisotropic cell growth (GO:0051211);;	--	[S]	Function unknown	Armadillo/beta-catenin-like repeat;; HEAT repeats;; C2 domain;; HEAT repeat	U-box domain-containing protein 10 GN=PUB10 OS=Arabidopsis thaliana (Mouse-ear cress) PE=2 SV=1	BnaA09g42810D protein {ECO:0000313|EMBL:CDY13779.1} OS=Brassica napus (Rape) PE=4 SV=1	BnaA09g42810D [Brassica napus]	PREDICTED: Brassica rapa uncharacterized LOC103842477 (LOC103842477), mRNA
BnaC08g40700D	--	--	Cellular Component: nucleus (GO:0005634);; Biological Process: chromatin assembly or disassembly (GO:0006333);; Biological Process: methylation-dependent chromatin silencing (GO:0006346);; Biological Process: pyrimidine ribonucleotide biosynthetic process (GO:0009220);; Biological Process: regulation of flower development (GO:0009909);; Molecular Function: U1 snRNA binding (GO:0030619);; Molecula…	K13150|0.0|ath:AT1G13030|sphere organelles protein-related	--	--	--	--	BnaC08g40700D protein {ECO:0000313|EMBL:CDY16053.1} OS=Brassica napus (Rape) PE=4 SV=1	BnaC08g40700D [Brassica napus]	PREDICTED: Brassica rapa coilin-like (LOC103843087), mRNA
BnaC08g42850D	[R]	General function prediction only	Molecular Function: protein serine/threonine kinase activity (GO:0004674);; Molecular Function: protein binding (GO:0005515);; Cellular Component: nucleus (GO:0005634);; Molecular Function: protein kinase activator activity (GO:0030295);; Molecular Function: adenyl nucleotide binding (GO:0030554);; Biological Process: cellular response to glucose starvation (GO:0042149);; Biological Process: posi…	--	[C]	Energy production and conversion	CBS domain	Sucrose nonfermenting 4-like protein GN=F7G19.11 OS=Arabidopsis thaliana (Mouse-ear cress) PE=1 SV=1	BnaC08g42850D protein {ECO:0000313|EMBL:CDY22651.1} OS=Brassica napus (Rape) PE=4 SV=1	BnaC08g42850D [Brassica napus]	PREDICTED: Brassica rapa sucrose nonfermenting 4-like protein (LOC103871638), mRNA
BnaA09g43980D	--	--	Molecular Function: ATP binding (GO:0005524);; Cellular Component: nucleus (GO:0005634);; Cellular Component: endoplasmic reticulum (GO:0005783);; Cellular Component: plasma membrane (GO:0005886);; Biological Process: ATP catabolic process (GO:0006200);; Biological Process: cation transport (GO:0006812);; Biological Process: drug transmembrane transport (GO:0006855);; Biological Process: cellular…	K01552|3e-61|ath:AT5G23630|ATPase E1-E2 type family protein / haloacid dehalogenase-like hydrolase familiy protein	[P]	Inorganic ion transport and metabolism	--	Probable manganese-transporting ATPase PDR2 GN=MQM1.11 OS=Arabidopsis thaliana (Mouse-ear cress) PE=1 SV=1	BnaA09g43980D protein {ECO:0000313|EMBL:CDY21647.1} OS=Brassica napus (Rape) PE=4 SV=1	PREDICTED: probable manganese-transporting ATPase PDR2 [Brassica rapa]	PREDICTED: Brassica rapa probable manganese-transporting ATPase PDR2 (LOC103854754), mRNA >gi|685290109|ref|XM_009137758.1| PREDICTED: Brassica rapa probable manganese-transporting ATPase PDR2 (LOC103860159), mRNA
BnaA09g51440D	--	--	Molecular Function: endonuclease activity (GO:0004519);; Molecular Function: exonuclease activity (GO:0004527);; Molecular Function: calcium ion binding (GO:0005509);; Cellular Component: nucleus (GO:0005634);; Biological Process: metabolic process (GO:0008152);; Biological Process: response to cold (GO:0009409);;	--	[K]	Transcription	Endonuclease/Exonuclease/phosphatase family	Uncharacterized calcium-binding protein At1g02270 GN=At1g02270 OS=Arabidopsis thaliana (Mouse-ear cress) PE=2 SV=2	BnaA09g51440D protein {ECO:0000313|EMBL:CDY32452.1} OS=Brassica napus (Rape) PE=4 SV=1	BnaA09g51440D [Brassica napus]	PREDICTED: Brassica rapa uncharacterized calcium-binding protein At1g02270-like (LOC103843764), mRNA
BnaA09g42780D	--	--	Cellular Component: nucleus (GO:0005634);; Biological Process: membrane fusion (GO:0006944);; Biological Process: plant-type cell wall modification (GO:0009827);; Biological Process: pollen tube growth (GO:0009860);;	--	--	--	--	Putative F-box/LRR-repeat/kelch-repeat protein At1g11620 GN=At1g11620 OS=Arabidopsis thaliana (Mouse-ear cress) PE=3 SV=1	BnaA09g42780D protein {ECO:0000313|EMBL:CDY13776.1} OS=Brassica napus (Rape) PE=4 SV=1	BnaA09g42780D [Brassica napus]	PREDICTED: Brassica rapa uncharacterized LOC103837908 (LOC103837908), mRNA
BnaC08g42150D	[U]	Intracellular trafficking, secretion, and vesicular transport	Molecular Function: SNAP receptor activity (GO:0005484);; Cellular Component: plasma membrane (GO:0005886);; Biological Process: intracellular protein transport (GO:0006886);; Biological Process: membrane fusion (GO:0006944);; Biological Process: pollen tube growth (GO:0009860);; Biological Process: vesicle-mediated transport (GO:0016192);; Cellular Component: transport vesicle (GO:0030133);;	K08486|0.0|ath:AT1G11250|SYP125	[U]	Intracellular trafficking, secretion, and vesicular transport	SNARE domain;; Syntaxin	Syntaxin-125 GN=SYP125 OS=Arabidopsis thaliana (Mouse-ear cress) PE=2 SV=1	BnaC08g42150D protein {ECO:0000313|EMBL:CDY34656.1} OS=Brassica napus (Rape) PE=3 SV=1	BnaC08g42150D [Brassica napus]	PREDICTED: Brassica rapa syntaxin-125-like (LOC103843248), mRNA
BnaC08g43100D	[OC]	--	Biological Process: glycerol ether metabolic process (GO:0006662);; Molecular Function: electron carrier activity (GO:0009055);; Cellular Component: chloroplast stroma (GO:0009570);; Molecular Function: protein disulfide oxidoreductase activity (GO:0015035);; Molecular Function: oxidoreductase activity, acting on a sulfur group of donors, disulfide as acceptor (GO:0016671);; Cellular Component: c…	--	[O]	Posttranslational modification, protein turnover, chaperones	Thioredoxin	Thioredoxin-like 1-1, chloroplastic (Precursor) GN=At1g08570 OS=Arabidopsis thaliana (Mouse-ear cress) PE=2 SV=1	BnaC08g43100D protein {ECO:0000313|EMBL:CDY22676.1} OS=Brassica napus (Rape) PE=4 SV=1	BnaC08g43100D [Brassica napus]	PREDICTED: Brassica rapa thioredoxin-like 1-1, chloroplastic (LOC103843391), mRNA
BnaA09g45460D	--	--	Cellular Component: nucleus (GO:0005634);; Biological Process: proline transport (GO:0015824);;	--	--	--	MAC/Perforin domain	MACPF domain-containing protein At1g14780 GN=At1g14780 OS=Arabidopsis thaliana (Mouse-ear cress) PE=2 SV=1	BnaA09g45460D protein {ECO:0000313|EMBL:CDY33740.1} OS=Brassica napus (Rape) PE=4 SV=1	BnaA09g45460D [Brassica napus]	PREDICTED: Brassica rapa MACPF domain-containing protein At1g14780-like (LOC103842943), mRNA
BnaC08g34220D	--	--	Molecular Function: binding (GO:0005488);; Molecular Function: oxidoreductase activity (GO:0016491);;	K00517|2e-99|ath:AT3G26280|CYP71B4	[Q]	Secondary metabolites biosynthesis, transport and catabolism	Cytochrome P450	Cytochrome P450 71B4 GN=CYP71B4 OS=Arabidopsis thaliana (Mouse-ear cress) PE=2 SV=2	BnaC08g34220D protein {ECO:0000313|EMBL:CDX76836.1} OS=Brassica napus (Rape) PE=4 SV=1	BnaC08g34220D [Brassica napus]	PREDICTED: Brassica rapa cytochrome P450 71B3-like (LOC103842434), mRNA
BnaC08g42140D	[GEPR]	--	Molecular Function: sugar:hydrogen symporter activity (GO:0005351);; Cellular Component: nucleus (GO:0005634);; Cellular Component: vacuole (GO:0005773);; Cellular Component: plasma membrane (GO:0005886);; Cellular Component: plasmodesma (GO:0009506);; Biological Process: response to nematode (GO:0009624);; Biological Process: systemic acquired resistance (GO:0009627);; Biological Process: respon…	--	[R]	General function prediction only	Sugar (and other) transporter;; Major Facilitator Superfamily	Sugar transport protein 1 GN=STP1 OS=Arabidopsis thaliana (Mouse-ear cress) PE=1 SV=2	BnaC08g42140D protein {ECO:0000313|EMBL:CDY34655.1} OS=Brassica napus (Rape) PE=3 SV=1	BnaC08g42140D [Brassica napus]	PREDICTED: Brassica rapa sugar transport protein 1 (LOC103843247), mRNA
BnaC08g39320D	--	--	--	--	--	--	--	--	BnaC08g39320D protein {ECO:0000313|EMBL:CDX81669.1} OS=Brassica napus (Rape) PE=4 SV=1	BnaC08g39320D [Brassica napus]	Brassica rapa subsp. pekinensis clone KBrB028K05, complete sequence
BnaC08g39670D	[RTKL]	--	Molecular Function: protein serine/threonine kinase activity (GO:0004674);; Molecular Function: ATP binding (GO:0005524);; Cellular Component: nucleus (GO:0005634);; Cellular Component: plasma membrane (GO:0005886);; Biological Process: protein phosphorylation (GO:0006468);; Cellular Component: chloroplast (GO:0009507);;	K00924|0.0|ath:AT1G14370|APK2A	[T]	Signal transduction mechanisms	Protein tyrosine kinase;; Protein kinase domain	Protein kinase 2A, chloroplastic (Precursor) GN=APK2A OS=Arabidopsis thaliana (Mouse-ear cress) PE=2 SV=1	BnaC08g39670D protein {ECO:0000313|EMBL:CDX81634.1} OS=Brassica napus (Rape) PE=3 SV=1	BnaC08g39670D [Brassica napus]	PREDICTED: Brassica rapa protein kinase 2A, chloroplastic (LOC103842971), mRNA
BnaA09g49590D	[K]	Transcription	--	K03120|3e-17|ath:AT1G55520|TBP2	[K]	Transcription	--	TATA-box-binding protein GN=TBP OS=Solanum tuberosum (Potato) PE=2 SV=1	BnaA09g49590D protein {ECO:0000313|EMBL:CDY06244.1} OS=Brassica napus (Rape) PE=4 SV=1	BnaA09g49590D [Brassica napus]	Brassica rapa subsp. pekinensis clone KBrH138P04, complete sequence
BnaC08g42790D	--	--	Cellular Component: plasma membrane (GO:0005886);; Biological Process: iron ion transport (GO:0006826);; Biological Process: defense response (GO:0006952);; Biological Process: response to heat (GO:0009408);; Biological Process: seed germination (GO:0009845);; Biological Process: cellular response to iron ion starvation (GO:0010106);; Biological Process: response to nitrate (GO:0010167);; Biologi…	--	[PQ]	--	Respiratory burst NADPH oxidase	Respiratory burst oxidase homolog protein B GN=RBOHB OS=Arabidopsis thaliana (Mouse-ear cress) PE=2 SV=1	BnaC08g42790D protein {ECO:0000313|EMBL:CDY22645.1} OS=Brassica napus (Rape) PE=4 SV=1	BnaC08g42790D [Brassica napus]	PREDICTED: Brassica rapa respiratory burst oxidase homolog protein B (LOC103843360), mRNA
BnaC08g44040D	--	--	Molecular Function: receptor binding (GO:0005102);; Cellular Component: mitochondrion (GO:0005739);; Biological Process: signal transduction (GO:0007165);; Cellular Component: apoplast (GO:0048046);;	--	--	--	--	CLE20p (Precursor) GN=CLE20 OS=Arabidopsis thaliana (Mouse-ear cress) PE=2 SV=1	BnaC08g44040D protein {ECO:0000313|EMBL:CDY10047.1} OS=Brassica napus (Rape) PE=4 SV=1	BnaC08g44040D [Brassica napus]	Brassica rapa subsp. pekinensis clone KBrB017P15, complete sequence
BnaA09g44780D	[KAD]	--	Molecular Function: DNA binding (GO:0003677);; Molecular Function: chromatin binding (GO:0003682);; Molecular Function: sequence-specific DNA binding transcription factor activity (GO:0003700);; Cellular Component: nucleus (GO:0005634);; Biological Process: regulation of transcription, DNA-templated (GO:0006355);; Biological Process: response to abscisic acid (GO:0009737);; Biological Process: re…	K09422|1e-149|ath:AT1G17950|MYB52	[K]	Transcription	Myb-like DNA-binding domain;; Myb-like DNA-binding domain	Transcription factor MYB44 GN=K8K14.2 OS=Arabidopsis thaliana (Mouse-ear cress) PE=2 SV=1	BnaA09g44780D protein {ECO:0000313|EMBL:CDY21727.1} OS=Brassica napus (Rape) PE=4 SV=1	BnaA09g44780D [Brassica napus]	PREDICTED: Brassica rapa transcription factor MYB44-like (LOC103842728), mRNA
BnaC08g43820D	--	--	Molecular Function: sequence-specific DNA binding transcription factor activity (GO:0003700);; Cellular Component: nucleus (GO:0005634);; Biological Process: regulation of transcription, DNA-templated (GO:0006355);; Biological Process: auxin-activated signaling pathway (GO:0009734);; Biological Process: response to brassinosteroid (GO:0009741);; Molecular Function: protein dimerization activity (…	K14484|1e-113|ath:AT1G04240|SHY2	--	--	AUX/IAA family	Auxin-responsive protein IAA3 GN=F19P19.32 OS=Arabidopsis thaliana (Mouse-ear cress) PE=1 SV=1	Auxin-responsive protein {ECO:0000256|RuleBase:RU004549} OS=Brassica napus (Rape) PE=3 SV=1	BnaC08g43820D [Brassica napus]	PREDICTED: Brassica rapa auxin-responsive protein IAA3 (LOC103843664), mRNA
BnaC08g37160D	[KAD]	--	Biological Process: MAPK cascade (GO:0000165);; Molecular Function: DNA binding (GO:0003677);; Molecular Function: chromatin binding (GO:0003682);; Molecular Function: sequence-specific DNA binding transcription factor activity (GO:0003700);; Cellular Component: nucleus (GO:0005634);; Biological Process: regulation of transcription, DNA-templated (GO:0006355);; Biological Process: protein targeti…	K09422|1e-171|ath:AT1G18570|MYB51	[K]	Transcription	Myb-like DNA-binding domain;; Myb-like DNA-binding domain	Transcription factor MYB51 GN=F25I16.9 OS=Arabidopsis thaliana (Mouse-ear cress) PE=1 SV=2	BnaC08g37160D protein {ECO:0000313|EMBL:CDX81885.1} OS=Brassica napus (Rape) PE=4 SV=1	BnaC08g37160D [Brassica napus]	PREDICTED: Brassica rapa transcription factor MYB51-like (LOC103842694), mRNA
BnaA09g44480D	--	--	--	--	--	--	Domain of unknown function (DUF1985);; Ulp1 protease family, C-terminal catalytic domain	SART-1 family protein DOT2 {ECO:0000305} OS=Arabidopsis thaliana (Mouse-ear cress) PE=1 SV=1	BnaA09g44480D protein {ECO:0000313|EMBL:CDY21697.1} OS=Brassica napus (Rape) PE=4 SV=1	BnaA09g44480D [Brassica napus]	PREDICTED: Brassica rapa uncharacterized LOC103863887 (LOC103863887), mRNA
BnaA09g44390D	[S]	Function unknown	Biological Process: iron ion transport (GO:0006826);; Biological Process: cellular response to iron ion starvation (GO:0010106);; Biological Process: response to nitrate (GO:0010167);; Biological Process: nitrate transport (GO:0015706);; Molecular Function: manganese ion binding (GO:0030145);; Molecular Function: nutrient reservoir activity (GO:0045735);; Cellular Component: apoplast (GO:0048046)…	--	--	--	Cupin;; Cupin domain	Germin-like protein subfamily T member 2 (Precursor) GN=At1g18980 OS=Arabidopsis thaliana (Mouse-ear cress) PE=2 SV=1	BnaA09g44390D protein {ECO:0000313|EMBL:CDY21688.1} OS=Brassica napus (Rape) PE=4 SV=1	BnaA09g44390D [Brassica napus]	PREDICTED: Brassica rapa germin-like protein subfamily T member 2 (LOC103842671), mRNA
BnaA09g46440D	[P]	Inorganic ion transport and metabolism	Molecular Function: magnesium ion binding (GO:0000287);; Molecular Function: phospholipid-translocating ATPase activity (GO:0004012);; Molecular Function: calmodulin binding (GO:0005516);; Molecular Function: ATP binding (GO:0005524);; Cellular Component: plasma membrane (GO:0005886);; Biological Process: cation transport (GO:0006812);; Molecular Function: ATPase activity, coupled to transmembran…	K01530|0.0|ath:AT1G13210|ACA.l	[R]	General function prediction only	E1-E2 ATPase;; haloacid dehalogenase-like hydrolase;; haloacid dehalogenase-like hydrolase;; Putative hydrolase of sodium-potassium ATPase alpha subunit	Putative phospholipid-transporting ATPase 11 GN=ALA11 OS=Arabidopsis thaliana (Mouse-ear cress) PE=2 SV=1	BnaA09g46440D protein {ECO:0000313|EMBL:CDY26633.1} OS=Brassica napus (Rape) PE=4 SV=1	BnaA09g46440D [Brassica napus]	PREDICTED: Brassica rapa putative phospholipid-transporting ATPase 11 (LOC103843067), mRNA
BnaA09g48520D	--	--	--	--	--	--	Plant self-incompatibility protein S1	--	BnaA09g48520D protein {ECO:0000313|EMBL:CDY06351.1} OS=Brassica napus (Rape) PE=4 SV=1	PREDICTED: uncharacterized protein LOC103843359 [Brassica rapa]	PREDICTED: Brassica rapa uncharacterized LOC103843359 (LOC103843359), mRNA
BnaC08g41680D	--	--	Cellular Component: plasma membrane (GO:0005886);; Cellular Component: plant-type cell wall (GO:0009505);; Cellular Component: chloroplast (GO:0009507);; Molecular Function: carbohydrate binding (GO:0030246);; Cellular Component: apoplast (GO:0048046);;	--	--	--	Legume lectin domain	Lectin-like protein At1g53080 (Precursor) GN=At1g53080 OS=Arabidopsis thaliana (Mouse-ear cress) PE=2 SV=1	BnaC08g41680D protein {ECO:0000313|EMBL:CDY34609.1} OS=Brassica napus (Rape) PE=4 SV=1	BnaC08g41680D [Brassica napus]	PREDICTED: Brassica rapa lectin-like protein At1g53080 (LOC103843211), mRNA
BnaA09g43840D	[J]	Translation, ribosomal structure and biogenesis	--	K03243|1e-53|ath:AT1G76810|eukaryotic translation initiation factor 2 family protein / eIF-2 family protein	[J]	Translation, ribosomal structure and biogenesis	Translation-initiation factor 2;; Elongation factor Tu domain 4	--	BnaA09g43840D protein {ECO:0000313|EMBL:CDY13882.1} OS=Brassica napus (Rape) PE=4 SV=1	PREDICTED: eukaryotic translation initiation factor 5B-like [Brassica rapa]	PREDICTED: Brassica rapa eukaryotic translation initiation factor 5B-like (LOC103842611), mRNA
BnaC08g42510D	--	--	Molecular Function: acid phosphatase activity (GO:0003993);; Cellular Component: extracellular region (GO:0005576);; Cellular Component: vacuolar membrane (GO:0005774);; Cellular Component: endoplasmic reticulum (GO:0005783);; Biological Process: dephosphorylation (GO:0016311);;	--	[R]	General function prediction only	Histidine phosphatase superfamily (branch 2)	--	BnaC08g42510D protein {ECO:0000313|EMBL:CDY22617.1} OS=Brassica napus (Rape) PE=4 SV=1	BnaC08g42510D [Brassica napus]	PREDICTED: Brassica rapa multiple inositol polyphosphate phosphatase 1-like (LOC103843331), mRNA
BnaA09g47040D	[RTKL]	--	Molecular Function: protein serine/threonine kinase activity (GO:0004674);; Molecular Function: ATP binding (GO:0005524);; Cellular Component: nucleus (GO:0005634);; Biological Process: protein autophosphorylation (GO:0046777);;	--	[T]	Signal transduction mechanisms	Protein kinase domain;; Protein tyrosine kinase;; PhoP regulatory network protein YrbL	Calcium-dependent protein kinase 34 GN=CPK34 OS=Arabidopsis thaliana (Mouse-ear cress) PE=2 SV=1	BnaA09g47040D protein {ECO:0000313|EMBL:CDY26573.1} OS=Brassica napus (Rape) PE=4 SV=1	BnaA09g47040D [Brassica napus]	PREDICTED: Brassica rapa calcium-dependent protein kinase 26-like (LOC103843117), mRNA
BnaC08g39720D	--	--	--	--	--	--	--	--	BnaC08g39720D protein {ECO:0000313|EMBL:CDX81629.1} OS=Brassica napus (Rape) PE=4 SV=1	BnaC08g39720D [Brassica napus]	PREDICTED: Brassica rapa 60S ribosomal protein L10-1 (LOC103842977), mRNA
BnaC08g40970D	--	--	Cellular Component: mitochondrion (GO:0005739);;	--	[R]	General function prediction only	PPR repeat family;; PPR repeat;; PPR repeat;; Pentatricopeptide repeat domain;; Mitochondrial 28S ribosomal protein S27;; Tetratricopeptide repeat	Pentatricopeptide repeat-containing protein At1g12300, mitochondrial (Precursor) GN=At1g12300 OS=Arabidopsis thaliana (Mouse-ear cress) PE=2 SV=1	BnaC08g40970D protein {ECO:0000313|EMBL:CDY16026.1} OS=Brassica napus (Rape) PE=4 SV=1	BnaC08g40970D [Brassica napus]	PREDICTED: Brassica rapa pentatricopeptide repeat-containing protein At1g12300, mitochondrial-like (LOC103843108), transcript variant X2, mRNA
BnaA09g50540D	[R]	General function prediction only	Cellular Component: cytoplasm (GO:0005737);; Biological Process: chlorophyll catabolic process (GO:0015996);; Molecular Function: oxidoreductase activity, acting on paired donors, with incorporation or reduction of molecular oxygen, 2-oxoglutarate as one donor, and incorporation of one atom each of oxygen into both donors (GO:0016706);; Biological Process: oxidation-reduction process (GO:0055114)…	--	[QR]	--	2OG-Fe(II) oxygenase superfamily;; non-haem dioxygenase in morphine synthesis N-terminal	1-aminocyclopropane-1-carboxylate oxidase homolog 6 GN=At1g04350 OS=Arabidopsis thaliana (Mouse-ear cress) PE=2 SV=1	BnaA09g50540D protein {ECO:0000313|EMBL:CDY32542.1} OS=Brassica napus (Rape) PE=3 SV=1	BnaA09g50540D [Brassica napus]	PREDICTED: Brassica rapa 1-aminocyclopropane-1-carboxylate oxidase homolog 6-like (LOC103843658), mRNA
BnaA09g42000D	[H]	Coenzyme transport and metabolism	Molecular Function: nicotinate-nucleotide diphosphorylase (carboxylating) activity (GO:0004514);; Molecular Function: nicotinate phosphoribosyltransferase activity (GO:0004516);; Cellular Component: cytoplasm (GO:0005737);; Biological Process: NAD biosynthetic process (GO:0009435);; Biological Process: nicotinate nucleotide salvage (GO:0019358);;	K00763|0.0|ath:AT2G23420|NAPRT2	[H]	Coenzyme transport and metabolism	Nicotinate phosphoribosyltransferase (NAPRTase) family	--	BnaA09g42000D protein {ECO:0000313|EMBL:CDY46076.1} OS=Brassica napus (Rape) PE=4 SV=1	PREDICTED: nicotinate phosphoribosyltransferase [Brassica rapa]	PREDICTED: Brassica rapa nicotinate phosphoribosyltransferase (LOC103842415), mRNA
BnaC08g43450D	[J]	Translation, ribosomal structure and biogenesis	Molecular Function: translation elongation factor activity (GO:0003746);; Molecular Function: GTPase activity (GO:0003924);; Molecular Function: calmodulin binding (GO:0005516);; Molecular Function: GTP binding (GO:0005525);; Cellular Component: nucleolus (GO:0005730);; Cellular Component: mitochondrion (GO:0005739);; Cellular Component: vacuolar membrane (GO:0005774);; Cellular Component: Golgi …	K03231|0.0|ath:AT1G07920|elongation factor 1-alpha / EF-1-alpha	[J]	Translation, ribosomal structure and biogenesis	Elongation factor Tu GTP binding domain;; Elongation factor Tu C-terminal domain;; Elongation factor Tu domain 2;; Signal recognition particle receptor beta subunit	Elongation factor 1-alpha 4 GN=A4 OS=Arabidopsis thaliana (Mouse-ear cress) PE=1 SV=2	Elongation factor 1-alpha {ECO:0000256|RuleBase:RU004060} OS=Brassica rapa subsp. pekinensis (Chinese cabbage) PE=3 SV=1	BnaC08g43440D [Brassica napus]	Brassica oleracea var. botrytis cultivar qingnong elongation factor 1-alpha protein mRNA, complete cds
BnaC08g34840D	[Q]	Secondary metabolites biosynthesis, transport and catabolism	Cellular Component: extracellular region (GO:0005576);; Cellular Component: plasmodesma (GO:0009506);; Molecular Function: oxygen binding (GO:0019825);; Biological Process: lateral root development (GO:0048527);; Biological Process: developmental growth (GO:0048589);; Biological Process: root hair cell differentiation (GO:0048765);;	--	[Q]	Secondary metabolites biosynthesis, transport and catabolism	Cytochrome P450	Cytochrome P450 705A20 GN=CYP705A20 OS=Arabidopsis thaliana (Mouse-ear cress) PE=2 SV=1	BnaC08g34840D protein {ECO:0000313|EMBL:CDX76898.1} OS=Brassica napus (Rape) PE=3 SV=1	BnaC08g34840D [Brassica napus]	PREDICTED: Brassica rapa cytochrome P450 705A20-like (LOC103842459), mRNA
BnaC08g38930D	--	--	Cellular Component: nucleus (GO:0005634);; Cellular Component: chloroplast (GO:0009507);;	--	--	--	Protein of unknown function (DUF4050)	--	BnaC08g38930D protein {ECO:0000313|EMBL:CDX81708.1} OS=Brassica napus (Rape) PE=4 SV=1	BnaC08g38930D [Brassica napus]	PREDICTED: Brassica rapa uncharacterized LOC103842908 (LOC103842908), transcript variant X2, mRNA
BnaA09g50350D	--	--	Cellular Component: nucleus (GO:0005634);; Biological Process: negative regulation of transcription, DNA-templated (GO:0045892);;	--	--	--	Transcriptional repressor, ovate	Transcription repressor OFP12 GN=OFP12 OS=Arabidopsis thaliana (Mouse-ear cress) PE=1 SV=1	BnaA09g50350D protein {ECO:0000313|EMBL:CDY06168.1} OS=Brassica napus (Rape) PE=4 SV=1	BnaA09g50350D [Brassica napus]	PREDICTED: Brassica rapa transcription repressor OFP12-like (LOC103843602), mRNA
BnaA09g46020D	--	--	--	--	--	--	YqaJ-like viral recombinase domain	--	BnaA09g46020D protein {ECO:0000313|EMBL:CDY33796.1} OS=Brassica napus (Rape) PE=4 SV=1	BnaA09g46020D [Brassica napus]	PREDICTED: Brassica rapa uncharacterized LOC103843028 (LOC103843028), mRNA
BnaA09g47590D	[V]	Defense mechanisms	Cellular Component: plasma membrane (GO:0005886);; Biological Process: drug transmembrane transport (GO:0006855);; Cellular Component: chloroplast (GO:0009507);; Biological Process: response to salt stress (GO:0009651);; Biological Process: jasmonic acid metabolic process (GO:0009694);; Biological Process: response to abscisic acid (GO:0009737);; Biological Process: response to jasmonic acid (GO:…	--	[R]	General function prediction only	MatE	Protein TRANSPARENT TESTA 12 GN=F17J16_80 OS=Arabidopsis thaliana (Mouse-ear cress) PE=2 SV=1	MATE efflux family protein {ECO:0000256|RuleBase:RU004914} OS=Brassica napus (Rape) PE=3 SV=1	BnaA09g47590D [Brassica napus]	PREDICTED: Brassica rapa protein TRANSPARENT TESTA 12 (LOC103843230), mRNA
BnaA09g47290D	[G]	Carbohydrate transport and metabolism	Cellular Component: plant-type vacuole (GO:0000325);; Molecular Function: sucrose alpha-glucosidase activity (GO:0004575);; Biological Process: carbohydrate metabolic process (GO:0005975);; Biological Process: polyamine catabolic process (GO:0006598);; Biological Process: calcium ion transport (GO:0006816);; Biological Process: iron ion transport (GO:0006826);; Biological Process: Golgi organizat…	K01193|0.0|ath:AT1G12240|ATBETAFRUCT4	[G]	Carbohydrate transport and metabolism	Glycosyl hydrolases family 32 N-terminal domain;; Domain of unknown function (DUF3357);; Glycosyl hydrolases family 32 C terminal	Acid beta-fructofuranosidase 4, vacuolar (Precursor) GN=T28K15.3 OS=Arabidopsis thaliana (Mouse-ear cress) PE=2 SV=2	BnaA09g47290D protein {ECO:0000313|EMBL:CDY26548.1} OS=Brassica napus (Rape) PE=4 SV=1	BnaA09g47290D [Brassica napus]	PREDICTED: Brassica rapa acid beta-fructofuranosidase 4, vacuolar (LOC103843145), mRNA
BnaA09g46000D	[F]	Nucleotide transport and metabolism	Molecular Function: calmodulin binding (GO:0005516);; Cellular Component: endoplasmic reticulum (GO:0005783);; Biological Process: tRNA modification (GO:0006400);; Biological Process: meristem structural organization (GO:0009933);; Molecular Function: purine nucleotide binding (GO:0017076);; Biological Process: seed development (GO:0048316);; Biological Process: leaf development (GO:0048366);; Bi…	--	[R]	General function prediction only	Chromatin associated protein KTI12;; AAA domain;; AAA domain;; AAA domain	--	BnaA09g46000D protein {ECO:0000313|EMBL:CDY33794.1} OS=Brassica napus (Rape) PE=4 SV=1	BnaA09g46000D [Brassica napus]	PREDICTED: Brassica rapa protein KTI12 homolog (LOC103843020), transcript variant X2, mRNA
BnaC08g41070D	--	--	Molecular Function: sequence-specific DNA binding transcription factor activity (GO:0003700);; Cellular Component: nucleus (GO:0005634);; Biological Process: regulation of transcription, DNA-templated (GO:0006355);; Biological Process: response to heat (GO:0009408);; Biological Process: response to water deprivation (GO:0009414);; Biological Process: response to salt stress (GO:0009651);; Biologi…	--	--	--	AP2 domain	Dehydration-responsive element-binding protein 1F GN=T12C24.14 OS=Arabidopsis thaliana (Mouse-ear cress) PE=2 SV=1	BnaC08g41070D protein {ECO:0000313|EMBL:CDY16016.1} OS=Brassica napus (Rape) PE=4 SV=1	BnaC08g41070D [Brassica napus]	Brassica rapa subsp. chinensis CBF6A mRNA, complete cds
BnaA09g46110D	--	--	--	--	--	--	FBD;; F-box domain	F-box/FBD/LRR-repeat protein At1g13780 GN=At1g13780 OS=Arabidopsis thaliana (Mouse-ear cress) PE=2 SV=1	BnaA09g46110D protein {ECO:0000313|EMBL:CDY33805.1} OS=Brassica napus (Rape) PE=4 SV=1	BnaA09g46110D [Brassica napus]	PREDICTED: Brassica rapa F-box/FBD/LRR-repeat protein At1g13780-like (LOC103843029), transcript variant X2, mRNA
BnaC08g37020D	--	--	Cellular Component: vacuole (GO:0005773);;	--	--	--	--	Protein IQ-DOMAIN 31 GN=IQD31 OS=Arabidopsis thaliana (Mouse-ear cress) PE=1 SV=1	BnaC08g37020D protein {ECO:0000313|EMBL:CDX81899.1} OS=Brassica napus (Rape) PE=4 SV=1	BnaC08g37020D [Brassica napus]	Capsella rubella hypothetical protein (CARUB_v10008698mg) mRNA, complete cds
BnaA09g45580D	[GER]	--	Molecular Function: UDP-glucose transmembrane transporter activity (GO:0005460);; Biological Process: protein folding (GO:0006457);; Biological Process: response to heat (GO:0009408);; Biological Process: embryo sac development (GO:0009553);; Biological Process: pollen development (GO:0009555);; Biological Process: systemic acquired resistance (GO:0009627);; Biological Process: response to high l…	--	[G]	Carbohydrate transport and metabolism	UAA transporter family;; EamA-like transporter family	UDP-galactose/UDP-glucose transporter 3 GN=F14L17.13 OS=Arabidopsis thaliana (Mouse-ear cress) PE=1 SV=1	BnaA09g45580D protein {ECO:0000313|EMBL:CDY33752.1} OS=Brassica napus (Rape) PE=4 SV=1	PREDICTED: UDP-galactose/UDP-glucose transporter 3-like [Brassica rapa]	PREDICTED: Brassica rapa UDP-galactose/UDP-glucose transporter 3-like (LOC103842973), mRNA
BnaC08g34430D	--	--	Molecular Function: carboxylic ester hydrolase activity (GO:0004091);; Cellular Component: extracellular region (GO:0005576);; Biological Process: lipid metabolic process (GO:0006629);;	--	--	--	GDSL-like Lipase/Acylhydrolase	GDSL esterase/lipase At2g23540 (Precursor) GN=At2g23540 OS=Arabidopsis thaliana (Mouse-ear cress) PE=2 SV=1	BnaC08g34430D protein {ECO:0000313|EMBL:CDX76857.1} OS=Brassica napus (Rape) PE=4 SV=1	BnaC08g34430D [Brassica napus]	PREDICTED: Brassica rapa GDSL esterase/lipase At2g23540-like (LOC103842407), mRNA
BnaA09g42160D	[P]	Inorganic ion transport and metabolism	Cellular Component: ubiquitin ligase complex (GO:0000151);; Molecular Function: ubiquitin-protein ligase activity (GO:0004842);; Cellular Component: nucleus (GO:0005634);; Cellular Component: kinesin complex (GO:0005871);; Biological Process: protein ubiquitination (GO:0016567);; Molecular Function: kinesin binding (GO:0019894);;	--	[S]	Function unknown	Natural resistance-associated macrophage protein;; Armadillo/beta-catenin-like repeat;; U-box domain;; HEAT repeats	U-box domain-containing protein 4 GN=PUB4 OS=Arabidopsis thaliana (Mouse-ear cress) PE=1 SV=3	BnaA09g42160D protein {ECO:0000313|EMBL:CDY46092.1} OS=Brassica napus (Rape) PE=4 SV=1	BnaA09g42160D [Brassica napus]	PREDICTED: Brassica rapa U-box domain-containing protein 4 (LOC103842428), mRNA
BnaC08g41460D	--	--	Molecular Function: G-protein coupled receptor binding (GO:0001664);; Molecular Function: GTPase activity (GO:0003924);; Molecular Function: signal transducer activity (GO:0004871);; Molecular Function: GTP binding (GO:0005525);; Cellular Component: nucleus (GO:0005634);; Cellular Component: heterotrimeric G-protein complex (GO:0005834);; Biological Process: GTP catabolic process (GO:0006184);; B…	--	[DT]	--	--	Extra-large guanine nucleotide-binding protein 2 GN=XLG2 OS=Arabidopsis thaliana (Mouse-ear cress) PE=1 SV=1	BnaC08g41460D protein {ECO:0000313|EMBL:CDY15977.1} OS=Brassica napus (Rape) PE=4 SV=1	BnaC08g41460D [Brassica napus]	Eutrema salsugineum hypothetical protein (EUTSA_v10024380mg) mRNA, complete cds
BnaA09g44560D	--	--	Cellular Component: extracellular region (GO:0005576);; Cellular Component: nucleus (GO:0005634);; Cellular Component: mitochondrion (GO:0005739);; Cellular Component: vacuole (GO:0005773);; Cellular Component: cytosol (GO:0005829);; Molecular Function: zinc ion binding (GO:0008270);;	--	--	--	Transmembrane Fragile-X-F protein;; Zinc finger, C3HC4 type (RING finger)	Probable BOI-related E3 ubiquitin-protein ligase 3 GN=BRG3 OS=Arabidopsis thaliana (Mouse-ear cress) PE=1 SV=1	BnaA09g44560D protein {ECO:0000313|EMBL:CDY21705.1} OS=Brassica napus (Rape) PE=4 SV=1	BnaA09g44560D [Brassica napus]	PREDICTED: Brassica rapa uncharacterized LOC103842699 (LOC103842699), mRNA
BnaC08g35140D	[J]	Translation, ribosomal structure and biogenesis	Molecular Function: RNA binding (GO:0003723);; Cellular Component: nucleus (GO:0005634);; Molecular Function: tRNA (cytosine-5-)-methyltransferase activity (GO:0016428);; Biological Process: methylation (GO:0032259);;	--	[J]	Translation, ribosomal structure and biogenesis	NOL1/NOP2/sun family	--	BnaC08g35140D protein {ECO:0000313|EMBL:CDX76928.1} OS=Brassica napus (Rape) PE=4 SV=1	BnaC08g35140D [Brassica napus]	PREDICTED: Brassica rapa tRNA (cytosine(34)-C(5))-methyltransferase (LOC103864345), transcript variant X2, mRNA
BnaC08g38560D	--	--	Cellular Component: mitochondrion (GO:0005739);;	--	[V]	Defense mechanisms	Fungal domain of unknown function (DUF1712)	--	BnaC08g38560D protein {ECO:0000313|EMBL:CDX81745.1} OS=Brassica napus (Rape) PE=4 SV=1	BnaC08g38560D [Brassica napus]	PREDICTED: Brassica rapa vacuolar fusion protein CCZ1 homolog (LOC103842868), transcript variant X1, mRNA
BnaA09g42440D	--	--	Molecular Function: RNA binding (GO:0003723);; Cellular Component: nucleus (GO:0005634);;	--	[AR]	--	KH domain;; KH domain;; KH domain;; KH domain	KH domain-containing protein At4g18375 GN=At4g18375 OS=Arabidopsis thaliana (Mouse-ear cress) PE=2 SV=1	BnaA09g42440D protein {ECO:0000313|EMBL:CDY13742.1} OS=Brassica napus (Rape) PE=4 SV=1	BnaA09g42440D [Brassica napus]	PREDICTED: Brassica rapa KH domain-containing protein At4g18375-like (LOC103837876), mRNA
BnaC08g37430D	[RTKL]	--	Biological Process: nuclear division (GO:0000280);; Biological Process: RNA splicing, via endonucleolytic cleavage and ligation (GO:0000394);; Biological Process: cytokinesis by cell plate formation (GO:0000911);; Molecular Function: protein serine/threonine kinase activity (GO:0004674);; Molecular Function: protein binding (GO:0005515);; Molecular Function: ATP binding (GO:0005524);; Cellular Co…	K02202|0.0|ath:AT1G18040|CDKD1	[DKL]	--	Protein kinase domain;; Protein tyrosine kinase;; Kinase-like	Cyclin-dependent kinase D-3 GN=CDKD-3 OS=Arabidopsis thaliana (Mouse-ear cress) PE=1 SV=1	BnaC08g37430D protein {ECO:0000313|EMBL:CDX81858.1} OS=Brassica napus (Rape) PE=4 SV=1	BnaC08g37430D [Brassica napus]	PREDICTED: Brassica rapa cyclin-dependent kinase D-3 (LOC103842721), mRNA
BnaA09g45540D	--	--	Biological Process: cytokinesis (GO:0000910);; Cellular Component: nucleus (GO:0005634);; Cellular Component: mitochondrion (GO:0005739);; Biological Process: microtubule nucleation (GO:0007020);; Biological Process: cell-cell signaling (GO:0007267);; Biological Process: pattern specification process (GO:0007389);; Molecular Function: microtubule binding (GO:0008017);; Cellular Component: phragmo…	--	[DZ]	--	Microtubule associated protein (MAP65/ASE1 family)	65-kDa microtubule-associated protein 7 GN=MAP65-7 OS=Arabidopsis thaliana (Mouse-ear cress) PE=2 SV=1	BnaA09g45540D protein {ECO:0000313|EMBL:CDY33748.1} OS=Brassica napus (Rape) PE=4 SV=1	BnaA09g45540D [Brassica napus]	PREDICTED: Brassica rapa 65-kDa microtubule-associated protein 7 (LOC103842950), transcript variant X2, mRNA
BnaC08g42030D	--	--	--	--	--	--	--	--	BnaC08g42030D protein {ECO:0000313|EMBL:CDY34644.1} OS=Brassica napus (Rape) PE=4 SV=1	BnaC08g42030D [Brassica napus]	PREDICTED: Brassica rapa nucleolin 1-like (LOC103843507), mRNA
BnaA09g44590D	[RTKL]	--	Biological Process: respiratory burst involved in defense response (GO:0002679);; Cellular Component: extracellular region (GO:0005576);; Cellular Component: plasma membrane (GO:0005886);; Biological Process: ER-nucleus signaling pathway (GO:0006984);; Biological Process: toxin catabolic process (GO:0009407);; Biological Process: response to chitin (GO:0010200);; Biological Process: response to c…	--	[T]	Signal transduction mechanisms	Protein kinase domain;; Protein tyrosine kinase;; Wall-associated receptor kinase C-terminal	Probable serine/threonine-protein kinase At1g18390 (Precursor) GN=At1g18390 OS=Arabidopsis thaliana (Mouse-ear cress) PE=2 SV=2	BnaA09g44590D protein {ECO:0000313|EMBL:CDY21708.1} OS=Brassica napus (Rape) PE=4 SV=1	BnaA09g44590D [Brassica napus]	PREDICTED: Brassica rapa probable serine/threonine-protein kinase At1g18390 (LOC103842703), mRNA
BnaA09g42200D	--	--	--	--	[G]	Carbohydrate transport and metabolism	Protein of unknown function (DUF791)	--	BnaA09g42200D protein {ECO:0000313|EMBL:CDY49447.1} OS=Brassica napus (Rape) PE=4 SV=1	BnaA09g42200D [Brassica napus]	PREDICTED: Brassica rapa molybdate-anion transporter-like (LOC103842443), mRNA
BnaA09g51060D	[O]	Posttranslational modification, protein turnover, chaperones	Molecular Function: protein binding (GO:0005515);; Molecular Function: ATP binding (GO:0005524);; Biological Process: ATP catabolic process (GO:0006200);; Biological Process: fatty acid beta-oxidation (GO:0006635);; Cellular Component: chloroplast (GO:0009507);; Biological Process: protein import into peroxisome matrix (GO:0016558);; Molecular Function: ATPase activity (GO:0016887);;	K13339|0.0|ath:AT1G03000|PEX6	[O]	Posttranslational modification, protein turnover, chaperones	ATPase family associated with various cellular activities (AAA);; AAA domain;; AAA domain (dynein-related subfamily);; AAA ATPase domain;; AAA domain;; Holliday junction DNA helicase ruvB N-terminus;; AAA domain;; Part of AAA domain;; AAA domain;; RNA helicase;; Rad17 cell cycle checkpoint protein	Peroxisome biogenesis protein 6 GN=PEX6 OS=Arabidopsis thaliana (Mouse-ear cress) PE=1 SV=1	BnaA09g51060D protein {ECO:0000313|EMBL:CDY32490.1} OS=Brassica napus (Rape) PE=3 SV=1	PREDICTED: peroxisome biogenesis protein 6-like [Brassica rapa]	PREDICTED: Brassica rapa peroxisome biogenesis protein 6-like (LOC103843715), mRNA
BnaC08g35680D	[H]	Coenzyme transport and metabolism	Molecular Function: protein binding (GO:0005515);; Molecular Function: ATP binding (GO:0005524);; Cellular Component: nucleus (GO:0005634);; Cellular Component: cytosol (GO:0005829);; Cellular Component: plasmodesma (GO:0009506);; Biological Process: embryo development ending in seed dormancy (GO:0009793);; Biological Process: protein sumoylation (GO:0016925);; Molecular Function: SUMO activating…	K10685|0.0|ath:AT2G21470|SAE2	[O]	Posttranslational modification, protein turnover, chaperones	ThiF family;; Repeat in ubiquitin-activating (UBA) protein;; Ubiquitin/SUMO-activating enzyme ubiquitin-like domain;; Ubiquitin-activating enzyme active site;; Shikimate / quinate 5-dehydrogenase	SUMO-activating enzyme subunit 2 GN=F3K23.23 OS=Arabidopsis thaliana (Mouse-ear cress) PE=1 SV=1	BnaC08g35680D protein {ECO:0000313|EMBL:CDX82033.1} OS=Brassica napus (Rape) PE=4 SV=1	BnaC08g35680D [Brassica napus]	PREDICTED: Brassica rapa SUMO-activating enzyme subunit 2-like (LOC103842524), mRNA
BnaC08g38700D	--	--	Cellular Component: nucleus (GO:0005634);; Biological Process: fatty acid metabolic process (GO:0006631);; Biological Process: response to salicylic acid (GO:0009751);; Biological Process: cellular biosynthetic process (GO:0044249);; Biological Process: organic substance biosynthetic process (GO:1901576);;	--	--	--	--	Mediator of RNA polymerase II transcription subunit 15a GN=F7H2.12 OS=Arabidopsis thaliana (Mouse-ear cress) PE=1 SV=1	BnaC08g38700D protein {ECO:0000313|EMBL:CDX81731.1} OS=Brassica napus (Rape) PE=4 SV=1	BnaC08g38700D [Brassica napus]	PREDICTED: Brassica rapa mediator of RNA polymerase II transcription subunit 15a-like (LOC103842885), transcript variant X4, mRNA
BnaC08g43600D	--	--	--	--	--	--	S locus-related glycoprotein 1 binding pollen coat protein (SLR1-BP)	Putative defensin-like protein 137 (Precursor) GN=LCR14 OS=Arabidopsis thaliana (Mouse-ear cress) PE=3 SV=1	BnaC08g43600D protein {ECO:0000313|EMBL:CDY10091.1} OS=Brassica napus (Rape) PE=4 SV=1	pollen coat protein, class &apos;A&apos;, 1 (PCP-A1) [Brassica oleracea var. alboglabra]	Brassica oleracea mRNA for pollen coat protein gene class-'A' no.1 (PCP-A1)
BnaA09g48230D	--	--	Molecular Function: GTPase activity (GO:0003924);; Molecular Function: GTP binding (GO:0005525);; Molecular Function: phospholipid binding (GO:0005543);; Cellular Component: vacuolar membrane (GO:0005774);; Cellular Component: Golgi apparatus (GO:0005794);; Cellular Component: cytosol (GO:0005829);; Cellular Component: plasma membrane (GO:0005886);; Biological Process: GTP catabolic process (GO:0…	--	[UR]	--	Dynamin family;; Dynamin central region;; PH domain;; Dynamin GTPase effector domain;; Pleckstrin homology domain;; Pleckstrin homology domain;; 50S ribosome-binding GTPase	Dynamin-2A GN=F14N23.17 OS=Arabidopsis thaliana (Mouse-ear cress) PE=1 SV=2	BnaA09g48230D protein {ECO:0000313|EMBL:CDY34897.1} OS=Brassica napus (Rape) PE=3 SV=1	PREDICTED: dynamin-2A [Brassica rapa]	PREDICTED: Brassica rapa dynamin-2A (LOC103843305), mRNA
BnaA09g50700D	--	--	Cellular Component: nucleus (GO:0005634);; Biological Process: embryo development ending in seed dormancy (GO:0009793);;	--	[S]	Function unknown	--	TATA box-binding protein-associated factor RNA polymerase I subunit B GN=T17M13 OS=Arabidopsis thaliana (Mouse-ear cress) PE=1 SV=1	BnaA09g50700D protein {ECO:0000313|EMBL:CDY32526.1} OS=Brassica napus (Rape) PE=4 SV=1	BnaA09g50700D [Brassica napus]	PREDICTED: Brassica rapa TATA box-binding protein-associated factor RNA polymerase I subunit B (LOC103843672), mRNA
BnaA09g48250D	[I]	Lipid transport and metabolism	Biological Process: polysaccharide biosynthetic process (GO:0000271);; Molecular Function: acetyl-CoA carboxylase activity (GO:0003989);; Molecular Function: biotin carboxylase activity (GO:0004075);; Molecular Function: ATP binding (GO:0005524);; Cellular Component: cytosol (GO:0005829);; Biological Process: acetyl-CoA metabolic process (GO:0006084);; Biological Process: fatty acid biosynthetic …	K01961|0.0|pop:POPTR_831870|hypothetical protein	[IE]	--	Carbamoyl-phosphate synthase L chain, ATP binding domain;; Biotin carboxylase C-terminal domain;; Carbamoyl-phosphate synthase L chain, N-terminal domain;; ATP-grasp domain;; ATP-grasp domain;; D-ala D-ala ligase C-terminus;; RimK-like ATP-grasp domain	Biotin carboxylase, chloroplastic (Precursor) GN=CAC2 OS=Arabidopsis thaliana (Mouse-ear cress) PE=1 SV=1	BnaA09g48250D protein {ECO:0000313|EMBL:CDY34899.1} OS=Brassica napus (Rape) PE=4 SV=1	BnaA09g48250D [Brassica napus]	PREDICTED: Brassica rapa biotin carboxylase, chloroplastic-like (LOC103843309), mRNA
BnaC08g37840D	--	--	Molecular Function: phosphatidylinositol-4,5-bisphosphate 5-phosphatase activity (GO:0004439);; Cellular Component: mitochondrion (GO:0005739);; Biological Process: inositol trisphosphate metabolic process (GO:0032957);; Biological Process: inositol phosphate dephosphorylation (GO:0046855);;	--	[I]	Lipid transport and metabolism	SacI homology domain	Phosphoinositide phosphatase SAC5 GN=SAC5 OS=Arabidopsis thaliana (Mouse-ear cress) PE=2 SV=1	BnaC08g37840D protein {ECO:0000313|EMBL:CDX81817.1} OS=Brassica napus (Rape) PE=4 SV=1	BnaC08g37840D [Brassica napus]	PREDICTED: Brassica rapa phosphoinositide phosphatase SAC5-like (LOC103842754), mRNA
BnaC08g43070D	--	--	Cellular Component: mitochondrion (GO:0005739);;	--	[R]	General function prediction only	PPR repeat;; PPR repeat family;; PPR repeat;; Pentatricopeptide repeat domain	Pentatricopeptide repeat-containing protein At1g08610 GN=At1g08610 OS=Arabidopsis thaliana (Mouse-ear cress) PE=2 SV=1	BnaC08g43070D protein {ECO:0000313|EMBL:CDY22673.1} OS=Brassica napus (Rape) PE=4 SV=1	BnaC08g43070D [Brassica napus]	PREDICTED: Brassica rapa pentatricopeptide repeat-containing protein At1g08610 (LOC103843389), transcript variant X3, mRNA
BnaA09g41480D	[LKJ]	--	Biological Process: karyogamy (GO:0000741);; Molecular Function: nucleic acid binding (GO:0003676);; Molecular Function: ATP binding (GO:0005524);; Cellular Component: nucleus (GO:0005634);; Molecular Function: ATP-dependent helicase activity (GO:0008026);; Molecular Function: zinc ion binding (GO:0008270);; Biological Process: embryo sac egg cell differentiation (GO:0009560);;	K13116|2e-64|ath:AT5G51280|DEAD-box protein abstrakt, putative	[A]	RNA processing and modification	--	DEAD-box ATP-dependent RNA helicase 35 GN=RH35 OS=Arabidopsis thaliana (Mouse-ear cress) PE=2 SV=1	BnaA09g41480D protein {ECO:0000313|EMBL:CDY34781.1} OS=Brassica napus (Rape) PE=4 SV=1	BnaA09g41480D [Brassica napus]	PREDICTED: Brassica rapa DEAD-box ATP-dependent RNA helicase 35-like (LOC103842431), mRNA
BnaA09g50300D	--	--	--	--	[P]	Inorganic ion transport and metabolism	Domain of unknown function (DUF966)	Type I inositol 1,4,5-trisphosphate 5-phosphatase CVP2 GN=CVP2 OS=Arabidopsis thaliana (Mouse-ear cress) PE=1 SV=2	BnaA09g50300D protein {ECO:0000313|EMBL:CDY06173.1} OS=Brassica napus (Rape) PE=4 SV=1	BnaA09g50300D [Brassica napus]	PREDICTED: Brassica rapa uncharacterized LOC103843599 (LOC103843599), transcript variant X2, mRNA
BnaA09g45360D	--	--	Cellular Component: cytoplasm (GO:0005737);; Cellular Component: plasma membrane (GO:0005886);; Biological Process: response to oxidative stress (GO:0006979);;	--	--	--	PLAC8 family	Protein PLANT CADMIUM RESISTANCE 2 GN=PCR2 OS=Arabidopsis thaliana (Mouse-ear cress) PE=1 SV=1	BnaA09g45360D protein {ECO:0000313|EMBL:CDY33730.1} OS=Brassica napus (Rape) PE=4 SV=1	BnaA09g45360D [Brassica napus]	PREDICTED: Brassica rapa protein PLANT CADMIUM RESISTANCE 2-like (LOC103842931), mRNA
BnaA09g44050D	[P]	Inorganic ion transport and metabolism	Biological Process: sodium ion transport (GO:0006814);; Biological Process: lithium ion transport (GO:0010351);; Molecular Function: potassium:hydrogen antiporter activity (GO:0015386);; Cellular Component: integral component of membrane (GO:0016021);; Biological Process: potassium ion transmembrane transport (GO:0071805);;	--	[P]	Inorganic ion transport and metabolism	Sodium/hydrogen exchanger family	K(+) efflux antiporter 4 GN=KEA4 OS=Arabidopsis thaliana (Mouse-ear cress) PE=2 SV=2	BnaA09g44050D protein {ECO:0000313|EMBL:CDY21654.1} OS=Brassica napus (Rape) PE=4 SV=1	BnaA09g44050D [Brassica napus]	PREDICTED: Brassica rapa K(+) efflux antiporter 4 (LOC103842631), mRNA
BnaC08g41180D	--	--	Molecular Function: DNA binding (GO:0003677);; Cellular Component: nucleus (GO:0005634);; Molecular Function: zinc ion binding (GO:0008270);;	--	[R]	General function prediction only	AN1-like Zinc finger;; A20-like zinc finger	Zinc finger A20 and AN1 domain-containing stress-associated protein 1 GN=SAP1 OS=Arabidopsis thaliana (Mouse-ear cress) PE=1 SV=1	BnaC08g41180D protein {ECO:0000313|EMBL:CDY16005.1} OS=Brassica napus (Rape) PE=4 SV=1	BnaC08g41180D [Brassica napus]	PREDICTED: Brassica rapa zinc finger A20 and AN1 domain-containing stress-associated protein 1 (LOC103843126), mRNA
BnaC08g44280D	--	--	Biological Process: microtubule cytoskeleton organization (GO:0000226);; Molecular Function: C-8 sterol isomerase activity (GO:0000247);; Biological Process: cytokinesis by cell plate formation (GO:0000911);; Cellular Component: nucleus (GO:0005634);; Cellular Component: endoplasmic reticulum (GO:0005783);; Biological Process: DNA replication initiation (GO:0006270);; Biological Process: regulati…	--	--	--	--	--	BnaC08g44280D protein {ECO:0000313|EMBL:CDY10023.1} OS=Brassica napus (Rape) PE=4 SV=1	BnaC08g44280D [Brassica napus]	PREDICTED: Brassica rapa uncharacterized LOC103843601 (LOC103843601), mRNA
BnaA09g46510D	--	--	--	--	--	--	--	--	BnaC04g13480D protein {ECO:0000313|EMBL:CDY24743.1} OS=Brassica napus (Rape) PE=4 SV=1	BnaA06g33760D [Brassica napus]	PREDICTED: Brassica rapa uncharacterized LOC103843747 (LOC103843747), transcript variant X2, mRNA
BnaA09g50110D	[TZDR]	--	Molecular Function: calcium ion binding (GO:0005509);;	K13448|3e-44|ath:AT1G05990|calcium-binding protein, putative	[T]	Signal transduction mechanisms	EF hand;; EF-hand domain;; EF-hand domain pair;; EF hand;; EF-hand domain pair;; Secreted protein acidic and rich in cysteine Ca binding region	Calmodulin-like protein 7 GN=CML7 OS=Arabidopsis thaliana (Mouse-ear cress) PE=2 SV=1	BnaA09g50110D protein {ECO:0000313|EMBL:CDY06192.1} OS=Brassica napus (Rape) PE=4 SV=1	BnaA09g50110D [Brassica napus]	PREDICTED: Brassica rapa calmodulin-like protein 7 (LOC103843577), mRNA
BnaC08g42450D	[S]	Function unknown	Biological Process: response to molecule of bacterial origin (GO:0002237);; Molecular Function: protein serine/threonine kinase activity (GO:0004674);; Molecular Function: ATP binding (GO:0005524);; Cellular Component: plasma membrane (GO:0005886);; Biological Process: N-terminal protein myristoylation (GO:0006499);; Biological Process: protein targeting to membrane (GO:0006612);; Biological Proc…	--	--	--	Protein kinase domain;; Protein tyrosine kinase;; Leucine Rich repeats (2 copies);; Leucine rich repeat;; Leucine Rich Repeat;; Leucine rich repeat N-terminal domain;; Leucine rich repeat;; Leucine Rich repeat	Receptor-like protein kinase HAIKU2 (Precursor) GN=IKU2 OS=Arabidopsis thaliana (Mouse-ear cress) PE=1 SV=1	BnaC08g42450D protein {ECO:0000313|EMBL:CDY22611.1} OS=Brassica napus (Rape) PE=4 SV=1	BnaC08g42450D [Brassica napus]	PREDICTED: Brassica rapa receptor-like protein kinase HAIKU2 (LOC103843324), mRNA
BnaA09g43610D	[M]	Cell wall/membrane/envelope biogenesis	Molecular Function: structural molecule activity (GO:0005198);; Cellular Component: nucleus (GO:0005634);; Cellular Component: cytosol (GO:0005829);; Biological Process: N-terminal protein myristoylation (GO:0006499);; Biological Process: intracellular protein transport (GO:0006886);; Biological Process: ER to Golgi vesicle-mediated transport (GO:0006888);; Biological Process: Golgi organization …	--	--	--	Clathrin light chain	Clathrin light chain 1 GN=At2g20760 OS=Arabidopsis thaliana (Mouse-ear cress) PE=2 SV=1	BnaA09g43610D protein {ECO:0000313|EMBL:CDY13859.1} OS=Brassica napus (Rape) PE=4 SV=1	PREDICTED: clathrin light chain 1-like [Brassica rapa]	PREDICTED: Brassica rapa clathrin light chain 1-like (LOC103842584), mRNA
BnaC08g41800D	--	--	--	--	--	--	--	Leucine-rich repeat extensin-like protein 3 (Precursor) GN=LRX3 OS=Arabidopsis thaliana (Mouse-ear cress) PE=1 SV=1	BnaC08g41800D protein {ECO:0000313|EMBL:CDY34621.1} OS=Brassica napus (Rape) PE=4 SV=1	BnaC08g41800D [Brassica napus]	PREDICTED: Brassica rapa acanthoscurrin-1 (LOC103843221), mRNA
BnaA09g46890D	--	--	--	--	[R]	General function prediction only	PPR repeat family;; PPR repeat;; PPR repeat;; Pentatricopeptide repeat domain;; Tetratricopeptide repeat;; Tetratricopeptide repeat;; Replication factor C C-terminal domain	Pentatricopeptide repeat-containing protein At3g22470, mitochondrial (Precursor) GN=At3g22470 OS=Arabidopsis thaliana (Mouse-ear cress) PE=2 SV=1	BnaA09g46890D protein {ECO:0000313|EMBL:CDY26588.1} OS=Brassica napus (Rape) PE=4 SV=1	BnaA09g46890D [Brassica napus]	PREDICTED: Brassica rapa pentatricopeptide repeat-containing protein At1g12620-like (LOC103843127), transcript variant X1, mRNA
BnaA09g48570D	--	--	Cellular Component: protein storage vacuole (GO:0000326);; Molecular Function: protein binding (GO:0005515);; Cellular Component: endoplasmic reticulum (GO:0005783);; Cellular Component: plasma membrane (GO:0005886);; Biological Process: protein targeting to membrane (GO:0006612);; Biological Process: protein targeting to vacuole (GO:0006623);; Biological Process: nucleotide transport (GO:0006862…	--	--	--	C2 domain	Glycine-rich protein A3 OS=Daucus carota (Wild carrot) PE=2 SV=1	BnaA09g48570D protein {ECO:0000313|EMBL:CDY06346.1} OS=Brassica napus (Rape) PE=4 SV=1	BnaA09g48570D [Brassica napus]	PREDICTED: Brassica rapa basic salivary proline-rich protein 2 (LOC103843362), mRNA
BnaA09g45020D	--	--	Molecular Function: DNA binding (GO:0003677);; Molecular Function: sequence-specific DNA binding transcription factor activity (GO:0003700);; Cellular Component: nucleus (GO:0005634);; Biological Process: regulation of transcription, DNA-templated (GO:0006355);; Molecular Function: protein dimerization activity (GO:0046983);;	--	[K]	Transcription	SRF-type transcription factor (DNA-binding and dimerisation domain)	Agamous-like MADS-box protein AGL61 GN=F27C12.24 OS=Arabidopsis thaliana (Mouse-ear cress) PE=1 SV=1	BnaA09g45020D protein {ECO:0000313|EMBL:CDY21751.1} OS=Brassica napus (Rape) PE=4 SV=1	BnaA09g45020D [Brassica napus]	PREDICTED: Brassica rapa agamous-like MADS-box protein AGL61 (LOC103842796), mRNA
BnaA09g44290D	--	--	Molecular Function: DNA binding (GO:0003677);; Molecular Function: sequence-specific DNA binding transcription factor activity (GO:0003700);; Cellular Component: nucleus (GO:0005634);; Biological Process: regulation of transcription, DNA-templated (GO:0006355);; Biological Process: response to chitin (GO:0010200);;	--	--	--	AP2 domain	Ethylene-responsive transcription factor ERF017 GN=ERF017 OS=Arabidopsis thaliana (Mouse-ear cress) PE=2 SV=1	BnaA09g44290D protein {ECO:0000313|EMBL:CDY21678.1} OS=Brassica napus (Rape) PE=4 SV=1	BnaA09g44290D [Brassica napus]	PREDICTED: Brassica rapa ethylene-responsive transcription factor ERF017-like (LOC103842657), mRNA
BnaA09g50170D	[O]	Posttranslational modification, protein turnover, chaperones	Molecular Function: ATP binding (GO:0005524);; Cellular Component: nucleus (GO:0005634);; Molecular Function: nucleoside-triphosphatase activity (GO:0017111);;	--	[O]	Posttranslational modification, protein turnover, chaperones	ATPase family associated with various cellular activities (AAA);; Bromodomain;; IstB-like ATP binding protein;; AAA domain (Cdc48 subfamily);; AAA domain (dynein-related subfamily)	ATPase family AAA domain-containing protein At1g05910 GN=At1g05910 OS=Arabidopsis thaliana (Mouse-ear cress) PE=2 SV=1	BnaA09g50170D protein {ECO:0000313|EMBL:CDY06186.1} OS=Brassica napus (Rape) PE=3 SV=1	BnaA09g50170D [Brassica napus]	PREDICTED: Brassica rapa ATPase family AAA domain-containing protein At1g05910-like (LOC103843581), mRNA
BnaA09g50250D	[T]	Signal transduction mechanisms	Cellular Component: nucleus (GO:0005634);; Cellular Component: cytoplasm (GO:0005737);; Biological Process: response to nutrient (GO:0007584);; Biological Process: response to wounding (GO:0009611);; Biological Process: response to blue light (GO:0009637);; Biological Process: response to abscisic acid (GO:0009737);; Biological Process: plant-type cell wall modification (GO:0009827);; Biological …	--	[U]	Intracellular trafficking, secretion, and vesicular transport	Endonuclease/Exonuclease/phosphatase family	Type I inositol 1,4,5-trisphosphate 5-phosphatase 13 GN=F3F20.8 OS=Arabidopsis thaliana (Mouse-ear cress) PE=1 SV=1	BnaA09g50250D protein {ECO:0000313|EMBL:CDY06178.1} OS=Brassica napus (Rape) PE=4 SV=1	BnaA09g50250D [Brassica napus]	PREDICTED: Brassica rapa type I inositol 1,4,5-trisphosphate 5-phosphatase 13-like (LOC103843594), transcript variant X1, mRNA
BnaC08g39330D	[D]	Cell cycle control, cell division, chromosome partitioning	Biological Process: double-strand break repair via homologous recombination (GO:0000724);; Molecular Function: cyclin-dependent protein serine/threonine kinase activity (GO:0004693);; Cellular Component: nucleus (GO:0005634);; Biological Process: stomatal lineage progression (GO:0010440);; Biological Process: chiasma assembly (GO:0051026);; Biological Process: regulation of cell cycle (GO:0051726…	--	[D]	Cell cycle control, cell division, chromosome partitioning	Cyclin, N-terminal domain;; Cyclin, C-terminal domain	Cyclin-SDS GN=SDS OS=Arabidopsis thaliana (Mouse-ear cress) PE=1 SV=2	BnaC08g39330D protein {ECO:0000313|EMBL:CDX81668.1} OS=Brassica napus (Rape) PE=3 SV=1	BnaC08g39330D [Brassica napus]	PREDICTED: Brassica rapa cyclin-SDS-like (LOC103842946), mRNA
BnaC08g40220D	--	--	Biological Process: microtubule cytoskeleton organization (GO:0000226);; Biological Process: cytokinesis by cell plate formation (GO:0000911);; Biological Process: nuclear-transcribed mRNA catabolic process (GO:0000956);; Cellular Component: nucleus (GO:0005634);; Cellular Component: cytoplasm (GO:0005737);; Biological Process: regulation of transcription, DNA-templated (GO:0006355);; Biological …	--	[R]	General function prediction only	--	Topless-related protein 2 GN=TPR2 OS=Arabidopsis thaliana (Mouse-ear cress) PE=1 SV=2	Uncharacterized protein {ECO:0000313|EnsemblPlants:Bra037598.1-P} OS=Brassica rapa subsp. pekinensis (Chinese cabbage) PE=4 SV=1	BnaA07g39190D [Brassica napus]	PREDICTED: Brassica rapa uncharacterized LOC103842712 (LOC103842712), ncRNA
BnaA09g48090D	--	--	Cellular Component: cytoplasm (GO:0005737);; Biological Process: response to auxin (GO:0009733);;	K14487|1e-171|ath:AT1G48660|auxin-responsive GH3 family protein	--	--	GH3 auxin-responsive promoter	4-substituted benzoates-glutamate ligase GH3.12 OS=Arabidopsis thaliana (Mouse-ear cress) PE=1 SV=1	BnaA09g48090D protein {ECO:0000313|EMBL:CDY34883.1} OS=Brassica napus (Rape) PE=4 SV=1	BnaA09g48090D [Brassica napus]	PREDICTED: Brassica rapa 4-substituted benzoates-glutamate ligase GH3.12-like (LOC103843293), transcript variant X1, mRNA
BnaA09g46940D	--	--	--	--	[R]	General function prediction only	--	Pentatricopeptide repeat-containing protein At3g22470, mitochondrial (Precursor) GN=At3g22470 OS=Arabidopsis thaliana (Mouse-ear cress) PE=2 SV=1	BnaA09g46940D protein {ECO:0000313|EMBL:CDY26583.1} OS=Brassica napus (Rape) PE=4 SV=1	BnaA09g46940D [Brassica napus]	PREDICTED: Brassica rapa pentatricopeptide repeat-containing protein At1g12300, mitochondrial-like (LOC103843108), transcript variant X2, mRNA
BnaC08g42050D	[OC]	--	Molecular Function: protein disulfide isomerase activity (GO:0003756);; Cellular Component: cytosol (GO:0005829);; Biological Process: protein folding (GO:0006457);; Biological Process: phosphatidylinositol biosynthetic process (GO:0006661);; Biological Process: glycerol ether metabolic process (GO:0006662);; Molecular Function: electron carrier activity (GO:0009055);; Molecular Function: protein…	--	[O]	Posttranslational modification, protein turnover, chaperones	Thioredoxin	Thioredoxin-like protein CXXS1 GN=CXXS1 OS=Arabidopsis thaliana (Mouse-ear cress) PE=2 SV=2	BnaC08g42050D protein {ECO:0000313|EMBL:CDY34646.1} OS=Brassica napus (Rape) PE=4 SV=1	BnaC08g42050D [Brassica napus]	PREDICTED: Brassica rapa thioredoxin-like protein CXXS1 (LOC103843239), mRNA
BnaA09g46760D	--	--	Cellular Component: nucleus (GO:0005634);; Biological Process: transport (GO:0006810);;	--	[YU]	--	Exportin 1-like protein	--	BnaA09g46760D protein {ECO:0000313|EMBL:CDY26601.1} OS=Brassica napus (Rape) PE=4 SV=1	BnaA09g46760D [Brassica napus]	PREDICTED: Brassica rapa importin-13 (LOC103843094), transcript variant X1, mRNA
BnaC08g42860D	[M]	Cell wall/membrane/envelope biogenesis	Cellular Component: Golgi apparatus (GO:0005794);; Biological Process: starch metabolic process (GO:0005982);; Biological Process: iron ion transport (GO:0006826);; Biological Process: biosynthetic process (GO:0009058);; Biological Process: cellular response to iron ion starvation (GO:0010106);; Biological Process: response to nitrate (GO:0010167);; Molecular Function: glucuronosyltransferase act…	--	[G]	Carbohydrate transport and metabolism	Glycosyl transferase family 8	Putative UDP-glucuronate:xylan alpha-glucuronosyltransferase 5 GN=F7G19.14 OS=Arabidopsis thaliana (Mouse-ear cress) PE=2 SV=1	BnaC08g42860D protein {ECO:0000313|EMBL:CDY22652.1} OS=Brassica napus (Rape) PE=4 SV=1	BnaC08g42860D [Brassica napus]	PREDICTED: Brassica rapa putative UDP-glucuronate:xylan alpha-glucuronosyltransferase 5 (LOC103843365), mRNA
BnaC08g37320D	[O]	Posttranslational modification, protein turnover, chaperones	Cellular Component: mitochondrial inner membrane presequence translocase complex (GO:0005744);; Cellular Component: chloroplast (GO:0009507);; Biological Process: embryo development ending in seed dormancy (GO:0009793);; Biological Process: protein transport (GO:0015031);; Molecular Function: P-P-bond-hydrolysis-driven protein transmembrane transporter activity (GO:0015450);; Cellular Component: …	--	[U]	Intracellular trafficking, secretion, and vesicular transport	Tim17/Tim22/Tim23/Pmp24 family	Mitochondrial import inner membrane translocase subunit TIM22-1 (Precursor) GN=T22K18.6 OS=Arabidopsis thaliana (Mouse-ear cress) PE=1 SV=1	BnaC08g37320D protein {ECO:0000313|EMBL:CDX81869.1} OS=Brassica napus (Rape) PE=4 SV=1	BnaC08g37320D [Brassica napus]	PREDICTED: Brassica rapa mitochondrial import inner membrane translocase subunit TIM22-4 (LOC103842705), mRNA
BnaA09g46140D	[R]	General function prediction only	Cellular Component: vacuolar membrane (GO:0005774);; Cellular Component: plasma membrane (GO:0005886);; Cellular Component: plasmodesma (GO:0009506);; Biological Process: response to auxin (GO:0009733);; Molecular Function: FMN binding (GO:0010181);; Molecular Function: oxidoreductase activity, acting on NAD(P)H, quinone or similar compound as acceptor (GO:0016655);; Biological Process: oxidation…	--	[R]	General function prediction only	--	Probable NAD(P)H dehydrogenase (quinone) FQR1-like 1 {ECO:0000305} OS=Arabidopsis thaliana (Mouse-ear cress) PE=2 SV=1	BnaA09g46140D protein {ECO:0000313|EMBL:CDY26663.1} OS=Brassica napus (Rape) PE=4 SV=1	BnaA09g46140D [Brassica napus]	PREDICTED: Brassica rapa flavoprotein-like protein YCP4 (LOC103834330), mRNA
BnaC08g37490D	--	--	Molecular Function: sequence-specific DNA binding transcription factor activity (GO:0003700);; Molecular Function: protein binding (GO:0005515);; Cellular Component: nucleus (GO:0005634);; Biological Process: regulation of transcription, DNA-templated (GO:0006355);; Biological Process: response to salt stress (GO:0009651);;	K01527|3e-98|ath:AT1G17880|nascent polypeptide-associated complex (NAC) domain-containing protein / BTF3b-like transcription factor, putative	[K]	Transcription	NAC domain	Nascent polypeptide-associated complex subunit alpha-like protein 3 GN=At5g13850 OS=Arabidopsis thaliana (Mouse-ear cress) PE=1 SV=1	BnaC08g37490D protein {ECO:0000313|EMBL:CDX81852.1} OS=Brassica napus (Rape) PE=4 SV=1	BnaC08g37490D [Brassica napus]	PREDICTED: Brassica rapa transcription factor BTF3 homolog 4-like (LOC103842730), mRNA
BnaC08g37760D	--	--	Molecular Function: iron ion binding (GO:0005506);; Cellular Component: chloroplast (GO:0009507);; Biological Process: pollen development (GO:0009555);; Biological Process: response to wounding (GO:0009611);; Biological Process: response to bacterium (GO:0009617);; Biological Process: response to fungus (GO:0009620);; Biological Process: response to high light intensity (GO:0009644);; Biological …	K00454|0.0|ath:AT1G17420|LOX3	--	--	Lipoxygenase;; PLAT/LH2 domain	Lipoxygenase 3, chloroplastic (Precursor) GN=LOX3 OS=Arabidopsis thaliana (Mouse-ear cress) PE=2 SV=1	Lipoxygenase {ECO:0000256|RuleBase:RU003975} OS=Brassica napus (Rape) PE=3 SV=1	BnaC08g37760D [Brassica napus]	PREDICTED: Brassica rapa lipoxygenase 3, chloroplastic (LOC103842751), mRNA
BnaC08g37260D	--	--	--	--	[R]	General function prediction only	PPR repeat family;; PPR repeat;; PPR repeat	Pentatricopeptide repeat-containing protein At1g12620 GN=At1g12620 OS=Arabidopsis thaliana (Mouse-ear cress) PE=2 SV=1	BnaC08g37260D protein {ECO:0000313|EMBL:CDX81875.1} OS=Brassica napus (Rape) PE=4 SV=1	BnaC08g37260D [Brassica napus]	Brassica rapa clone P2 hypothetical protein genes, complete cds; and hypothetical protein gene, partial cds
BnaA09g42370D	--	--	Molecular Function: DNA binding (GO:0003677);; Molecular Function: sequence-specific DNA binding transcription factor activity (GO:0003700);; Cellular Component: nucleus (GO:0005634);; Biological Process: regulation of transcription, DNA-templated (GO:0006355);; Molecular Function: protein dimerization activity (GO:0046983);;	--	--	--	Helix-loop-helix DNA-binding domain	Transcription factor bHLH19 GN=T30L20.2 OS=Arabidopsis thaliana (Mouse-ear cress) PE=2 SV=1	BnaA09g42370D protein {ECO:0000313|EMBL:CDY13735.1} OS=Brassica napus (Rape) PE=4 SV=1	BnaA09g42370D [Brassica napus]	PREDICTED: Brassica rapa transcription factor bHLH19-like (LOC103842465), mRNA
BnaC08g34960D	--	--	Cellular Component: nucleus (GO:0005634);;	--	--	--	--	--	BnaC08g34960D protein {ECO:0000313|EMBL:CDX76910.1} OS=Brassica napus (Rape) PE=4 SV=1	BnaC08g34960D [Brassica napus]	Brassica rapa subsp. pekinensis clone KBrH070I10, complete sequence
BnaA09g43420D	--	--	Cellular Component: extracellular region (GO:0005576);; Biological Process: defense response (GO:0006952);;	--	--	--	Dirigent-like protein	Dirigent protein 4 (Precursor) GN=DIR4 OS=Arabidopsis thaliana (Mouse-ear cress) PE=2 SV=1	BnaA09g43420D protein {ECO:0000313|EMBL:CDY13840.1} OS=Brassica napus (Rape) PE=4 SV=1	BnaA09g43420D [Brassica napus]	PREDICTED: Brassica rapa dirigent protein 4 (LOC103842557), mRNA
BnaA09g42350D	[I]	Lipid transport and metabolism	Biological Process: respiratory burst involved in defense response (GO:0002679);; Molecular Function: SNAP receptor activity (GO:0005484);; Cellular Component: mitochondrion (GO:0005739);; Cellular Component: vacuolar membrane (GO:0005774);; Cellular Component: trans-Golgi network (GO:0005802);; Cellular Component: cytosol (GO:0005829);; Cellular Component: plasma membrane (GO:0005886);; Biologic…	--	[I]	Lipid transport and metabolism	Prenyltransferase-like;; Prenyltransferase-like;; Prenyltransferase and squalene oxidase repeat;; Pectic acid lyase	Seco-amyrin synthase GN=PEN6 OS=Arabidopsis thaliana (Mouse-ear cress) PE=1 SV=1	BnaA09g42350D protein {ECO:0000313|EMBL:CDY49432.1} OS=Brassica napus (Rape) PE=4 SV=1	BnaA09g42350D [Brassica napus]	PREDICTED: Brassica rapa seco-amyrin synthase-like (LOC103842460), mRNA
BnaC08g44320D	--	--	--	--	[P]	Inorganic ion transport and metabolism	Domain of unknown function (DUF966)	Protein UPSTREAM OF FLC GN=UFC OS=Arabidopsis thaliana (Mouse-ear cress) PE=2 SV=1	BnaC08g44320D protein {ECO:0000313|EMBL:CDY10019.1} OS=Brassica napus (Rape) PE=4 SV=1	BnaC08g44320D [Brassica napus]	PREDICTED: Brassica rapa uncharacterized LOC103843599 (LOC103843599), transcript variant X2, mRNA
BnaC08g40560D	--	--	Molecular Function: ATP binding (GO:0005524);; Biological Process: defense response (GO:0006952);; Molecular Function: nucleoside-triphosphatase activity (GO:0017111);; Molecular Function: ADP binding (GO:0043531);;	--	[T]	Signal transduction mechanisms	NB-ARC domain	Disease resistance protein RFL1 GN=RFL1 OS=Arabidopsis thaliana (Mouse-ear cress) PE=3 SV=2	BnaC08g40560D protein {ECO:0000313|EMBL:CDY16067.1} OS=Brassica napus (Rape) PE=4 SV=1	BnaC08g40560D [Brassica napus]	PREDICTED: Brassica rapa disease resistance protein RFL1-like (LOC103843141), mRNA
BnaA09g50470D	[S]	Function unknown	Biological Process: defense response (GO:0006952);; Biological Process: signal transduction (GO:0007165);; Biological Process: regulation of cellular metabolic process (GO:0031323);;	--	[R]	General function prediction only	Leucine Rich repeats (2 copies);; Leucine rich repeat;; Leucine Rich Repeat;; Leucine Rich repeat;; Leucine rich repeat	Receptor-like protein 12 (Precursor) GN=RLP12 OS=Arabidopsis thaliana (Mouse-ear cress) PE=2 SV=2	BnaA09g50470D protein {ECO:0000313|EMBL:CDY06156.1} OS=Brassica napus (Rape) PE=4 SV=1	BnaA09g50470D [Brassica napus]	Brassica rapa subsp. pekinensis clone KBrB017P15, complete sequence
BnaC08g34300D	[S]	Function unknown	Cellular Component: chloroplast thylakoid membrane (GO:0009535);; Cellular Component: chloroplast stroma (GO:0009570);; Cellular Component: chloroplast envelope (GO:0009941);; Biological Process: methylglyoxal catabolic process to D-lactate (GO:0019243);;	--	--	--	YbaB/EbfC DNA-binding family	--	BnaC08g34300D protein {ECO:0000313|EMBL:CDX76844.1} OS=Brassica napus (Rape) PE=4 SV=1	BnaC08g34300D [Brassica napus]	PREDICTED: Brassica rapa uncharacterized LOC103842388 (LOC103842388), mRNA
BnaA09g44130D	[L]	Replication, recombination and repair	Molecular Function: DNA binding (GO:0003677);; Cellular Component: mitochondrion (GO:0005739);; Biological Process: DNA repair (GO:0006281);; Biological Process: DNA recombination (GO:0006310);; Molecular Function: DNA-dependent ATPase activity (GO:0008094);; Biological Process: SOS response (GO:0009432);;	K03553|0.0|ath:AT2G19490|recA family protein	[L]	Replication, recombination and repair	recA bacterial DNA recombination protein;; Rad51;; AAA domain;; KaiC	DNA repair protein recA homolog 3, mitochondrial (Precursor) GN=At2g19490 OS=Arabidopsis thaliana (Mouse-ear cress) PE=2 SV=2	BnaA09g44130D protein {ECO:0000313|EMBL:CDY21662.1} OS=Brassica napus (Rape) PE=3 SV=1	BnaA09g44130D [Brassica napus]	PREDICTED: Brassica rapa DNA repair protein recA homolog 3, mitochondrial-like (LOC103842639), mRNA
BnaA09g47760D	--	--	Biological Process: pollen tube growth (GO:0009860);; Molecular Function: pectinesterase activity (GO:0030599);; Biological Process: negative regulation of catalytic activity (GO:0043086);; Molecular Function: pectinesterase inhibitor activity (GO:0046910);;	--	--	--	Plant invertase/pectin methylesterase inhibitor	Pectinesterase 26 GN=MLN21.8 OS=Arabidopsis thaliana (Mouse-ear cress) PE=2 SV=1	BnaA09g47760D protein {ECO:0000313|EMBL:CDY34850.1} OS=Brassica napus (Rape) PE=4 SV=1	PREDICTED: uncharacterized protein LOC103843263 [Brassica rapa]	PREDICTED: Brassica rapa uncharacterized LOC103843263 (LOC103843263), mRNA
BnaC08g36890D	--	--	Molecular Function: ATP binding (GO:0005524);; Cellular Component: nucleus (GO:0005634);; Biological Process: ATP catabolic process (GO:0006200);; Biological Process: sister chromatid cohesion (GO:0007062);; Cellular Component: plasmodesma (GO:0009506);; Biological Process: determination of bilateral symmetry (GO:0009855);; Biological Process: organ morphogenesis (GO:0009887);; Cellular Component…	--	[D]	Cell cycle control, cell division, chromosome partitioning	Histidine kinase-, DNA gyrase B-, and HSP90-like ATPase;; Histidine kinase-, DNA gyrase B-, and HSP90-like ATPase	--	BnaC08g36890D protein {ECO:0000313|EMBL:CDX81912.1} OS=Brassica napus (Rape) PE=4 SV=1	BnaC08g36890D [Brassica napus]	PREDICTED: Brassica rapa MORC family CW-type zinc finger protein 3 (LOC103842666), transcript variant X2, mRNA
BnaC08g43150D	--	--	Molecular Function: sequence-specific DNA binding transcription factor activity (GO:0003700);; Cellular Component: nucleus (GO:0005634);; Biological Process: regulation of transcription, DNA-templated (GO:0006355);; Biological Process: abaxial cell fate specification (GO:0010158);;	--	--	--	YABBY protein;; HMG-box domain	Putative axial regulator YABBY 2 GN=YAB2 OS=Arabidopsis thaliana (Mouse-ear cress) PE=2 SV=1	BnaC08g43150D protein {ECO:0000313|EMBL:CDY22681.1} OS=Brassica napus (Rape) PE=4 SV=1	BnaC08g43150D [Brassica napus]	PREDICTED: Brassica rapa putative axial regulator YABBY 2 (LOC103843396), transcript variant X1, mRNA
BnaA09g45480D	[D]	Cell cycle control, cell division, chromosome partitioning	Biological Process: double-strand break repair via homologous recombination (GO:0000724);; Molecular Function: cyclin-dependent protein serine/threonine kinase activity (GO:0004693);; Cellular Component: nucleus (GO:0005634);; Biological Process: stomatal lineage progression (GO:0010440);; Biological Process: chiasma assembly (GO:0051026);; Biological Process: regulation of cell cycle (GO:0051726…	--	[D]	Cell cycle control, cell division, chromosome partitioning	Cyclin, N-terminal domain;; Cyclin, C-terminal domain	Cyclin-SDS GN=SDS OS=Arabidopsis thaliana (Mouse-ear cress) PE=1 SV=2	BnaA09g45480D protein {ECO:0000313|EMBL:CDY33742.1} OS=Brassica napus (Rape) PE=3 SV=1	BnaA09g45480D [Brassica napus]	PREDICTED: Brassica rapa cyclin-SDS-like (LOC103842946), mRNA
BnaC08g44080D	--	--	Cellular Component: nucleus (GO:0005634);; Biological Process: photorespiration (GO:0009853);;	--	--	--	--	--	BnaC08g44080D protein {ECO:0000313|EMBL:CDY10043.1} OS=Brassica napus (Rape) PE=4 SV=1	BnaC08g44080D [Brassica napus]	PREDICTED: Brassica rapa uncharacterized LOC103843621 (LOC103843621), mRNA
BnaA09g49560D	--	--	Biological Process: maltose metabolic process (GO:0000023);; Cellular Component: chloroplast (GO:0009507);; Biological Process: starch biosynthetic process (GO:0019252);;	--	--	--	Tetratricopeptide repeat;; TPR repeat;; Tetratricopeptide repeat;; Tetratricopeptide repeat;; Tetratricopeptide repeat	--	BnaA09g49560D protein {ECO:0000313|EMBL:CDY06247.1} OS=Brassica napus (Rape) PE=4 SV=1	PREDICTED: uncharacterized protein LOC103843466 [Brassica rapa]	PREDICTED: Brassica rapa uncharacterized LOC103843466 (LOC103843466), mRNA
BnaA09g50890D	[OC]	--	Biological Process: maltose metabolic process (GO:0000023);; Molecular Function: enzyme inhibitor activity (GO:0004857);; Biological Process: pentose-phosphate shunt (GO:0006098);; Biological Process: regulation of carbohydrate metabolic process (GO:0006109);; Biological Process: rRNA processing (GO:0006364);; Biological Process: glycerol ether metabolic process (GO:0006662);; Biological Process:…	--	[O]	Posttranslational modification, protein turnover, chaperones	Thioredoxin;; Thioredoxin-like domain	Thioredoxin M-type, chloroplastic (Precursor) OS=Brassica napus (Rape) PE=1 SV=1	BnaA09g50890D protein {ECO:0000313|EMBL:CDY32507.1} OS=Brassica napus (Rape) PE=4 SV=1	BnaA09g50890D [Brassica napus]	Brassica rapa subsp. pekinensis clone KBrB089B13, complete sequence
BnaA09g41530D	--	--	--	--	--	--	--	Probable F-box protein At5g04010 GN=NSFBx OS=Arabidopsis thaliana (Mouse-ear cress) PE=2 SV=1	BnaA09g41530D protein {ECO:0000313|EMBL:CDY34786.1} OS=Brassica napus (Rape) PE=4 SV=1	BnaA09g41530D [Brassica napus]	PREDICTED: Brassica rapa probable F-box protein At5g04010 (LOC103842371), mRNA
BnaC08g43230D	--	--	Molecular Function: DNA binding (GO:0003677);; Molecular Function: sequence-specific DNA binding transcription factor activity (GO:0003700);; Cellular Component: nucleus (GO:0005634);; Biological Process: response to mechanical stimulus (GO:0009612);; Biological Process: calcium-mediated signaling (GO:0019722);;	K14431|0.0|ath:AT1G08320|bZIP family transcription factor	--	--	Seed dormancy control;; bZIP transcription factor;; Basic region leucine zipper	TGACG-sequence-specific DNA-binding protein TGA-2.1 GN=TGA21 OS=Nicotiana tabacum (Common tobacco) PE=1 SV=1	BnaC08g43230D protein {ECO:0000313|EMBL:CDY22689.1} OS=Brassica napus (Rape) PE=4 SV=1	BnaC08g43230D [Brassica napus]	PREDICTED: Brassica rapa transcription factor TGA2-like (LOC103843404), transcript variant X2, mRNA
BnaC08g44140D	--	--	Molecular Function: peroxidase activity (GO:0004601);; Cellular Component: extracellular region (GO:0005576);; Cellular Component: endoplasmic reticulum (GO:0005783);; Biological Process: iron ion transport (GO:0006826);; Biological Process: response to oxidative stress (GO:0006979);; Biological Process: response to desiccation (GO:0009269);; Biological Process: response to cold (GO:0009409);; Bi…	K00430|0.0|ath:AT1G05260|RCI3	--	--	Peroxidase	Peroxidase 3 (Precursor) GN=YUP8H12.13 OS=Arabidopsis thaliana (Mouse-ear cress) PE=2 SV=1	BnaC08g44140D protein {ECO:0000313|EMBL:CDY10037.1} OS=Brassica napus (Rape) PE=3 SV=1	BnaC08g44140D [Brassica napus]	PREDICTED: Brassica rapa peroxidase 3-like (LOC103843616), mRNA
BnaA09g50230D	--	--	Cellular Component: mitochondrion (GO:0005739);;	--	[S]	Function unknown	Eukaryotic protein of unknown function (DUF842)	--	BnaA09g50230D protein {ECO:0000313|EMBL:CDY06180.1} OS=Brassica napus (Rape) PE=4 SV=1	BnaA09g50230D [Brassica napus]	PREDICTED: Brassica rapa protein FAM136A-like (LOC103843591), mRNA
BnaA09g42950D	[J]	Translation, ribosomal structure and biogenesis	Molecular Function: tRNA binding (GO:0000049);; Molecular Function: phenylalanine-tRNA ligase activity (GO:0004826);; Molecular Function: ATP binding (GO:0005524);; Cellular Component: cytosol (GO:0005829);; Biological Process: phenylalanyl-tRNA aminoacylation (GO:0006432);; Biological Process: nucleotide biosynthetic process (GO:0009165);;	K01889|0.0|ath:AT4G39280|phenylalanyl-tRNA synthetase, putative / phenylalanine--tRNA ligase, putative (EC:6.1.1.20)	[J]	Translation, ribosomal structure and biogenesis	tRNA synthetases class II core domain (F);; tRNA synthetases class II (D, K and N)	Probable phenylalanine--tRNA ligase alpha subunit GN=At4g39280 OS=Arabidopsis thaliana (Mouse-ear cress) PE=2 SV=3	BnaA09g42950D protein {ECO:0000313|EMBL:CDY13793.1} OS=Brassica napus (Rape) PE=3 SV=1	BnaA09g42950D [Brassica napus]	PREDICTED: Brassica rapa probable phenylalanine--tRNA ligase alpha subunit (LOC103842499), mRNA
BnaC08g41080D	[RTKL]	--	Molecular Function: protein serine/threonine kinase activity (GO:0004674);; Molecular Function: ATP binding (GO:0005524);; Cellular Component: nucleus (GO:0005634);; Biological Process: protein autophosphorylation (GO:0046777);;	--	[T]	Signal transduction mechanisms	Protein kinase domain;; Protein tyrosine kinase;; PhoP regulatory network protein YrbL	Calcium-dependent protein kinase 4 GN=CPK4 OS=Solanum tuberosum (Potato) PE=2 SV=1	BnaC08g41080D protein {ECO:0000313|EMBL:CDY16015.1} OS=Brassica napus (Rape) PE=4 SV=1	BnaC08g41080D [Brassica napus]	PREDICTED: Brassica rapa calcium-dependent protein kinase 26-like (LOC103843117), mRNA
BnaA09g44250D	[P]	Inorganic ion transport and metabolism	Molecular Function: N,N-dimethylaniline monooxygenase activity (GO:0004499);; Cellular Component: chloroplast (GO:0009507);; Biological Process: plant-type hypersensitive response (GO:0009626);; Biological Process: systemic acquired resistance (GO:0009627);; Biological Process: defense response signaling pathway, resistance gene-dependent (GO:0009870);; Biological Process: defense response signal…	--	[Q]	Secondary metabolites biosynthesis, transport and catabolism	Flavin-binding monooxygenase-like;; Pyridine nucleotide-disulphide oxidoreductase;; L-lysine 6-monooxygenase (NADPH-requiring);; Pyridine nucleotide-disulphide oxidoreductase;; NAD(P)-binding Rossmann-like domain;; FAD-NAD(P)-binding;; FAD dependent oxidoreductase;; Flavin containing amine oxidoreductase;; Thi4 family	Probable flavin-containing monooxygenase 1 GN=FMO1 OS=Arabidopsis thaliana (Mouse-ear cress) PE=2 SV=1	BnaA09g44250D protein {ECO:0000313|EMBL:CDY21674.1} OS=Brassica napus (Rape) PE=4 SV=1	BnaA09g44250D [Brassica napus]	PREDICTED: Brassica rapa probable flavin-containing monooxygenase 1 (LOC103842655), mRNA
BnaC08g39190D	--	--	--	--	--	--	PLAC8 family	Protein PLANT CADMIUM RESISTANCE 2 GN=PCR2 OS=Arabidopsis thaliana (Mouse-ear cress) PE=1 SV=1	BnaC08g39190D protein {ECO:0000313|EMBL:CDX81682.1} OS=Brassica napus (Rape) PE=4 SV=1	BnaC08g39190D [Brassica napus]	PREDICTED: Brassica rapa protein PLANT CADMIUM RESISTANCE 2-like (LOC103842931), mRNA
BnaA09g47450D	--	--	Molecular Function: aspartic-type endopeptidase activity (GO:0004190);; Cellular Component: extracellular region (GO:0005576);; Cellular Component: vacuole (GO:0005773);; Cellular Component: cytosol (GO:0005829);; Biological Process: glycolysis (GO:0006096);; Biological Process: proteolysis (GO:0006508);; Biological Process: protein targeting to vacuole (GO:0006623);; Biological Process: lipid me…	K08245|0.0|ath:AT1G11910|aspartyl protease family protein	[O]	Posttranslational modification, protein turnover, chaperones	Eukaryotic aspartyl protease;; Saposin-like type B, region 2;; Saposin-like type B, region 1;; Xylanase inhibitor N-terminal	Aspartic proteinase A1 (Precursor) GN=F12F1.24 OS=Arabidopsis thaliana (Mouse-ear cress) PE=1 SV=1	BnaA09g47450D protein {ECO:0000313|EMBL:CDY34819.1} OS=Brassica napus (Rape) PE=3 SV=1	BnaA09g47450D [Brassica napus]	Brassica rapa subsp. chinensis aspartic proteinase mRNA, complete cds
BnaA09g46620D	[Q]	Secondary metabolites biosynthesis, transport and catabolism	Molecular Function: monooxygenase activity (GO:0004497);; Molecular Function: iron ion binding (GO:0005506);; Molecular Function: electron carrier activity (GO:0009055);; Cellular Component: plasmodesma (GO:0009506);; Biological Process: response to nitrate (GO:0010167);; Biological Process: nitrate transport (GO:0015706);; Molecular Function: oxidoreductase activity, acting on paired donors, wit…	K00517|0.0|ath:AT1G13100|CYP71B29	[Q]	Secondary metabolites biosynthesis, transport and catabolism	Cytochrome P450	Cytochrome P450 71B29 GN=CYP71B29 OS=Arabidopsis thaliana (Mouse-ear cress) PE=3 SV=1	BnaA09g46620D protein {ECO:0000313|EMBL:CDY26615.1} OS=Brassica napus (Rape) PE=3 SV=1	BnaA09g46620D [Brassica napus]	PREDICTED: Brassica rapa cytochrome P450 71B29 (LOC103843079), mRNA
BnaA09g51430D	[R]	General function prediction only	Molecular Function: GTPase activity (GO:0003924);; Molecular Function: GTP binding (GO:0005525);; Cellular Component: chloroplast outer membrane (GO:0009707);; Molecular Function: P-P-bond-hydrolysis-driven protein transmembrane transporter activity (GO:0015450);; Molecular Function: protein homodimerization activity (GO:0042803);; Biological Process: protein targeting to chloroplast (GO:0045036)…	--	--	--	AIG1 family;; 50S ribosome-binding GTPase;; Protein of unknown function, DUF258;; Dynamin family	Translocase of chloroplast 33, chloroplastic GN=T7I23.11 OS=Arabidopsis thaliana (Mouse-ear cress) PE=1 SV=1	Translocase of chloroplast {ECO:0000256|PIRNR:PIRNR038134} OS=Brassica napus (Rape) PE=3 SV=1	PREDICTED: translocase of chloroplast 33, chloroplastic-like [Brassica rapa]	PREDICTED: Brassica rapa translocase of chloroplast 33, chloroplastic-like (LOC103843762), mRNA
BnaC08g40460D	--	--	--	--	--	--	--	--	BnaC08g40460D protein {ECO:0000313|EMBL:CDY16077.1} OS=Brassica napus (Rape) PE=4 SV=1	BnaC08g40460D [Brassica napus]	--
BnaC08g44300D	--	--	Cellular Component: cytoplasm (GO:0005737);; Biological Process: response to abscisic acid (GO:0009737);; Biological Process: auxin metabolic process (GO:0009850);; Biological Process: determination of bilateral symmetry (GO:0009855);; Biological Process: organ morphogenesis (GO:0009887);; Biological Process: polarity specification of adaxial/abaxial axis (GO:0009944);; Biological Process: merist…	--	[U]	Intracellular trafficking, secretion, and vesicular transport	--	Type I inositol 1,4,5-trisphosphate 5-phosphatase CVP2 GN=CVP2 OS=Arabidopsis thaliana (Mouse-ear cress) PE=1 SV=2	BnaC08g44300D protein {ECO:0000313|EMBL:CDY10021.1} OS=Brassica napus (Rape) PE=4 SV=1	BnaC08g44300D [Brassica napus]	PREDICTED: Camelina sativa type I inositol 1,4,5-trisphosphate 5-phosphatase CVP2 (LOC104763318), mRNA
BnaA09g47260D	--	--	Molecular Function: DNA binding (GO:0003677);; Molecular Function: sequence-specific DNA binding transcription factor activity (GO:0003700);; Cellular Component: nucleus (GO:0005634);; Biological Process: regulation of transcription, DNA-templated (GO:0006355);; Biological Process: embryo development ending in seed dormancy (GO:0009793);; Biological Process: cell wall biogenesis (GO:0042546);; Bi…	--	--	--	No apical meristem (NAM) protein	NAC domain-containing protein 7 GN=T28K15.1 OS=Arabidopsis thaliana (Mouse-ear cress) PE=2 SV=2	BnaA09g47260D protein {ECO:0000313|EMBL:CDY26551.1} OS=Brassica napus (Rape) PE=4 SV=1	BnaA09g47260D [Brassica napus]	PREDICTED: Brassica rapa NAC domain-containing protein 7 (LOC103836175), transcript variant X2, mRNA
BnaA09g48720D	[P]	Inorganic ion transport and metabolism	Molecular Function: superoxide dismutase activity (GO:0004784);; Molecular Function: copper ion binding (GO:0005507);; Molecular Function: protein binding (GO:0005515);; Cellular Component: extracellular region (GO:0005576);; Cellular Component: nucleus (GO:0005634);; Cellular Component: cytosol (GO:0005829);; Biological Process: gluconeogenesis (GO:0006094);; Biological Process: glycolysis (GO:0…	K04565|1e-104|ath:AT1G08830|CSD1	[P]	Inorganic ion transport and metabolism	Copper/zinc superoxide dismutase (SODC)	Superoxide dismutase [Cu-Zn] GN=SODCC OS=Brassica oleracea var. capitata (Cabbage) PE=1 SV=2	Superoxide dismutase [Cu-Zn] {ECO:0000256|RuleBase:RU000393} OS=Brassica rapa subsp. oleifera (Biennial turnip rape) PE=2 SV=1	PREDICTED: superoxide dismutase [Cu-Zn] [Brassica rapa]	Zea mays clone 20042 mRNA sequence
BnaA09g46800D	--	--	Cellular Component: vacuolar membrane (GO:0005774);;	--	--	--	F-box domain;; F-box associated	Putative F-box protein At1g12855 GN=At1g12855 OS=Arabidopsis thaliana (Mouse-ear cress) PE=3 SV=1	BnaA09g46800D protein {ECO:0000313|EMBL:CDY26597.1} OS=Brassica napus (Rape) PE=4 SV=1	PREDICTED: putative F-box protein At1g12855 isoform X1 [Brassica rapa]	PREDICTED: Brassica rapa putative F-box protein At1g12855 (LOC103843099), transcript variant X1, mRNA
BnaC08g39810D	--	--	Molecular Function: RNA binding (GO:0003723);; Cellular Component: cytoplasm (GO:0005737);; Biological Process: response to salt stress (GO:0009651);; Molecular Function: ribonuclease T2 activity (GO:0033897);;	K01166|1e-133|ath:AT1G14210|ribonuclease T2 family protein	[A]	RNA processing and modification	Ribonuclease T2 family	Ribonuclease 3 (Precursor) GN=RNS3 OS=Arabidopsis thaliana (Mouse-ear cress) PE=2 SV=1	BnaC08g39810D protein {ECO:0000313|EMBL:CDX81620.1} OS=Brassica napus (Rape) PE=3 SV=1	BnaC08g39810D [Brassica napus]	PREDICTED: Brassica rapa ribonuclease 1 (LOC103842993), mRNA
BnaC08g38800D	--	--	--	--	--	--	--	--	BnaC08g38800D protein {ECO:0000313|EMBL:CDX81721.1} OS=Brassica napus (Rape) PE=4 SV=1	BnaC08g38800D [Brassica napus]	--
BnaA09g50770D	--	--	Biological Process: nuclear-transcribed mRNA catabolic process (GO:0000956);; Cellular Component: nucleus (GO:0005634);; Biological Process: embryo development ending in seed dormancy (GO:0009793);; Biological Process: protein maturation (GO:0051604);;	--	[T]	Signal transduction mechanisms	Conserved mid region of cactin;; Cactus-binding C-terminus of cactin protein	Cactin GN=CTN OS=Arabidopsis thaliana (Mouse-ear cress) PE=1 SV=1	BnaA09g50770D protein {ECO:0000313|EMBL:CDY32519.1} OS=Brassica napus (Rape) PE=4 SV=1	BnaA09g50770D [Brassica napus]	PREDICTED: Brassica rapa cactin (LOC103843679), mRNA
BnaC08g35490D	--	--	Molecular Function: sequence-specific DNA binding transcription factor activity (GO:0003700);; Cellular Component: nucleus (GO:0005634);; Biological Process: regulation of transcription, DNA-templated (GO:0006355);; Molecular Function: sequence-specific DNA binding (GO:0043565);;	--	--	--	WRKY DNA -binding domain	Probable WRKY transcription factor 59 GN=WRKY59 OS=Arabidopsis thaliana (Mouse-ear cress) PE=2 SV=2	BnaC08g35490D protein {ECO:0000313|EMBL:CDX76963.1} OS=Brassica napus (Rape) PE=4 SV=1	BnaC08g35490D [Brassica napus]	PREDICTED: Brassica rapa probable WRKY transcription factor 59 (LOC103842491), mRNA
BnaA09g47130D	--	--	--	--	--	--	F-box associated domain	F-box protein At5g65850 GN=At5g65850 OS=Arabidopsis thaliana (Mouse-ear cress) PE=2 SV=1	BnaA09g47130D protein {ECO:0000313|EMBL:CDY26564.1} OS=Brassica napus (Rape) PE=4 SV=1	BnaA09g47130D [Brassica napus]	--
BnaA09g43350D	[U]	Intracellular trafficking, secretion, and vesicular transport	Molecular Function: receptor activity (GO:0004872);; Biological Process: protein retention in ER lumen (GO:0006621);; Biological Process: protein transport (GO:0015031);; Cellular Component: integral component of membrane (GO:0016021);; Molecular Function: ER retention sequence binding (GO:0046923);;	--	[U]	Intracellular trafficking, secretion, and vesicular transport	ER lumen protein retaining receptor	ER lumen protein-retaining receptor GN=ERD2 OS=Petunia hybrida (Petunia) PE=2 SV=1	BnaA09g43350D protein {ECO:0000313|EMBL:CDY13833.1} OS=Brassica napus (Rape) PE=4 SV=1	PREDICTED: putative ER lumen protein-retaining receptor C28H8.4 [Brassica rapa]	PREDICTED: Brassica rapa putative ER lumen protein-retaining receptor C28H8.4 (LOC103842549), mRNA
BnaC08g44120D	--	--	--	--	--	--	Peroxidase	Peroxidase 2 (Precursor) GN=YUP8H12.14 OS=Arabidopsis thaliana (Mouse-ear cress) PE=2 SV=1	BnaC08g44120D protein {ECO:0000313|EMBL:CDY10039.1} OS=Brassica napus (Rape) PE=3 SV=1	BnaC08g44120D [Brassica napus]	PREDICTED: Brassica rapa peroxidase 2-like (LOC103843617), mRNA
BnaC08g39820D	[J]	Translation, ribosomal structure and biogenesis	Molecular Function: structural constituent of ribosome (GO:0003735);; Cellular Component: ribosome (GO:0005840);; Biological Process: translation (GO:0006412);; Cellular Component: chloroplast (GO:0009507);;	--	[O]	Posttranslational modification, protein turnover, chaperones	Ribosomal L18p/L5e family	50S ribosomal protein L18, chloroplastic (Precursor) GN=RPL18 OS=Arabidopsis thaliana (Mouse-ear cress) PE=2 SV=1	BnaC08g39820D protein {ECO:0000313|EMBL:CDX81619.1} OS=Brassica napus (Rape) PE=4 SV=1	BnaC08g39820D [Brassica napus]	PREDICTED: Brassica rapa 50S ribosomal protein L18, chloroplastic (LOC103842991), mRNA
BnaC08g40990D	--	--	--	--	--	--	--	Thionin-like protein 2 (Precursor) GN=At1g12663 OS=Arabidopsis thaliana (Mouse-ear cress) PE=3 SV=1	BnaC08g40990D protein {ECO:0000313|EMBL:CDY16024.1} OS=Brassica napus (Rape) PE=4 SV=1	BnaC08g40990D [Brassica napus]	PREDICTED: Brassica rapa thionin-like protein 2 (LOC103843111), mRNA
BnaC08g36610D	--	--	Molecular Function: structural constituent of ribosome (GO:0003735);; Cellular Component: cell wall (GO:0005618);; Cellular Component: plasma membrane (GO:0005886);; Biological Process: translation (GO:0006412);; Cellular Component: plasmodesma (GO:0009506);; Cellular Component: chloroplast (GO:0009507);; Cellular Component: cytosolic large ribosomal subunit (GO:0022625);; Biological Process: rib…	K02903|4e-89|ath:AT2G19730|60S ribosomal protein L28 (RPL28A)	[J]	Translation, ribosomal structure and biogenesis	Ribosomal L28e protein family	60S ribosomal protein L28-1 GN=RPL28A OS=Arabidopsis thaliana (Mouse-ear cress) PE=2 SV=1	BnaC08g36610D protein {ECO:0000313|EMBL:CDX81940.1} OS=Brassica napus (Rape) PE=4 SV=1	BnaC08g36610D [Brassica napus]	PREDICTED: Brassica rapa 60S ribosomal protein L28-1 (LOC103842629), mRNA
BnaA09g43620D	[G]	Carbohydrate transport and metabolism	Molecular Function: hydrolase activity, hydrolyzing O-glycosyl compounds (GO:0004553);; Cellular Component: extracellular region (GO:0005576);; Biological Process: carbohydrate metabolic process (GO:0005975);; Biological Process: seed germination (GO:0009845);; Molecular Function: cation binding (GO:0043169);;	--	--	--	Cellulase (glycosyl hydrolase family 5);; Glycosyl hydrolase catalytic core;; Sugar-binding cellulase-like	Mannan endo-1,4-beta-mannosidase 2 (Precursor) GN=MAN2 OS=Arabidopsis thaliana (Mouse-ear cress) PE=2 SV=1	BnaA09g43620D protein {ECO:0000313|EMBL:CDY13860.1} OS=Brassica napus (Rape) PE=3 SV=1	PREDICTED: mannan endo-1,4-beta-mannosidase 2 [Brassica rapa]	PREDICTED: Brassica rapa mannan endo-1,4-beta-mannosidase 2 (LOC103842585), transcript variant X2, mRNA
BnaA09g48900D	[T]	Signal transduction mechanisms	Molecular Function: protein serine/threonine phosphatase activity (GO:0004722);; Molecular Function: iron ion binding (GO:0005506);; Cellular Component: nucleus (GO:0005634);; Cellular Component: cytosol (GO:0005829);; Cellular Component: plasma membrane (GO:0005886);; Molecular Function: manganese ion binding (GO:0030145);;	--	[R]	General function prediction only	Calcineurin-like phosphoesterase;; Galactose oxidase, central domain;; Galactose oxidase, central domain;; Kelch motif;; Kelch motif;; Kelch motif;; Kelch motif	Serine/threonine-protein phosphatase BSL2 GN=BSL2 OS=Arabidopsis thaliana (Mouse-ear cress) PE=1 SV=2	Serine/threonine-protein phosphatase {ECO:0000256|RuleBase:RU004273} OS=Brassica napus (Rape) PE=3 SV=1	BnaA09g48900D [Brassica napus]	PREDICTED: Brassica rapa serine/threonine-protein phosphatase BSL2 (LOC103843399), mRNA
BnaA09g41940D	--	--	Cellular Component: chloroplast (GO:0009507);;	--	--	--	Plant protein of unknown function (DUF936)	--	BnaA09g41940D protein {ECO:0000313|EMBL:CDY46070.1} OS=Brassica napus (Rape) PE=4 SV=1	BnaA09g41940D [Brassica napus]	PREDICTED: Brassica rapa uncharacterized LOC103867672 (LOC103867672), mRNA
BnaC08g42830D	--	--	Cellular Component: protein storage vacuole (GO:0000326);; Molecular Function: protein binding (GO:0005515);; Cellular Component: endoplasmic reticulum (GO:0005783);; Cellular Component: plasma membrane (GO:0005886);; Biological Process: protein targeting to membrane (GO:0006612);; Biological Process: protein targeting to vacuole (GO:0006623);; Biological Process: nucleotide transport (GO:0006862…	--	--	--	C2 domain	Glycine-rich protein A3 OS=Daucus carota (Wild carrot) PE=2 SV=1	BnaC08g42830D protein {ECO:0000313|EMBL:CDY22649.1} OS=Brassica napus (Rape) PE=4 SV=1	BnaC08g42830D [Brassica napus]	PREDICTED: Brassica rapa basic salivary proline-rich protein 2 (LOC103843362), mRNA
BnaA09g47630D	[RTKL]	--	Molecular Function: protein serine/threonine kinase activity (GO:0004674);; Molecular Function: protein tyrosine kinase activity (GO:0004713);; Molecular Function: ATP binding (GO:0005524);; Cellular Component: plasma membrane (GO:0005886);; Biological Process: protein phosphorylation (GO:0006468);; Molecular Function: carbohydrate binding (GO:0030246);; Biological Process: recognition of pollen …	--	--	--	Protein kinase domain;; Protein tyrosine kinase;; PAN-like domain;; Domain of unknown function (DUF3403)	G-type lectin S-receptor-like serine/threonine-protein kinase At1g11330 (Precursor) GN=At1g11330 OS=Arabidopsis thaliana (Mouse-ear cress) PE=2 SV=3	BnaA09g47630D protein {ECO:0000313|EMBL:CDY34837.1} OS=Brassica napus (Rape) PE=4 SV=1	BnaA09g47630D [Brassica napus]	PREDICTED: Brassica rapa uncharacterized LOC103843509 (LOC103843509), mRNA
BnaC08g35050D	--	--	Cellular Component: nucleus (GO:0005634);; Cellular Component: cytosol (GO:0005829);; Biological Process: response to blue light (GO:0009637);; Biological Process: trichome differentiation (GO:0010026);; Biological Process: regulation of stomatal movement (GO:0010119);; Biological Process: regulation of epidermal cell division (GO:0010482);; Biological Process: D-xylose metabolic process (GO:0042…	--	--	--	GRAM domain	GLABRA2 expression modulator GN=GEM OS=Arabidopsis thaliana (Mouse-ear cress) PE=1 SV=1	BnaC08g35050D protein {ECO:0000313|EMBL:CDX76919.1} OS=Brassica napus (Rape) PE=4 SV=1	BnaC08g35050D [Brassica napus]	PREDICTED: Brassica rapa GLABRA2 expression modulator (LOC103837890), mRNA
BnaC08g36600D	[J]	Translation, ribosomal structure and biogenesis	Molecular Function: structural constituent of ribosome (GO:0003735);; Cellular Component: cell wall (GO:0005618);; Cellular Component: plasma membrane (GO:0005886);; Biological Process: translation (GO:0006412);; Cellular Component: plasmodesma (GO:0009506);; Cellular Component: chloroplast (GO:0009507);; Cellular Component: cytosolic large ribosomal subunit (GO:0022625);; Biological Process: rib…	K02910|8e-80|ath:AT2G19740|60S ribosomal protein L31 (RPL31A)	[J]	Translation, ribosomal structure and biogenesis	Ribosomal protein L31e	60S ribosomal protein L31-1 GN=RPL31A OS=Arabidopsis thaliana (Mouse-ear cress) PE=3 SV=1	BnaC08g36600D protein {ECO:0000313|EMBL:CDX81941.1} OS=Brassica napus (Rape) PE=4 SV=1	BnaC08g36600D [Brassica napus]	PREDICTED: Brassica rapa 60S ribosomal protein L31-1 (LOC103842628), mRNA
BnaA09g42050D	--	--	Cellular Component: extracellular region (GO:0005576);; Cellular Component: mitochondrion (GO:0005739);; Biological Process: ethylene biosynthetic process (GO:0009693);; Biological Process: response to ethylene (GO:0009723);; Biological Process: cellular response to hypoxia (GO:0071456);; Biological Process: response to karrikin (GO:0080167);;	--	--	--	--	--	BnaA09g42050D protein {ECO:0000313|EMBL:CDY46081.1} OS=Brassica napus (Rape) PE=4 SV=1	BnaA09g42050D [Brassica napus]	PREDICTED: Brassica rapa uncharacterized LOC103842419 (LOC103842419), mRNA
BnaC08g36590D	--	--	Molecular Function: nucleic acid binding (GO:0003676);; Cellular Component: nucleus (GO:0005634);;	--	[R]	General function prediction only	G-patch domain;; DExH-box splicing factor binding site	SURP and G-patch domain-containing protein 1-like protein GN=At3g52120 OS=Arabidopsis thaliana (Mouse-ear cress) PE=2 SV=1	BnaC08g36590D protein {ECO:0000313|EMBL:CDX81942.1} OS=Brassica napus (Rape) PE=4 SV=1	BnaC08g36590D [Brassica napus]	PREDICTED: Brassica rapa G patch domain and ankyrin repeat-containing protein 1-like (LOC103842627), mRNA
BnaA09g51360D	--	--	Cellular Component: nucleus (GO:0005634);; Cellular Component: vacuolar membrane (GO:0005774);; Cellular Component: endoplasmic reticulum (GO:0005783);; Cellular Component: Golgi apparatus (GO:0005794);; Cellular Component: cytosol (GO:0005829);; Cellular Component: plasma membrane (GO:0005886);; Biological Process: pentose-phosphate shunt (GO:0006098);; Cellular Component: plasmodesma (GO:000950…	--	[S]	Function unknown	Uncharacterised conserved protein (DUF2359)	--	BnaA09g51360D protein {ECO:0000313|EMBL:CDY32460.1} OS=Brassica napus (Rape) PE=4 SV=1	BnaA09g51360D [Brassica napus]	PREDICTED: Brassica rapa uncharacterized LOC103843755 (LOC103843755), transcript variant X1, mRNA
BnaC08g42090D	[RTKL]	--	Molecular Function: protein serine/threonine kinase activity (GO:0004674);; Molecular Function: protein tyrosine kinase activity (GO:0004713);; Molecular Function: ATP binding (GO:0005524);; Cellular Component: plasma membrane (GO:0005886);; Biological Process: protein phosphorylation (GO:0006468);; Molecular Function: carbohydrate binding (GO:0030246);; Biological Process: recognition of pollen …	--	--	--	Protein kinase domain;; Protein tyrosine kinase;; S-locus glycoprotein family;; D-mannose binding lectin;; PAN-like domain;; Domain of unknown function (DUF3403)	G-type lectin S-receptor-like serine/threonine-protein kinase At1g11330 (Precursor) GN=At1g11330 OS=Arabidopsis thaliana (Mouse-ear cress) PE=2 SV=3	Serine/threonine-protein kinase {ECO:0000256|PIRNR:PIRNR000641} OS=Brassica napus (Rape) PE=3 SV=1	BnaC08g42090D [Brassica napus]	PREDICTED: Brassica rapa uncharacterized LOC103843509 (LOC103843509), mRNA
BnaC08g35070D	--	--	--	--	[R]	General function prediction only	Ankyrin repeats (many copies)	--	BnaC08g35070D protein {ECO:0000313|EMBL:CDX76921.1} OS=Brassica napus (Rape) PE=4 SV=1	BnaC08g35070D [Brassica napus]	PREDICTED: Brassica rapa uncharacterized LOC103854179 (LOC103854179), mRNA
BnaA09g44100D	[R]	General function prediction only	Molecular Function: nucleotide binding (GO:0000166);; Cellular Component: nucleus (GO:0005634);; Cellular Component: Cul4-RING ubiquitin ligase complex (GO:0080008);;	--	[R]	General function prediction only	WD domain, G-beta repeat;; Histone-binding protein RBBP4 or subunit C of CAF1 complex	WD-40 repeat-containing protein MSI2 GN=MSI2 OS=Arabidopsis thaliana (Mouse-ear cress) PE=2 SV=1	BnaA09g44100D protein {ECO:0000313|EMBL:CDY21659.1} OS=Brassica napus (Rape) PE=4 SV=1	BnaA09g44100D [Brassica napus]	PREDICTED: Brassica rapa glutamate-rich WD repeat-containing protein 1-like (LOC103842635), mRNA
BnaA09g49120D	[K]	Transcription	Molecular Function: sequence-specific DNA binding transcription factor activity (GO:0003700);; Cellular Component: nucleus (GO:0005634);; Biological Process: post-translational protein modification (GO:0043687);; Biological Process: positive regulation of transcription, DNA-templated (GO:0045893);;	--	[K]	Transcription	Histone-like transcription factor (CBF/NF-Y) and archaeal histone;; Core histone H2A/H2B/H3/H4	Nuclear transcription factor Y subunit C-1 GN=T8P19.100 OS=Arabidopsis thaliana (Mouse-ear cress) PE=1 SV=1	BnaA09g49120D protein {ECO:0000313|EMBL:CDY06291.1} OS=Brassica napus (Rape) PE=4 SV=1	BnaA09g49120D [Brassica napus]	PREDICTED: Brassica rapa chromatin accessibility complex protein 1-like (LOC103843421), mRNA
BnaA09g42170D	--	--	Cellular Component: plasma membrane (GO:0005886);; Cellular Component: anchored component of membrane (GO:0031225);;	--	--	--	--	Lysine-rich arabinogalactan protein 18 (Precursor) GN=AGP18 OS=Arabidopsis thaliana (Mouse-ear cress) PE=2 SV=1	BnaA09g42170D protein {ECO:0000313|EMBL:CDY46093.1} OS=Brassica napus (Rape) PE=4 SV=1	BnaA09g42170D [Brassica napus]	PREDICTED: Brassica rapa lysine-rich arabinogalactan protein 17 (LOC103842429), mRNA
BnaA09g49840D	--	--	Cellular Component: nucleus (GO:0005634);; Biological Process: gamete generation (GO:0007276);; Biological Process: regulation of DNA endoreduplication (GO:0032875);; Biological Process: proteasome-mediated ubiquitin-dependent protein catabolic process (GO:0043161);; Biological Process: proteasome assembly (GO:0043248);; Biological Process: regulation of cell division (GO:0051302);; Biological Pr…	K03352|0.0|ath:AT1G06590|hypothetical protein	[DO]	--	Anaphase-promoting complex subunit 5	Anaphase-promoting complex subunit 5 GN=APC5 OS=Arabidopsis thaliana (Mouse-ear cress) PE=1 SV=1	BnaA09g49840D protein {ECO:0000313|EMBL:CDY06219.1} OS=Brassica napus (Rape) PE=4 SV=1	BnaA09g49840D [Brassica napus]	PREDICTED: Brassica rapa anaphase-promoting complex subunit 5-like (LOC103843544), transcript variant X1, mRNA
BnaC08g39590D	--	--	Molecular Function: DNA topoisomerase activity (GO:0003916);; Cellular Component: mitochondrion (GO:0005739);; Biological Process: DNA-dependent DNA replication (GO:0006261);; Molecular Function: DNA-dependent ATPase activity (GO:0008094);; Biological Process: pyrimidine ribonucleotide biosynthetic process (GO:0009220);; Cellular Component: nucleoid (GO:0009295);; Cellular Component: chloroplast …	K02469|2e-16|ath:AT3G10690|DNA gyrase subunit A family protein	[B]	Chromatin structure and dynamics	DNA gyrase C-terminal domain, beta-propeller	Probable DNA gyrase subunit A, chloroplastic/mitochondrial (Precursor) GN=GYRA OS=Arabidopsis thaliana (Mouse-ear cress) PE=1 SV=2	BnaC08g39590D protein {ECO:0000313|EMBL:CDX81642.1} OS=Brassica napus (Rape) PE=4 SV=1	BnaC08g39590D [Brassica napus]	PREDICTED: Brassica rapa probable DNA gyrase subunit A, chloroplastic/mitochondrial (LOC103859359), transcript variant X2, mRNA
BnaC08g42620D	--	--	Cellular Component: chloroplast (GO:0009507);;	--	--	--	--	--	BnaC08g42620D protein {ECO:0000313|EMBL:CDY22628.1} OS=Brassica napus (Rape) PE=4 SV=1	BnaC08g42620D [Brassica napus]	Eutrema salsugineum hypothetical protein (EUTSA_v10009166mg) mRNA, complete cds
BnaC08g42060D	--	--	--	--	--	--	Protein of unknown function (DUF1218)	--	BnaC08g42060D protein {ECO:0000313|EMBL:CDY34647.1} OS=Brassica napus (Rape) PE=4 SV=1	BnaC08g42060D [Brassica napus]	PREDICTED: Brassica rapa uncharacterized LOC103843240 (LOC103843240), mRNA
BnaA09g49190D	[P]	Inorganic ion transport and metabolism	Cellular Component: cell wall (GO:0005618);; Cellular Component: Golgi apparatus (GO:0005794);; Cellular Component: cytosol (GO:0005829);; Cellular Component: plasma membrane (GO:0005886);; Biological Process: gluconeogenesis (GO:0006094);; Biological Process: glycolysis (GO:0006096);; Biological Process: protein folding (GO:0006457);; Biological Process: N-terminal protein myristoylation (GO:000…	K00434|1e-177|ath:AT1G07890|APX1	--	--	Peroxidase	L-ascorbate peroxidase 1, cytosolic GN=APX1 OS=Arabidopsis thaliana (Mouse-ear cress) PE=1 SV=2	BnaA09g49190D protein {ECO:0000313|EMBL:CDY06284.1} OS=Brassica napus (Rape) PE=3 SV=1	BnaA09g49190D [Brassica napus]	PREDICTED: Brassica rapa L-ascorbate peroxidase 1, cytosolic (LOC103843426), transcript variant X3, mRNA
BnaC08g34600D	--	--	Cellular Component: plasma membrane (GO:0005886);; Cellular Component: anchored component of membrane (GO:0031225);;	--	--	--	--	Lysine-rich arabinogalactan protein 18 (Precursor) GN=AGP18 OS=Arabidopsis thaliana (Mouse-ear cress) PE=2 SV=1	BnaC08g34600D protein {ECO:0000313|EMBL:CDX76874.1} OS=Brassica napus (Rape) PE=4 SV=1	BnaC08g34600D [Brassica napus]	PREDICTED: Brassica rapa lysine-rich arabinogalactan protein 17 (LOC103842429), mRNA
BnaC08g34200D	--	--	Molecular Function: binding (GO:0005488);; Molecular Function: oxidoreductase activity (GO:0016491);;	K00517|5e-14|ath:AT3G26220|CYP71B3	[Q]	Secondary metabolites biosynthesis, transport and catabolism	--	Cytochrome P450 71B3 GN=CYP71B3 OS=Arabidopsis thaliana (Mouse-ear cress) PE=2 SV=2	BnaC08g34200D protein {ECO:0000313|EMBL:CDX76834.1} OS=Brassica napus (Rape) PE=4 SV=1	BnaC08g34200D [Brassica napus]	PREDICTED: Brassica rapa cytochrome P450 71B3-like (LOC103842434), mRNA
BnaC08g39690D	--	--	Molecular Function: chromatin binding (GO:0003682);; Molecular Function: sequence-specific DNA binding transcription factor activity (GO:0003700);; Cellular Component: nucleus (GO:0005634);; Biological Process: regulation of transcription, DNA-templated (GO:0006355);; Biological Process: guard cell differentiation (GO:0010052);; Molecular Function: sequence-specific DNA binding (GO:0043565);;	K09422|7e-81|ath:AT1G14350|FLP	[K]	Transcription	--	--	BnaC08g39690D protein {ECO:0000313|EMBL:CDX81632.1} OS=Brassica napus (Rape) PE=4 SV=1	BnaC08g39690D [Brassica napus]	PREDICTED: Brassica rapa uncharacterized LOC103842974 (LOC103842974), transcript variant X1, mRNA
BnaA09g49890D	[A]	RNA processing and modification	Molecular Function: nucleic acid binding (GO:0003676);; Molecular Function: ribonuclease activity (GO:0004540);; Cellular Component: nucleus (GO:0005634);; Biological Process: RNA modification (GO:0009451);;	--	[A]	RNA processing and modification	CAF1 family ribonuclease	Probable CCR4-associated factor 1 homolog 1 GN=CAF1-1 OS=Arabidopsis thaliana (Mouse-ear cress) PE=2 SV=1	BnaA09g49890D protein {ECO:0000313|EMBL:CDY06214.1} OS=Brassica napus (Rape) PE=4 SV=1	BnaA09g49890D [Brassica napus]	PREDICTED: Brassica rapa probable CCR4-associated factor 1 homolog 1 (LOC103843553), mRNA
BnaC08g36110D	--	--	--	--	--	--	--	--	BnaC08g36110D protein {ECO:0000313|EMBL:CDX81990.1} OS=Brassica napus (Rape) PE=4 SV=1	BnaC08g36110D [Brassica napus]	--
BnaA09g43250D	--	--	Cellular Component: mitochondrion (GO:0005739);;	--	--	--	--	30S ribosomal protein S31, mitochondrial (Precursor) GN=At2g21290 OS=Arabidopsis thaliana (Mouse-ear cress) PE=3 SV=1	BnaA09g43250D protein {ECO:0000313|EMBL:CDY13823.1} OS=Brassica napus (Rape) PE=4 SV=1	BnaA09g43250D [Brassica napus]	Brassica rapa subsp. pekinensis clone KBrB082F21, complete sequence
BnaA09g45320D	[O]	Posttranslational modification, protein turnover, chaperones	Molecular Function: copper ion binding (GO:0005507);; Molecular Function: calmodulin binding (GO:0005516);; Molecular Function: ATP binding (GO:0005524);; Cellular Component: mitochondrion (GO:0005739);; Cellular Component: cytosol (GO:0005829);; Biological Process: gluconeogenesis (GO:0006094);; Biological Process: glycolysis (GO:0006096);; Biological Process: protein folding (GO:0006457);; Biol…	K04078|7e-64|ath:AT1G14980|CPN10	[O]	Posttranslational modification, protein turnover, chaperones	Chaperonin 10 Kd subunit	10 kDa chaperonin OS=Brassica napus (Rape) PE=3 SV=1	BnaA09g45320D protein {ECO:0000313|EMBL:CDY33726.1} OS=Brassica napus (Rape) PE=3 SV=1	BnaA09g45320D [Brassica napus]	PREDICTED: Brassica rapa 10 kDa chaperonin-like (LOC103842928), mRNA
BnaC08g35020D	--	--	Molecular Function: dicarboxylic acid transmembrane transporter activity (GO:0005310);; Cellular Component: mitochondrial inner membrane (GO:0005743);; Biological Process: dicarboxylic acid transport (GO:0006835);; Biological Process: mitochondrial transport (GO:0006839);; Biological Process: response to chitin (GO:0010200);; Biological Process: proton transport (GO:0015992);; Cellular Component:…	--	[C]	Energy production and conversion	Mitochondrial carrier protein	Mitochondrial uncoupling protein 5 GN=F14M13.10 OS=Arabidopsis thaliana (Mouse-ear cress) PE=2 SV=1	BnaC08g35020D protein {ECO:0000313|EMBL:CDX76916.1} OS=Brassica napus (Rape) PE=3 SV=1	BnaC08g35020D [Brassica napus]	Brassica rapa subsp. pekinensis clone KBrH070I10, complete sequence
BnaC08g40280D	--	--	Cellular Component: nucleus (GO:0005634);;	--	--	--	Protein of unknown function (DUF1262)	--	BnaC08g40280D protein {ECO:0000313|EMBL:CDY16095.1} OS=Brassica napus (Rape) PE=4 SV=1	BnaC08g40280D [Brassica napus]	PREDICTED: Brassica rapa uncharacterized LOC103843046 (LOC103843046), mRNA
BnaA09g51090D	[RTKL]	--	Biological Process: DNA replication checkpoint (GO:0000076);; Biological Process: nuclear division (GO:0000280);; Biological Process: double-strand break repair via homologous recombination (GO:0000724);; Biological Process: cytokinesis by cell plate formation (GO:0000911);; Molecular Function: protein serine/threonine kinase activity (GO:0004674);; Molecular Function: protein binding (GO:0005515…	K06632|0.0|ath:AT1G02970|WEE1	[D]	Cell cycle control, cell division, chromosome partitioning	Protein kinase domain;; Protein tyrosine kinase	Wee1-like protein kinase GN=WEE1 OS=Arabidopsis thaliana (Mouse-ear cress) PE=1 SV=1	BnaA09g51090D protein {ECO:0000313|EMBL:CDY32487.1} OS=Brassica napus (Rape) PE=4 SV=1	BnaA09g51090D [Brassica napus]	PREDICTED: Brassica rapa wee1-like protein kinase (LOC103843728), mRNA
BnaC08g34810D	--	--	--	--	--	--	--	--	BnaC08g34810D protein {ECO:0000313|EMBL:CDX76895.1} OS=Brassica napus (Rape) PE=4 SV=1	BnaC08g34810D [Brassica napus]	--
BnaA09g51390D	--	--	--	K00231|1e-07|ath:AT4G01690|PPOX	[H]	Coenzyme transport and metabolism	--	Protoporphyrinogen oxidase 1, chloroplastic (Precursor) GN=T15B16.13 OS=Arabidopsis thaliana (Mouse-ear cress) PE=1 SV=1	BnaA09g51390D protein {ECO:0000313|EMBL:CDY32457.1} OS=Brassica napus (Rape) PE=4 SV=1	BnaA09g51390D [Brassica napus]	PREDICTED: Brassica rapa protoporphyrinogen oxidase 1, chloroplastic (LOC103844594), mRNA
BnaC08g42900D	[GEPR]	--	Molecular Function: sugar:hydrogen symporter activity (GO:0005351);; Cellular Component: endoplasmic reticulum (GO:0005783);; Cellular Component: plasma membrane (GO:0005886);; Biological Process: tryptophan catabolic process (GO:0006569);; Biological Process: response to water deprivation (GO:0009414);; Biological Process: systemic acquired resistance (GO:0009627);; Biological Process: response …	--	[R]	General function prediction only	Sugar (and other) transporter;; Major Facilitator Superfamily	Sugar transporter ERD6 GN=F7G19.19 OS=Arabidopsis thaliana (Mouse-ear cress) PE=1 SV=3	BnaC08g42900D protein {ECO:0000313|EMBL:CDY22656.1} OS=Brassica napus (Rape) PE=3 SV=1	BnaC08g42900D [Brassica napus]	PREDICTED: Brassica rapa sugar transporter ERD6 (LOC103843369), mRNA
BnaC08g44060D	[H]	Coenzyme transport and metabolism	Biological Process: mitotic G2 phase (GO:0000085);; Molecular Function: nucleotide binding (GO:0000166);; Cellular Component: nucleus (GO:0005634);; Cellular Component: cytosol (GO:0005829);; Cellular Component: plasma membrane (GO:0005886);; Biological Process: DNA repair (GO:0006281);; Molecular Function: small protein activating enzyme activity (GO:0008641);; Biological Process: response to wa…	K04532|0.0|rcu:RCOM_0487930|NEDD8-activating enzyme E1 regulatory subunit, putative	[O]	Posttranslational modification, protein turnover, chaperones	ThiF family	NEDD8-activating enzyme E1 regulatory subunit {ECO:0000305} OS=Arabidopsis thaliana (Mouse-ear cress) PE=1 SV=1	BnaC08g44060D protein {ECO:0000313|EMBL:CDY10045.1} OS=Brassica napus (Rape) PE=4 SV=1	BnaC08g44060D [Brassica napus]	Brassica rapa NEDD8-activating enzyme E1 regulatory subunit (LOC103844163), mRNA >gi|157849723|gb|EU186356.1| Brassica rapa clone S15 auxin resistant 1 mRNA, complete cds
BnaC08g44370D	[T]	Signal transduction mechanisms	Cellular Component: nucleus (GO:0005634);; Cellular Component: cytoplasm (GO:0005737);; Biological Process: response to nutrient (GO:0007584);; Biological Process: response to wounding (GO:0009611);; Biological Process: response to blue light (GO:0009637);; Biological Process: response to abscisic acid (GO:0009737);; Biological Process: plant-type cell wall modification (GO:0009827);; Biological …	--	[U]	Intracellular trafficking, secretion, and vesicular transport	Endonuclease/Exonuclease/phosphatase family	Type I inositol 1,4,5-trisphosphate 5-phosphatase 13 GN=F3F20.8 OS=Arabidopsis thaliana (Mouse-ear cress) PE=1 SV=1	BnaC08g44370D protein {ECO:0000313|EMBL:CDY10014.1} OS=Brassica napus (Rape) PE=4 SV=1	BnaC08g44370D [Brassica napus]	PREDICTED: Brassica rapa type I inositol 1,4,5-trisphosphate 5-phosphatase 13-like (LOC103843594), transcript variant X2, mRNA
BnaA09g47990D	--	--	Biological Process: cell morphogenesis (GO:0000902);; Molecular Function: receptor signaling protein serine/threonine kinase activity (GO:0004702);; Molecular Function: protein tyrosine kinase activity (GO:0004713);; Molecular Function: ATP binding (GO:0005524);; Cellular Component: plasma membrane (GO:0005886);; Biological Process: protein phosphorylation (GO:0006468);; Cellular Component: plasm…	--	--	--	Leucine Rich Repeat;; Leucine rich repeat;; WD domain, G-beta repeat	Protein STRUBBELIG (Precursor) OS=Arabidopsis thaliana (Mouse-ear cress) PE=1 SV=1	BnaA09g47990D protein {ECO:0000313|EMBL:CDY34873.1} OS=Brassica napus (Rape) PE=4 SV=1	BnaA09g47990D [Brassica napus]	PREDICTED: Brassica rapa protein STRUBBELIG-like (LOC103843254), transcript variant X2, mRNA
BnaC08g34750D	--	--	Molecular Function: serine-type carboxypeptidase activity (GO:0004185);; Cellular Component: extracellular region (GO:0005576);; Biological Process: proteolysis (GO:0006508);; Biological Process: glycine catabolic process (GO:0006546);; Biological Process: unsaturated fatty acid biosynthetic process (GO:0006636);; Biological Process: oxidoreduction coenzyme metabolic process (GO:0006733);; Biolog…	--	[OE]	--	Serine carboxypeptidase	Serine carboxypeptidase-like 10 (Precursor) GN=F21P24.6 OS=Arabidopsis thaliana (Mouse-ear cress) PE=2 SV=1	BnaC08g34750D protein {ECO:0000313|EMBL:CDX76889.1} OS=Brassica napus (Rape) PE=4 SV=1	BnaC08g34750D [Brassica napus]	PREDICTED: Brassica rapa serine carboxypeptidase-like 10 (LOC103842453), transcript variant X1, mRNA
BnaC08g40530D	--	--	--	--	--	--	--	--	BnaC08g40530D protein {ECO:0000313|EMBL:CDY16070.1} OS=Brassica napus (Rape) PE=4 SV=1	BnaC08g40530D [Brassica napus]	--
[truncated: 1,417 more rows]
